# Supplementary material for: A Multicenter Study on Formulaic Machine Learning Models for Prediction in Neonatal Necrotizing Enterocolitis: Application and Comparison of Kolmogorov–Arnold Networks
Source: Research Square preprint supplement (doi:10.21203/rs.3.rs-7007626/v1), 2025-07-23
Supplement: Supplementary file 1 [file 5c34983c0fb9132269dc508a.xlsx]

## Sheet: NEC_sevNEC
Sample_ID	Weight	Gender	Gestational Age	Delivery Method	Gestational Hypertension	Chorioamnionitis	Intrahepatic Cholestasis of Pregnancy	Premature Rupture of Membranes	Placental Condition	Antenatal Steroid Use	Resuscitation Needed	1-min Apgar Score	5-min Apgar Score	Age of Illness Onset	Corrected Gestational Age	Weight at NEC Onset	Full Enteral Feeding at Onset	hsPDA After Birth	Respiratory Support During Illness	Age at antibiotic use	Duration of antibiotic use	Sepsis	Shock	Gastrointestinal Perforation	BPD	BPD Severity	WBC Count at NEC Onset	Platelet Count at NEC Onset	RBC Count at NEC Onset	Hemoglobin Level at NEC Onset	Hematocrit at NEC Onset	Blood Transfusions in 1 Week Before NEC	Acute Kidney Injury During NEC	sevNEC
JX1431433	3.55	0	274	0	0	0	0	0	0	0	0	9	10	2	276	3.16	1	0	0	2	14	1	0	1	0	0	7.27	298	4.6	167	49	0	0	1
JX1448519	0.94	0	192	0	0	1	0	0	0	1	1	7	7	0	192	0.88	0	0	1	4	63	0	0	0	1	2	10.35	116	3.98	158	46.8	0	0	1
JX1449103	1.04	0	226	1	0	1	0	0	0	1	0	9	10	2	228	0.99	0	0	1	1	24	0	0	0	1	1	3.85	150	4.11	165	47.7	0	0	1
JX1454013	1.5	0	220	1	0	0	0	0	0	0	0	7	9	16	236	1.65	1	0	0	14	17	0	0	1	0	0	5.25	244	3.09	103	33	0	0	0
JX1457343	3.1	0	283	0	0	0	0	0	0	0	0	10	10	8	291	3.26	1	0	0	8	6	0	0	1	0	0	12.41	318	4.62	159	44.7	0	0	0
JX1459819	2.1	1	254	0	0	0	0	0	0	0	0	9	10	1	255	2.12	0	0	0	2	4	0	0	1	0	0	12.81	252	5.15	188	53.1	0	0	0
JX1460454	2	1	217	1	1	1	0	0	0	1	0	8	10	26	243	2.05	0	0	1	1	12	0	0	1	1	2	21.27	608	5.35	171	52.2	1	0	0
JX1461808	1.75	1	231	1	0	1	0	0	0	1	0	9	10	4	235	1.59	0	0	1	5	13	0	0	1	0	0	9.19	311	3.93	150	44.7	0	0	0
JX1465107	2.75	0	260	1	0	0	0	0	0	0	0	9	10	4	264	2.75	0	1	1	1	10	0	0	1	0	0	17.18	294	5.14	181	54.6	0	0	1
JX1467005	3.9	1	280	0	0	0	0	0	0	0	0	9	10	3	283	3.71	1	0	0	1	18	0	0	0	0	0	13.49	200	4.04	142	40.04	0	0	1
JX1468057	1.45	1	206	1	0	1	0	0	2	1	2	5	9	2	208	1.52	0	0	1	2	14	0	0	0	1	2	7.21	139	3.79	138	40.4	0	0	0
JX1470592	1.18	1	198	0	1	0	0	0	0	1	2	5	8	10	208	1.37	2	0	1	15	35	1	0	0	0	0	10.31	185	2.35	81	25	0	0	0
JX1470658	1.14	1	194	0	0	0	0	0	0	1	2	7	9	3	197	1.1	2	0	1	1	33	1	0	1	1	3	13.2	137	4.57	172	52.7	0	0	1
JX1471676	3	1	285	0	0	1	0	0	0	0	0	10	10	1	286	2.93	1	0	0	2	14	0	0	0	0	0	6.15	280	4.74	162	45.7	0	0	0
JX1475332	2.6	0	266	1	0	1	0	0	0	0	0	9	10	5	271	2.6	1	0	0	7	22	0	0	0	0	0	14.9	370	3.06	108	32.3	0	0	0
JX1475918	2.6	1	280	0	0	0	0	0	0	0	0	10	10	2	282	2.6	1	0	0	5	16	0	0	0	0	0	6.41	194	5.19	192	56.4	0	0	0
JX1475957	3	0	280	1	0	1	0	0	0	0	0	9	10	2	282	3.3	1	0	0	3	19	0	0	0	0	0	21.12	277	3.58	135	38.8	0	0	0
JX1478174	2.59	1	267	0	0	0	0	0	0	0	0	9	10	11	278	2.935	1	0	0	11	10	0	0	0	0	0	11.67	380	4.45	143	41.6	1	0	0
JX1478864	2.6	0	242	0	0	1	0	0	0	1	0	9	10	1	243	2.5	1	0	0	1	13	0	0	0	0	0	3.93	115	4.22	154	47.4	0	0	1
JX1479698	2.3	1	253	1	0	1	0	0	0	1	0	8	9	2	255	2.3	2	0	0	1	16	0	0	0	0	0	8.9	125	3.23	123	34.6	0	0	0
JX1480569	2.9	1	266	0	0	0	0	0	0	0	0	9	10	1	267	2.74	2	0	0	1	4	0	0	0	0	0	10	254	4.4	157	45.1	0	0	0
JX1483248	2.1	0	250	1	0	0	0	0	0	1	0	9	10	14	264	2.38	1	0	0	21	23	0	0	0	0	0	17.1	558	3.69	136	39.4	0	0	0
JX1483287	3	1	260	1	1	0	0	0	0	0	0	9	10	4	264	2.845	1	0	1	6	33	1	1	1	0	0	4.13	192	5.37	167	50.5	0	1	1
JX1483716	3.53	1	280	1	0	0	0	0	0	0	0	9	10	3	283	3.85	1	0	0	3	11	1	0	1	0	0	2.05	135	4.07	138	40.6	0	0	1
JX1485546	2.5	1	249	0	1	1	0	0	0	1	0	8	10	1	250	2.38	1	0	0	2	13	0	0	0	0	0	10.08	174	4.29	161	43.1	0	0	0
JX1485875	3.55	1	280	1	0	0	0	0	0	0	0	9	10	13	293	3.87	1	0	0	15	12	1	0	0	0	0	10.95	591	5.12	169	49.6	0	0	0
JX1486507	3.55	1	277	0	1	0	0	0	0	0	0	9	10	1	278	3.17	2	0	0	1	15	0	0	0	0	0	5.99	275	4.11	143	41.4	0	0	0
JX1486534	2.2	0	259	0	0	0	0	0	0	0	0	9	10	1	260	2.2	2	0	0	2	13	0	0	0	0	0	14.34	313	4.55	159	47.6	0	0	0
JX1489224	2.45	0	259	0	1	0	0	0	0	0	0	9	10	1	260	2.44	1	0	0	3	9	0	0	0	0	0	12.74	337	5.03	183	51.8	0	0	0
JX1490459	3.2	0	277	1	0	0	0	0	0	0	0	9	10	14	291	3.46	1	0	0	21	18	0	0	0	0	0	11.9	500	3.63	123	34.8	0	0	0
JX1491344	1.86	0	237	1	0	0	0	0	0	1	0	10	10	17	254	2.04	1	0	0	20	8	0	0	0	0	0	11.89	380	3.29	118	32.7	0	0	0
JX1491908	3.5	1	280	0	0	1	0	0	0	0	0	9	10	2	282	3.29	1	0	0	3	16	0	0	0	0	0	7.23	215	3.3	115	32.9	0	0	0
JX1492322	2.75	0	250	1	0	0	0	0	0	1	0	8	9	5	255	2.4	1	0	0	6	6	0	0	0	0	0	12.47	297	5.41	187	56.3	0	0	0
JX1492547	2.8	1	258	0	0	1	0	0	0	0	0	5	7	1	259	2.56	0	0	1	1	15	1	1	0	0	0	13.2	238	4.27	146	43.9	0	0	0
JX1492759	2.8	1	259	0	0	1	0	0	0	0	0	9	10	1	260	2.73	1	0	0	3	5	0	0	0	0	0	6	179	4.92	165	49.2	0	0	0
JX1495459	1.5	1	218	0	1	1	0	0	0	1	1	8	9	20	238	1.73	2	0	1	1	7	0	0	0	0	0	4.47	269	3.75	125	35.8	0	0	1
JX1497574	2.4	0	238	0	0	0	0	0	0	1	0	8	10	19	257	2.71	1	0	0	19	6	0	0	0	0	0	12.18	343	4.49	155	46.2	0	0	0
JX1498084	2.55	0	256	1	0	0	0	0	0	0	0	8	10	6	262	2.5	1	0	0	7	10	0	0	0	0	0	9.18	259	3.41	117	34.6	0	0	0
JX1498650	3.2	1	259	0	0	0	0	0	0	0	0	10	10	10	269	2.98	1	0	0	12	6	0	0	0	0	0	8.7	430	4.99	174	49.6	0	0	0
JX1498913	2.3	0	261	0	0	0	0	0	0	0	0	10	10	8	269	2.32	1	0	0	10	15	0	0	0	0	0	10.9	599	4.77	166	48.9	0	0	0
JX1501753	1.2	1	209	0	0	0	0	1	0	1	0	8	10	1	210	1.19	2	0	1	1	37	1	0	1	0	0	6.62	123	4.19	154	44.8	0	0	1
JX1503183	2.6	1	259	0	0	1	0	0	0	0	0	9	10	9	268	2.52	1	0	0	10	7	0	0	0	0	0	6.18	316	4.25	160	46.6	0	0	0
JX1504214	1.325	0	211	0	0	1	0	0	1	1	0	9	9	22	233	1.35	1	1	1	1	20	1	0	1	1	1	22.12	499	3.5	121	36.8	0	0	0
JX1505504	3.35	1	273	1	0	0	0	0	0	0	0	10	10	2	275	3.24	1	0	0	2	14	0	0	0	0	0	12.14	268	3.7	137	37.6	0	0	1
JX1507061	2.75	1	277	1	0	0	0	0	0	0	0	10	10	8	285	2.81	1	0	0	9	12	0	0	0	0	0	9.2	375	4.53	158	48.9	0	0	0
JX1509852	3	1	272	1	0	0	0	0	0	0	0	9	10	4	276	3.5	1	0	0	4	23	0	0	0	0	0	13.73	230	3.52	124	34.3	0	0	0
JX1515310	3.65	1	281	0	0	0	0	0	0	0	0	10	10	1	282	3.52	1	0	0	1	13	0	0	0	0	0	16.38	239	4.79	167	48.7	0	0	0
JX1518133	2.5	1	254	1	0	0	0	0	0	0	0	8	10	4	258	2.355	0	0	0	8	22	0	0	0	0	0	20.49	438	3.46	126	35.6	0	0	0
JX1518983	2.475	1	259	1	0	0	0	0	0	0	0	9	10	3	262	2.36	1	0	1	3	8	0	0	0	0	0	5.97	118	4.58	156	52.2	0	0	0
JX1520887	3.6	1	271	0	0	0	0	0	0	0	0	9	10	14	285	3.52	1	0	0	15	12	0	0	0	0	0	15.17	702	3.74	126	36.2	0	0	0
JX1521104	3	1	259	0	0	1	0	0	0	0	0	10	10	9	268	3.19	1	0	0	10	7	0	0	0	0	0	15.82	433	4.58	159	46	0	0	0
JX1521115	3.1	0	278	0	0	0	0	0	0	0	0	10	10	2	280	2.88	0	0	0	1	3	0	0	1	0	0	6.69	93	4.34	133	36.2	0	0	0
JX1521669	2.6	1	268	1	0	0	0	0	0	0	0	8	10	13	281	3.3	1	0	0	21	11	0	0	0	0	0	8.59	231	4.28	138	39.3	0	0	0
JX1523646	2.5	1	253	0	0	1	0	0	0	0	0	9	10	7	260	2.7	1	0	0	8	14	0	0	0	0	0	11.04	267	3.16	108	30.9	0	0	0
JX1524841	3.05	1	264	1	0	0	0	0	0	0	0	7	9	6	270	2.99	1	0	1	6	8	1	1	0	0	0	5.4	240	4.49	163	46.3	0	0	1
JX1541212	2	0	234	1	0	0	0	0	0	1	1	6	8	1	235	2	0	0	1	1	15	0	0	0	0	0	16.01	312	4.68	151	44.8	0	0	0
JX1542843	3.1	0	264	0	0	0	0	0	0	0	0	10	10	11	275	2.83	0	0	0	2	8	0	0	0	0	0	11.74	281	5.37	189	55.2	0	0	0
JX1543748	1.34	0	240	1	0	1	0	0	0	0	1	8	7	2	242	1.235	0	1	1	1	16	1	0	0	1	3	3.75	116	3.81	153	41.2	0	0	1
JX1544216	3.5	1	280	0	0	0	0	0	0	0	0	10	10	7	287	3.52	1	0	0	7	3	0	0	0	0	0	9.32	111	5.08	176	52.8	0	0	0
JX1546651	2	1	230	1	0	0	0	0	0	1	0	9	10	2	232	1.91	0	0	0	5	10	0	0	0	0	0	27.16	393	4.66	166	48.9	0	0	0
JX1547316	3.1	0	285	0	0	0	0	0	0	0	0	10	10	25	310	3.8	1	0	0	26	10	0	0	0	0	0	9.12	454	4.18	141	41.4	0	0	0
JX1549292	3	1	254	1	0	1	0	1	0	0	1	8	10	5	259	2.94	0	0	1	5	10	0	0	0	0	0	20.33	327	4.74	149	45.2	0	0	0
JX1549340	3.9	1	271	1	0	0	0	0	0	1	1	5	7	28	299	4.38	1	0	0	26	10	0	0	0	0	0	8.31	225	4.09	132	40.5	0	0	0
JX1550392	2.75	0	266	1	0	0	0	0	0	0	0	10	10	18	284	2.82	1	0	0	18	8	0	0	0	0	0	14.35	597	4.17	140	40.6	0	0	0
JX1555803	2.8	1	254	0	0	1	0	1	0	0	0	10	10	10	264	2.8	0	0	0	7	7	0	0	0	0	0	11.69	412	4.2	148	45.7	0	0	0
JX1556735	1.4	0	203	1	0	0	0	0	0	0	0	10	10	1	204	1.4	0	0	1	1	2	0	0	0	1	3	12.9	439	4.99	160	50.1	0	0	0
JX1557547	1.8	1	234	1	0	0	0	0	0	0	0	10	10	3	237	1.78	1	0	0	4	18	0	0	1	0	0	10.73	216	5.12	174	53.2	0	0	1
JX1558836	2.15	0	230	0	0	0	0	0	0	1	0	10	10	5	235	2.3	0	0	1	6	4	0	0	0	1	1	17.87	252	4.48	162	45.7	1	0	0
JX1560271	1.6	0	209	1	0	1	0	0	0	1	0	10	10	9	218	1.68	0	0	1	1	17	0	0	0	1	3	26	423	3.71	123	37.9	0	0	0
JX1561112	2.5	1	259	0	0	0	0	0	0	0	0	10	10	7	266	2.55	1	0	0	7	12	0	0	0	0	0	9.93	215	4.61	165	48.6	0	0	0
JX1566248	3.1	1	263	0	0	0	0	1	0	0	0	10	10	1	264	3.01	0	0	0	1	7	0	0	0	0	0	11.98	303	4.88	168	50.8	0	0	0
JX1569620	3.3	0	272	1	1	0	0	0	0	0	0	10	10	3	275	3.28	0	0	0	4	8	0	0	0	0	0	8.9	310	4.51	150	45.6	0	0	0
JX1569810	3.25	1	268	1	0	0	0	0	0	0	0	10	10	3	271	3.14	0	0	0	3	11	0	0	0	0	0	8.6	314	4.79	179	50.2	0	0	0
JX1571923	2.5	1	262	1	0	0	0	0	0	0	1	5	9	3	265	2.56	0	0	0	3	18	0	0	0	0	0	18.37	370	2.96	98	29.6	1	0	0
JX1574345	3.45	1	274	0	0	0	0	0	0	0	0	10	10	20	294	4	1	0	0	20	7	0	0	0	0	0	4.25	442	3.35	105	31.3	0	0	0
JX1576803	4	1	271	0	0	0	0	0	0	0	0	10	10	5	276	4.4	0	0	0	17	4	0	0	0	0	0	12.85	342	4.09	138	39.8	0	0	0
JX1576963	4.4	1	280	0	0	0	0	0	0	0	0	10	10	7	287	4.73	0	0	0	17	9	0	0	0	0	0	7.85	502	4.22	136	41.3	0	0	0
JX1577350	2.9	1	273	0	0	0	0	0	0	0	0	10	10	1	274	2.72	0	0	0	2	6	0	0	0	0	0	9.5	277	6	188	57.2	0	0	0
JX1577370	3.8	1	278	0	0	0	0	0	0	0	0	10	10	2	280	3.84	1	0	0	7	5	1	0	0	0	0	4	209	5.36	183	52.5	0	0	1
JX1578521	0.85	1	188	1	0	1	0	0	0	0	1	0	5	5	193	0.89	0	1	1	6	16	0	0	1	1	1	7.14	24	4.46	147	44.3	0	0	0
JX1581741	1.13	1	189	0	0	0	0	0	0	1	1	6	8	6	195	1	0	0	1	1	35	1	1	1	1	3	60.22	216	3.58	113	33.5	0	0	1
JX1582461	3.45	0	259	1	0	0	0	0	0	0	0	10	10	22	281	4.3	1	0	0	23	3	0	0	0	0	0	11.48	395	4.92	165	49.7	0	0	0
JX1584615	2.95	1	273	0	0	0	0	0	0	0	0	10	10	12	285	3.3	1	0	0	13	14	0	0	0	0	0	15.16	544	4.95	174	51.3	0	0	0
JX1585093	3.15	1	266	0	0	0	0	0	0	0	0	10	10	2	268	3.1	0	0	0	2	10	0	0	0	0	0	10.32	150	5.37	192	54.4	0	0	0
JX1585184	2.85	1	264	0	0	0	0	0	0	0	0	10	10	1	265	2.89	1	0	0	6	15	0	0	0	0	0	20.93	286	4.66	158	46.3	0	0	0
JX1585185	1.33	1	217	1	0	0	0	0	1	1	1	3	6	1	218	1.24	0	0	1	2	10	0	0	0	1	3	5.35	202	3.49	129	40	0	0	0
JX1587798	3.5	1	284	0	0	0	0	0	0	0	0	10	10	1	285	3.37	0	0	0	1	8	0	0	0	0	0	14.01	319	4.4	157	46.4	0	0	0
JX1588742	3.45	1	289	0	0	0	0	0	0	0	0	10	10	1	290	3.33	0	0	0	1	18	0	0	0	0	0	12.03	211	5.24	183	55	0	0	0
JX1592756	2.11	0	238	1	0	0	0	0	0	0	0	10	10	1	239	2	0	0	0	2	16	0	0	0	0	0	6.96	224	3.36	132	39.7	0	0	0
JX1593031	2.41	0	238	1	0	0	0	0	0	0	0	9	10	1	239	2.36	0	0	0	4	14	0	0	0	0	0	9.49	288	3.86	152	43.2	0	0	0
JX1593682	1.34	1	228	1	1	0	0	0	0	1	0	7	9	3	231	1.39	0	0	1	1	16	1	1	0	1	3	17.6	232	3.4	139	39.6	0	0	1
JX1594367	2.5	0	264	0	0	0	0	0	0	0	0	10	10	9	273	2.38	1	0	0	11	8	0	0	0	0	0	9.61	446	4.57	161	45.8	0	0	0
JX1595405	1.833	0	219	0	0	0	0	0	0	0	0	10	10	1	220	1.8	1	0	1	4	22	0	0	0	1	3	11.82	181	3.44	118	33.8	0	0	0
JX1595704	3	1	246	1	0	0	0	0	0	0	0	10	10	1	247	2.9	0	0	0	6	10	0	0	0	0	0	10.91	322	3.73	137	39.6	0	0	0
NMG536863	1.48	0	206	0	0	0	0	0	0	0	2	7	9	3	209	1.46	0	0	1	1	53	0	0	0	0	0	8.71	147	3.33	131	39	0	0	0
NMG537400	1.73	0	218	1	0	0	0	1	0	1	0	9	9	3	221	1.7	0	0	1	1	29	1	0	0	0	0	15.56	231	4.44	177	51	0	0	0
NMG538598	2.4	1	264	1	0	0	0	0	0	0	0	9	9	1	265	2.28	1	0	1	1	14	0	0	0	0	0	11.22	204	5.55	190	56	0	0	0
NMG539348	1.66	1	217	0	0	0	0	1	0	1	0	9	9	1	218	1.66	0	0	1	1	41	0	0	0	1	1	10.86	295	4.68	173	49.4	0	0	0
NMG539380	2.1	0	236	0	0	0	0	1	0	0	0	9	9	3	239	2.08	0	0	1	3	22	0	0	0	0	0	7.85	253	4.39	173	49.3	0	0	0
NMG539627	3.47	1	260	0	0	0	0	0	0	0	0	9	9	6	266	3.27	1	0	1	1	9	0	0	0	0	0	16.3	436	4.72	163	47.6	0	0	0
NMG540126	1.35	1	223	1	1	0	0	0	0	1	2	7	9	13	236	1.39	0	1	1	1	46	0	0	0	0	0	4.15	153	2.72	109	31.9	0	0	0
NMG540828	2.2	1	265	0	0	0	0	0	0	0	0	9	9	13	278	2.48	1	1	1	1	20	0	0	0	0	0	5.86	259	2.96	99	29.1	0	0	0
NMG541155	0.9	0	195	0	0	0	0	0	0	1	2	5	9	3	198	0.9	0	0	1	1	82	1	0	0	0	0	14.87	88	2.63	108	31	1	0	0
NMG541270	2.64	0	242	1	0	0	0	0	1	0	2	4	8	2	244	2.62	0	1	1	1	35	0	0	0	0	0	6.29	125	4.48	172	48.7	0	0	0
NMG542048	1.28	0	200	0	1	0	0	0	0	0	0	9	9	11	211	1.2	0	1	1	1	21	0	0	0	0	0	22.03	269	3.34	115	35.7	0	0	0
NMG542861	1.15	1	213	1	1	0	0	0	0	0	0	9	9	13	226	1.14	0	1	1	1	31	1	0	0	0	0	20.32	63	3.17	133	37.9	0	0	0
NMG545202	1.26	0	209	0	0	0	0	1	0	0	0	9	9	18	227	1.44	1	1	1	1	44	1	1	0	1	2	27.17	147	2.49	90	24.6	1	0	0
NMG546135	1.35	0	224	0	1	0	0	0	0	1	0	9	9	6	230	1.3	0	0	1	1	10	0	0	0	0	0	13.06	175	5.06	194	56.7	0	1	0
NMG546215	2.72	1	249	1	0	0	0	0	0	0	0	9	9	3	252	2.63	0	0	1	2	10	0	0	0	0	0	13.26	250	5.98	209	60.8	0	0	0
NMG546262	1.27	1	218	1	1	0	0	0	0	0	0	8	9	2	220	1.25	0	0	1	2	24	0	0	0	0	0	9.46	196	5.07	205	61.5	0	0	0
NMG546262002	1.27	1	218	1	1	0	0	0	0	0	0	8	9	3	221	1.2	0	0	1	2	9	0	0	0	0	0	9.46	196	5.07	205	61.5	0	0	0
NMG547101	1.66	0	242	1	1	0	0	0	0	1	0	9	9	5	247	1.65	0	0	1	5	4	1	0	0	0	0	10.22	307	1.04	146	43.2	0	0	0
NMG547729	2	1	222	1	1	0	0	0	0	1	0	8	9	5	227	1.92	0	1	1	2	24	0	0	0	0	0	6.31	211	4.12	164	48.1	0	0	0
NMG550795	0.8	0	188	0	0	0	0	0	0	0	2	8	9	45	233	1.33	1	1	1	1	41	0	1	1	1	2	24.67	145	3.34	95	30.6	0	0	0
NMG551612	2.42	1	270	1	1	0	0	0	0	0	0	9	9	3	273	2.4	0	0	1	2	8	0	0	0	0	0	8.54	219	4.93	190	53.5	0	0	0
NMG551691	2.5	0	267	1	1	0	0	0	0	0	0	9	9	3	270	3.29	1	0	1	3	6	0	0	0	0	0	12.01	229	5.09	194	53.9	0	0	0
NMG551746	1.03	0	197	0	0	0	0	1	0	1	0	9	9	17	214	1.14	0	0	1	1	50	0	0	0	1	1	16.38	272	3.52	142	42.1	0	0	0
NMG551929	1.35	0	219	0	1	1	0	1	0	0	0	8	8	9	228	1.35	0	1	1	1	36	0	0	0	0	0	6.24	249	3.78	146	41	0	0	0
NMG552222	2.9	1	274	0	0	0	0	0	0	0	0	9	9	17	291	3.85	1	0	1	1	5	0	0	0	0	0	7.71	492	3.77	128	38.2	0	0	0
NMG552794	0.98	1	188	0	0	0	0	0	0	0	0	8	9	44	232	1.36	1	0	1	1	31	0	0	0	1	2	9.21	183	3.81	114	33.8	1	0	0
NMG552955	0.9	1	196	1	1	0	0	0	0	0	2	8	9	19	215	1.13	0	0	1	2	30	1	1	0	0	0	3.74	215	2.45	89	25.9	0	0	0
NMG553156	2.16	0	241	1	0	0	0	0	2	0	1	9	5	11	252	2.07	1	0	1	3	31	0	0	0	0	0	20.81	46	4.28	143	41.7	0	0	0
NMG553505	0.97	1	198	1	1	0	0	0	0	0	0	9	9	30	228	1.17	0	1	1	1	48	0	0	0	0	0	7.78	324	2.78	99	29.8	0	0	0
NMG553723	1.63	0	229	0	0	0	0	1	0	1	0	9	9	15	244	1.83	0	0	1	1	17	0	0	0	0	0	7.76	349	3.8	136	38.8	0	0	0
NMG553953	1.42	0	212	1	0	0	0	1	0	0	0	9	9	16	228	1.6	0	0	1	1	20	0	0	0	0	0	6.08	301	3.32	119	35	0	0	0
NMG554058	0.98	0	195	1	0	0	0	1	0	0	2	7	8	15	210	1.13	0	0	1	1	15	1	1	0	0	0	7.39	145	3.36	140	41.8	0	0	0
NMG554145	2.02	1	235	1	0	0	0	0	0	0	0	9	9	17	252	2.12	0	0	1	1	23	0	0	0	0	0	11.21	352	3.56	134	34.4	0	0	0
NMG554147	2.14	1	268	1	0	0	0	0	0	0	0	9	9	8	276	2.17	1	0	1	2	14	0	0	0	0	0	4.53	123	3.86	146	43.3	0	0	0
NMG554176	2.22	1	266	0	0	0	0	0	0	0	0	9	9	25	291	2.4	1	1	1	1	14	0	0	1	0	0	5.69	110	3.52	112	33.3	0	0	1
NMG554791	1.55	1	233	1	1	0	0	0	0	0	0	9	9	18	251	1.69	0	0	1	3	58	0	0	0	0	0	7.4	400	3.56	129	38.2	0	0	0
NMG554905	1.38	1	206	1	1	0	0	0	0	0	1	7	9	7	213	1.32	0	0	1	1	58	0	0	0	0	0	9.32	257	5.08	226	65.6	0	0	0
NMG555144	1.66	0	227	1	0	0	0	0	1	0	0	9	9	5	232	1.61	0	0	1	1	23	0	0	0	0	0	8.7	353	4.23	152	44.6	0	0	0
NMG555497	1.1	1	210	0	0	0	0	0	0	0	0	9	9	50	260	1.93	1	0	1	1	37	0	0	0	1	2	6.49	410	3.56	107	33.2	1	0	0
NMG555607	1.28	0	227	1	1	0	0	0	0	0	0	9	9	13	240	1.38	0	0	1	5	31	0	0	0	0	0	5.66	182	4.75	183	53.2	0	0	0
NMG556029	3.05	0	264	1	1	0	1	0	0	0	0	9	9	8	272	2.81	1	0	1	6	11	0	0	0	0	0	15.42	194	5.14	196	55.1	0	0	0
NMG556282	2.82	0	283	0	0	0	0	0	0	0	0	9	9	15	298	2.84	1	0	1	1	24	0	0	0	0	0	8.99	619	2.48	86	25.7	0	0	0
NMG556410	1.21	1	227	1	1	0	0	0	0	0	0	9	9	11	238	1.21	0	0	1	1	19	0	0	0	0	0	7.81	257	4.75	181	54.2	0	0	0
NMG556626	1.24	0	203	0	0	0	0	0	0	0	0	9	9	21	224	1.43	0	1	1	1	49	0	0	0	0	0	5.12	202	2.91	102	29.1	0	0	0
NMG556746	1.49	1	235	1	0	0	0	0	0	1	0	9	9	2	237	1.52	0	0	1	1	10	1	0	1	0	0	7.08	151	5.15	203	59.7	0	1	0
NMG556748	2.09	1	235	1	0	0	0	0	0	1	0	9	9	2	237	2.04	0	0	1	1	4	0	0	0	0	0	5.19	139	5.45	210	59.5	0	1	0
NMG557489	1	1	201	0	0	0	0	0	0	0	0	9	9	20	221	1.16	0	0	1	1	50	0	0	0	0	0	7.06	180	4.92	162	48.7	1	0	0
NMG557546	1.24	1	212	0	0	0	0	1	0	1	0	9	9	11	223	1.25	0	1	1	1	40	0	0	0	0	0	15.17	253	3.78	133	39.2	0	0	0
NMG557705	1.63	0	247	0	0	0	0	1	0	1	0	9	9	2	249	2.4	0	0	1	3	5	0	0	0	0	0	12.41	285	4.93	172	50.6	0	0	0
NMG557727	2.12	0	259	1	0	0	0	0	0	0	0	9	9	5	264	1.93	0	0	1	3	37	0	0	0	0	0	5.24	186	5.02	187	52.5	0	0	0
NMG557880	3.35	1	282	0	0	0	0	0	0	0	1	6	9	6	288	3.28	1	0	1	6	9	0	0	0	0	0	6.52	260	4.11	149	43	0	0	0
NMG559320	1.49	1	237	1	1	0	0	0	0	1	0	9	9	4	241	1.44	0	0	1	1	28	0	0	0	0	0	3.98	178	6.2	210	58.8	0	0	0
NMG560191	1.36	0	220	0	0	0	0	1	0	0	0	9	9	14	234	1.36	0	0	1	1	16	0	0	0	0	0	23.15	692	5.43	199	58.5	0	0	0
NMG560660	0.97	1	214	1	1	0	0	0	0	0	0	9	9	40	254	1.42	0	1	1	4	43	0	0	0	0	0	3.49	148	3.11	104	31	1	0	0
NMG560743001	1.65	1	234	1	1	0	0	0	0	0	0	9	9	8	242	1.69	1	0	1	6	4	0	1	0	0	0	19.34	12	2.84	100	29.7	1	0	1
NMG560911002	2.69	1	245	1	1	0	0	0	0	0	0	9	9	24	269	2.83	0	0	1	16	15	0	0	0	0	0	12.51	556	4.5	157	45.7	0	0	0
NMG561428002	1.83	1	219	1	0	0	0	1	2	0	0	9	9	36	255	2.4	1	0	1	30	13	0	0	0	0	0	9.47	371	2.82	96	31.1	0	0	0
NMG562178	1.78	1	222	1	1	0	0	1	0	0	0	9	9	3	225	1.75	0	1	1	2	20	0	0	0	0	0	5.41	210	3.64	137	39.3	0	0	0
NMG562425	3.14	1	283	0	0	1	0	0	0	0	0	9	9	5	288	3.02	1	0	1	4	9	0	1	0	0	0	13.98	380	3.85	140	39.5	0	0	0
NMG562493	0.99	0	211	1	1	0	0	0	0	0	0	9	9	38	249	1.56	0	1	1	1	28	0	1	0	0	0	8.65	352	3.05	99	30.6	0	0	0
NMG563309	1.39	0	238	1	1	0	0	0	0	0	0	9	9	4	242	1.39	0	1	1	1	7	0	0	0	0	0	4.92	124	7.59	271	79.5	0	0	0
NMG563450	2.5	1	239	1	0	0	0	0	2	0	0	9	9	12	251	2.37	1	0	1	12	9	0	0	0	0	0	6.52	382	3.71	126	37.4	0	0	0
NMG564664	1.61	0	232	1	0	0	0	1	0	0	0	9	9	8	240	1.62	0	1	1	1	17	0	0	0	0	0	11.18	252	4.53	163	48	0	0	0
NMG564762	1.15	1	224	1	1	0	1	0	0	1	0	8	9	37	261	1.59	0	0	1	3	38	0	0	0	0	0	7.04	271	3.43	108	31.9	1	0	0
NMG564868	1.23	0	203	1	0	0	0	1	0	1	1	8	9	13	216	1.36	0	0	1	1	29	1	0	0	1	2	12.5	550	3.86	134	41	0	0	0
NMG565554	0.8	1	204	1	0	0	0	0	0	1	2	3	5	5	209	0.78	0	1	1	1	50	1	0	0	1	2	4.63	90	5.76	234	67.2	0	0	0
NMG566622	1.2	0	201	1	0	0	0	1	0	0	0	9	9	12	213	1.2	0	0	1	1	56	1	0	0	0	0	15.46	214	3.32	124	37.6	0	0	1
NMG567095	1.25	1	203	1	1	1	0	0	1	1	2	9	9	10	213	1.31	0	1	1	4	11	1	1	0	0	0	6.2	324	4.19	144	42.4	0	0	0
NMG567118	2.09	1	236	1	0	0	0	1	0	0	0	9	9	9	245	2.05	0	0	1	1	10	0	0	0	0	0	7.09	279	4.81	166	49.1	0	0	0
NMG568003	1.03	0	206	1	0	0	0	0	0	0	0	9	9	13	219	1.07	0	1	1	3	43	0	0	0	0	0	5.75	216	3.7	139	42.5	0	0	0
NMG570882	1.11	1	194	0	0	0	0	0	0	0	0	8	9	45	239	1.6	0	1	1	1	42	1	0	0	1	1	9.84	366	3.3	93	28.1	0	0	0
NMG571390	0.94	0	212	1	1	0	0	0	0	0	2	5	8	25	237	1.04	0	1	1	1	43	0	0	0	0	0	6.56	268	2.55	86	25.7	0	0	0
NMG571457	1.3	1	214	1	1	0	0	0	0	0	1	9	9	2	216	1.27	0	1	1	1	35	1	1	0	0	0	6.19	140	4.83	173	50.4	0	0	0
NMG572117	1.49	1	223	1	1	0	1	0	0	0	0	9	9	18	241	1.55	0	0	1	1	35	0	0	0	0	0	15.61	287	4.69	171	50.3	0	0	0
NMG572574	1.83	1	253	1	1	0	0	0	0	0	0	9	9	6	259	1.82	0	1	1	5	15	0	0	0	0	0	12.69	142	4.01	159	54	0	0	0
NMG572779	2	1	229	1	0	0	0	1	0	0	1	7	9	14	243	1.91	0	0	1	1	20	0	0	0	0	0	12.71	354	3.99	133	41.4	1	0	0
NMG572856	2.45	1	251	1	0	0	1	0	0	0	0	9	9	5	256	2.41	0	0	1	3	3	0	0	0	0	0	6.92	235	4.54	167	48.4	0	0	0
NMG574346	1.55	0	217	1	0	1	0	1	0	0	0	9	9	20	237	1.97	1	1	1	1	22	0	0	0	0	0	10.16	414	2.87	98	30.1	1	0	0
NMG575641	1.15	0	207	1	0	0	0	0	0	0	0	8	9	22	229	1.25	0	1	1	1	37	0	0	0	0	0	10.94	498	2.69	91	26.4	1	0	0
NMG577198	1.33	1	222	1	0	0	0	1	0	0	0	9	9	13	235	1.36	0	0	1	2	14	0	0	0	0	0	12.84	401	3.54	129	38.2	0	0	0
NMG577199	1.4	1	222	1	0	0	0	1	0	0	3	6	7	18	240	1.51	0	0	1	2	20	0	0	0	0	0	16.62	438	4.36	149	45.2	0	0	0
NMG578388	1.48	0	238	1	1	0	0	0	0	0	0	9	9	4	242	1.3	0	0	1	3	11	0	0	0	0	0	6.48	180	5.48	201	61.4	0	0	0
NMG578788	3.08	1	267	1	0	0	0	0	0	0	0	9	9	11	278	2.48	1	1	1	9	15	1	0	0	0	0	30.97	724	4.78	175	49.4	0	0	0
NMG579698	1.25	1	214	1	1	0	0	0	0	0	1	5	8	10	224	1.22	0	1	1	1	21	0	0	0	0	0	11.36	411	3.29	133	38.4	0	0	0
NMG580526	1.44	0	209	0	0	0	0	1	0	0	0	9	9	8	217	1.4	0	0	1	3	20	0	0	0	0	0	28.33	311	4.37	141	44.3	1	0	0
NMG585054	1.76	1	229	0	0	0	0	0	0	0	0	8	9	8	237	1.74	0	1	1	2	19	0	0	0	0	0	7.63	442	4.71	168	48.4	0	0	0
NMG585713	1	0	212	0	0	0	0	1	0	0	1	5	9	25	237	1.19	1	0	1	1	19	0	0	0	0	0	7.55	325	3.62	121	35.8	1	0	0
NMG585784	3	1	247	1	0	0	0	0	0	0	0	9	9	11	258	3.18	1	0	1	11	10	0	0	0	0	0	12.62	466	3.55	132	38.2	0	0	0
NMG585903	1.5	1	222	1	1	0	0	0	0	0	0	9	9	2	224	1.48	0	0	1	1	22	0	0	0	0	0	8.38	212	5.11	200	58.7	0	0	0
NMG587354	1.4	1	215	1	0	0	0	1	0	1	0	9	9	28	243	1.65	1	0	1	1	16	0	0	0	0	0	12.23	351	4.17	146	42.5	0	0	0
NMG587763	3.01	1	275	1	0	0	0	0	0	0	0	9	9	2	277	2.98	0	1	1	2	5	0	0	0	0	0	17.01	212	4.82	179	54.8	0	0	0
NMG588291	1.2	1	227	1	1	0	0	0	1	0	1	7	9	27	254	1.55	1	1	1	2	24	1	0	0	0	0	7.22	177	2.81	95	29.2	0	0	0
NMG588537	0.99	1	226	1	1	0	1	0	0	0	0	9	9	14	240	1.08	0	1	1	1	28	1	0	0	1	1	8.12	332	2.86	111	34.2	0	0	0
NMG588663	1.24	1	225	1	1	1	0	0	0	0	2	9	9	3	228	1.22	0	1	1	1	53	0	0	0	0	0	9.27	126	5.12	212	61	0	0	0
NMG588984	1.17	0	207	0	0	0	0	1	0	0	1	8	9	15	222	1.15	0	0	1	1	21	1	0	0	1	2	19.02	208	4.08	152	44.1	0	0	0
NMG589283	1.64	1	238	1	0	0	0	0	0	0	0	9	9	3	241	1.63	0	0	1	1	11	0	0	0	0	0	11.33	147	4.49	178	52.7	0	0	0
NMG589690	1.1	0	208	1	0	0	0	0	0	0	2	5	8	20	228	1.33	0	1	1	1	18	0	0	0	0	0	10	144	3.13	113	34.1	0	0	0
NMG590383	1.59	0	229	1	0	0	0	1	0	1	0	9	9	4	233	1.59	0	1	1	4	8	0	0	0	0	0	9.82	316	4.42	169	49.3	0	0	0
NMG590892	0.8	0	196	0	0	0	0	1	0	0	0	9	9	41	237	1.67	0	1	1	1	27	0	0	0	1	1	3.81	259	3.95	127	39.2	1	0	0
NMG591875	1.78	1	222	0	0	0	0	0	0	0	0	8	8	27	249	2.2	0	0	1	1	31	1	1	0	1	2	11.29	183	2.6	84	24.6	0	0	0
NMG593360	3.03	1	279	1	1	0	0	0	0	0	1	7	9	4	283	2.88	1	0	1	4	14	1	1	1	0	0	19.32	255	4.88	174	49.9	0	0	1
NMG593796	1.26	1	216	1	1	0	0	0	1	1	0	9	9	9	225	1.27	0	1	1	1	14	0	0	0	1	1	7.76	217	3.92	150	44.2	0	0	0
NMG594127	1.2	1	205	0	0	0	0	1	0	0	0	8	8	23	228	1.57	0	0	1	1	15	0	0	0	0	0	3.83	366	2.3	86	25.6	0	0	0
NMG594249	1.6	0	218	0	0	0	0	1	0	0	0	9	9	22	240	1.76	1	0	1	1	16	0	0	0	0	0	11.57	589	3.37	118	35.6	0	0	0
NMG595074	1.26	1	212	0	0	0	0	1	0	0	1	8	9	33	245	1.79	0	1	1	1	22	0	0	0	0	0	6.41	214	2.27	77	23.1	1	0	0
NMG595868	1.68	1	219	0	0	0	0	0	0	0	0	9	9	14	233	1.68	0	1	1	2	39	0	0	0	1	1	8.21	465	4.02	139	40.1	0	0	0
NMG596200	1.93	0	242	1	0	0	0	1	0	1	0	9	9	11	253	2.01	0	0	1	1	6	0	0	0	0	0	13.55	457	3.99	133	38.2	0	0	0
NMG596201	1.97	0	242	1	0	0	0	1	0	0	0	9	9	10	252	2.08	0	0	1	1	24	0	0	0	0	0	3.2	318	4.04	139	43.5	0	0	0
NMG596775	1.94	0	222	1	1	0	0	0	0	0	0	9	9	21	243	2.07	0	0	1	1	23	0	0	0	0	0	6.51	164	4.21	146	43.8	0	0	0
NMG597624	1.46	1	241	1	0	0	0	0	0	0	0	9	9	3	244	1.45	0	0	1	3	7	0	0	0	0	0	6.37	246	4.37	174	49.7	0	0	0
NMG598221	1.65	1	224	1	0	0	0	1	0	0	0	9	9	9	233	1.6	0	1	1	1	13	0	0	0	0	0	11.91	334	4.8	169	49.5	0	0	0
NMG598865	1.67	1	228	1	0	0	0	0	0	0	0	9	9	6	234	1.6	1	0	1	1	4	0	0	0	0	0	6.32	135	4.7	176	53.1	0	0	0
NMG601321	2.21	0	256	1	0	0	0	0	0	0	0	9	9	10	266	2.08	0	1	1	2	26	0	0	1	0	0	6.29	371	4.23	163	48.7	0	0	1
NMG601613	1.58	1	220	0	0	0	0	1	0	1	0	9	9	5	225	1.54	0	1	1	2	10	1	0	0	0	0	15.01	388	3.15	116	33.4	0	0	0
NMG601685	1.37	0	260	1	1	0	0	0	0	0	0	9	9	7	267	1.41	0	1	1	5	7	1	0	0	0	0	4.62	199	3.55	128	38.6	0	1	0
NMG601884	2.4	1	249	1	1	0	0	0	0	0	0	9	9	2	251	2.33	0	0	1	10	1	0	0	0	0	0	11.62	230	6.01	190	57.4	0	0	0
NMG603080	1.2	1	203	1	1	0	0	0	0	0	0	9	9	41	244	1.84	1	1	1	2	21	0	0	0	1	2	8.46	438	2.49	80	24.3	0	0	0
NMG603176	4.36	0	268	1	1	0	0	0	0	0	0	9	9	5	273	4.4	1	0	1	1	26	1	0	0	0	0	7.14	218	5.9	214	61.3	0	0	0
NMG603514	1.15	1	239	1	0	0	0	0	0	1	0	9	9	18	257	1.25	0	0	1	18	18	1	0	0	0	0	8.48	173	3.14	111	33.4	0	0	0
NMG604147	3.4	1	282	0	0	0	0	0	0	0	0	9	9	17	299	3.4	1	1	1	16	8	0	0	0	0	0	6.91	548	4.46	147	42.9	0	0	0
NMG604648	0.85	1	194	1	1	0	0	0	0	0	0	8	9	11	205	0.85	0	1	1	2	28	1	0	0	0	0	16.84	353	3.9	152	42.9	0	0	0
NMG604737	2	1	231	0	0	0	0	0	0	0	0	9	9	10	241	1.87	1	0	1	9	8	0	0	0	0	0	12.49	534	3.19	117	34.9	0	0	0
NMG605311	0.88	0	190	0	0	0	0	1	0	0	1	7	9	18	208	0.9	0	1	1	1	27	1	0	0	0	0	12.87	284	3.04	108	32.3	0	0	0
NMG605578	1.83	1	212	1	0	0	0	1	0	1	0	9	9	11	223	1.87	0	1	1	1	19	1	0	0	0	0	9.93	332	4.09	142	41.9	0	0	0
NMG606724	1.32	1	203	1	1	0	0	0	0	1	0	9	9	45	248	1.78	0	1	1	1	14	0	0	0	0	0	7.82	285	3.59	111	31.6	1	0	0
NMG607443	2.09	1	235	0	0	0	0	0	0	0	0	9	9	9	244	1.96	1	1	1	8	13	0	0	0	0	0	11.49	402	3.81	145	42.4	0	0	0
NMG607905	2.14	1	250	1	1	0	0	0	0	0	0	9	9	3	253	2.21	0	0	1	13	7	0	0	0	0	0	10.16	378	4.05	136	40.1	0	0	0
QZ508747	0.99	0	235	1	1	0	0	0	0	0	0	8	9	9	244	1	0	0	1	1	23	1	0	0	0	0	10.3	356	3.7	141	43.2	0	0	0
QZ510576	1.5	1	248	1	0	0	0	1	0	0	0	10	10	16	264	1.75	1	0	0	16	7	0	0	0	0	0	10.4	304	3.83	134	38.5	0	0	0
QZ512607	2.55	1	249	1	0	0	0	0	0	0	0	10	10	6	255	2.68	1	0	0	6	8	0	0	0	0	0	8.7	327	3.46	124	38.8	0	0	0
QZ512652	2.9	1	256	1	0	0	0	0	0	0	0	9	10	5	261	3.1	0	1	0	6	6	0	0	0	0	0	12.3	328	4.69	162	48	0	0	0
QZ512896	2.4	1	242	1	0	0	0	1	0	0	0	9	10	13	255	2.5	0	1	0	13	7	0	0	0	0	0	10.8	524	3.7	130	36.7	0	0	0
QZ513255	1.09	1	186	0	0	0	0	1	0	1	1	5	7	6	192	1.02	0	0	1	1	31	0	0	0	1	3	27.34	236	4.26	167	48.2	0	0	0
QZ513303	1.1	0	200	0	0	0	0	0	0	1	0	8	9	11	211	1.05	0	1	1	1	19	1	0	0	0	0	8.3	219	3.14	110	32.1	0	0	0
QZ513519	1.3	1	214	1	0	0	0	1	0	1	0	8	9	9	223	1.25	0	1	1	9	6	0	0	0	0	0	10.7	191	3.89	142	40.6	0	0	0
QZ514120	2	1	263	1	0	0	0	0	0	0	0	8	9	5	268	2	1	0	0	5	19	0	0	0	0	0	6.7	139	4.7	156	45.3	0	0	0
QZ514728	2.45	0	267	0	0	0	0	0	0	0	0	10	10	5	272	2.31	0	0	0	5	16	0	0	0	0	0	11.1	100	4.57	173	51.1	0	0	0
QZ514823	1.465	0	216	1	1	0	0	0	0	1	0	8	9	15	231	1.63	0	0	0	1	19	0	0	0	0	0	9.2	334	3.94	142	42.6	0	0	0
QZ514895	1	0	202	1	0	0	0	0	0	1	0	10	10	36	238	1.67	1	0	1	1	32	1	1	0	0	0	3.5	327	2.92	96	28.9	0	0	0
QZ517068	1.55	0	205	1	0	0	0	0	0	0	1	8	9	10	215	1.6	1	1	1	1	24	0	0	0	0	0	9.7	468	4.25	145	44.2	0	0	0
QZ517461	0.8	0	192	0	0	0	0	1	0	1	0	8	10	32	224	1.22	1	0	1	1	37	1	0	0	1	3	6.7	265	3.4	108	31.5	1	0	0
QZ517666	2.6	1	251	0	0	0	0	0	0	0	0	10	10	8	259	2.33	0	0	0	3	7	1	0	0	0	0	10.8	359	4.27	149	42.8	0	0	0
QZ518034	2	1	263	0	0	0	0	0	0	0	0	8	9	6	269	2.07	0	0	0	5	10	0	0	0	0	0	4.6	162	3.96	145	42.4	0	0	0
QZ518430	0.6	1	171	0	0	0	0	0	2	1	2	5	8	15	186	0.59	0	1	1	1	22	1	0	0	0	0	18.7	321	2.83	105	31.2	0	0	0
QZ518696	2.15	0	253	1	0	0	0	0	0	0	0	9	10	7	260	2.29	1	1	0	7	6	0	0	0	0	0	14.3	395	3.99	137	39.2	0	0	0
QZ519106	2.1	0	253	1	0	0	0	0	0	0	0	9	10	8	261	2.16	1	0	0	10	10	0	0	0	0	0	12.8	554	4.58	156	46.3	0	0	0
QZ519391	0.8	1	211	1	1	0	0	0	0	1	2	8	8	20	231	1.08	0	1	1	1	35	1	0	0	1	3	10.3	92	2.29	76	23.4	0	0	0
QZ519546	3.3	1	268	0	0	0	0	0	0	0	0	10	10	2	270	3.16	1	0	0	2	7	0	0	0	0	0	9.6	287	4.9	170	49.1	0	0	0
QZ520955	1.55	1	214	1	0	0	0	0	0	1	0	8	9	25	239	1.88	1	0	1	1	22	0	0	0	0	0	3	396	4.19	125	38.2	0	0	1
QZ521451	0.75	0	191	0	0	0	0	0	0	0	0	9	10	25	216	0.97	0	1	1	12	45	1	1	1	1	3	2.3	146	4.87	154	47.4	1	0	1
QZ521634	1.7	1	215	1	0	0	0	0	1	1	2	6	9	13	228	1.8	0	1	1	2	16	0	0	0	1	3	9.4	286	2.89	96	29.1	0	0	0
QZ522071	3.18	1	266	1	0	0	0	0	0	0	0	10	10	2	268	3.18	1	0	0	2	15	0	0	0	0	0	6.6	306	4.06	144	43.2	0	0	0
QZ523275	1.65	0	253	1	0	0	0	0	0	0	1	5	8	5	258	1.65	0	1	1	1	25	1	0	0	0	0	7.4	188	3.82	146	42.8	0	0	1
QZ523387	3.7	1	265	1	0	0	0	0	0	0	0	9	10	3	268	3.57	0	0	0	3	13	0	0	0	0	0	12.9	208	4.97	156	48.2	0	0	0
QZ524797	1.58	0	210	0	0	0	0	1	0	0	0	10	10	13	223	1.56	1	0	1	13	6	0	0	0	0	0	16.8	395	3.87	131	38.6	0	0	0
QZ524946	2.5	1	251	1	1	0	0	0	0	0	0	9	10	7	258	2.64	1	0	0	7	10	0	0	0	0	0	13.8	168	4.62	166	46.7	0	0	0
QZ525515	2.6	1	250	0	0	0	0	0	0	0	0	10	10	9	259	2.48	1	0	1	9	5	0	0	0	0	0	14.1	555	3.65	129	37	0	0	0
QZ526852	0.99	1	183	0	0	0	0	1	0	1	0	8	8	42	225	1.5	1	1	1	1	60	0	0	0	1	3	5.7	489	2.53	88	27.1	0	0	0
QZ527218	1.8	1	211	0	0	0	0	0	0	1	0	9	9	12	223	1.85	0	0	1	1	25	1	0	0	0	0	8.5	398	3.61	121	34.2	0	0	0
QZ527225	2.2	0	272	0	0	0	0	0	0	0	0	9	9	3	275	2.11	0	0	0	3	8	0	0	0	0	0	5.8	190	5.53	200	56.9	0	0	0
QZ527800	1.95	1	232	0	0	0	0	1	0	0	0	9	10	10	242	1.95	0	0	0	10	8	0	0	0	0	0	6.4	339	4.83	182	51.2	0	0	0
QZ529969	1.22	0	202	1	0	0	0	0	1	1	3	2	8	1	203	1.22	0	1	1	1	29	0	0	0	0	0	14.1	101	3.78	140	41.2	0	0	0
QZ530167	1.15	0	211	0	0	0	0	0	0	0	0	8	9	13	224	1.21	0	1	1	1	17	0	0	0	0	0	7.3	233	3.42	126	37.1	0	0	0
QZ531205	1.67	1	213	0	0	0	0	1	0	1	0	10	10	15	228	1.9	0	1	1	1	18	0	0	0	0	0	7.8	323	4.33	150	43.1	0	0	0
QZ532990	1.85	0	240	1	0	0	0	0	0	1	0	8	9	7	247	1.89	0	0	1	7	8	0	0	0	0	0	15.4	430	4.04	142	42.2	0	0	0
QZ533831	1.5	0	268	1	0	0	0	0	0	0	0	9	10	5	273	1.7	0	0	0	5	12	0	0	0	0	0	12.1	217	5.41	177	51	0	0	0
QZ535368	2.65	1	266	0	0	0	0	0	0	0	0	10	10	3	269	2.68	0	0	0	3	10	0	0	0	0	0	9.1	210	5.04	180	50.1	0	0	0
QZ536864	2.9	0	280	1	0	0	0	0	0	0	0	10	10	4	284	2.9	0	0	0	4	11	0	0	0	0	0	16.4	209	4.82	162	47.3	0	0	0
QZ538024	1.6	0	244	1	1	0	0	0	0	0	1	7	10	12	256	1.69	0	0	0	12	6	0	0	0	0	0	13	283	4.29	149	43.2	0	0	0
QZ538375	3.25	0	266	1	0	0	0	0	0	0	2	4	8	5	271	3.66	0	0	0	5	7	0	0	0	0	0	16	280	4.12	144	41.4	0	0	0
QZ538556	1.8	1	219	1	0	0	0	1	0	1	0	7	9	15	234	1.93	1	1	1	1	19	0	0	0	0	0	12.2	353	3.77	131	36.9	0	0	0
QZ543969	2.75	0	263	0	0	0	0	1	0	0	0	10	10	3	266	2.7	0	0	0	3	7	0	0	0	0	0	13	285	4.32	149	43.6	0	0	0
QZ544651	3.4	1	275	0	0	0	0	0	0	0	0	10	10	2	277	3.31	1	1	0	2	10	0	0	0	0	0	10.5	263	4.39	147	45.2	0	0	0
QZ544818	2.4	0	245	1	0	0	0	0	0	0	1	7	8	11	256	2.2	1	1	0	11	6	0	0	0	0	0	9.6	500	4.11	140	42.7	0	0	0
QZ545643	2.23	0	254	0	0	0	0	0	0	0	0	9	10	6	260	2.37	0	0	0	6	8	0	0	0	0	0	12.7	209	4.47	146	44	0	0	0
QZ546463	3.4	0	266	0	0	0	0	1	0	0	0	10	10	8	274	3.45	1	0	0	8	8	0	0	0	0	0	15.5	374	5.38	187	55.1	0	0	0
QZ547508	2.35	1	265	0	0	0	0	0	0	0	0	10	10	8	273	2.44	1	0	0	7	6	0	0	0	0	0	13.3	279	4.72	159	47.4	0	0	0
QZ548074	3.75	1	280	0	0	0	0	0	0	0	0	10	10	4	284	3.61	0	0	0	4	10	0	0	0	0	0	14	257	4.95	167	48.9	0	0	0
QZ548166	1.1	0	187	0	0	0	0	1	0	1	0	8	9	41	228	1.84	1	0	1	40	11	1	0	0	1	1	3.6	370	3.31	99	30.3	0	0	0
QZ548528	1.6	0	221	0	0	0	0	0	0	0	1	6	8	9	230	1.58	0	1	1	9	8	1	0	0	0	0	18.3	314	4.12	145	42.4	0	0	0
QZ548855	1	1	187	0	0	0	0	0	1	0	0	8	9	8	195	1.01	0	1	1	1	12	1	1	1	0	0	19.6	24	2.21	82	25.2	0	1	0
QZ550986	2.6	1	246	0	0	1	0	0	1	0	0	9	10	11	257	2.6	1	0	0	10	10	0	0	0	0	0	16	243	3.93	133	38.4	0	0	0
QZ551230	3.25	1	256	1	0	0	0	1	0	0	0	8	9	35	291	3.4	1	1	0	1	41	1	0	0	0	0	4.9	159	4	122	36	1	0	0
QZ551354	0.92	1	197	1	0	0	0	1	0	1	2	8	8	19	216	1.1	1	1	1	1	52	0	1	0	0	0	11.7	334	3.21	101	30.7	0	0	1
QZ551411	2.01	0	259	1	0	0	0	0	0	1	0	10	10	6	265	2	0	0	0	5	23	0	0	0	0	0	7.6	195	5.35	186	55.3	0	0	0
QZ551659	2.5	1	253	1	0	0	1	0	0	1	0	10	10	5	258	2.49	0	0	0	4	7	0	0	0	0	0	10	227	3.64	130	37.5	0	0	0
QZ551660	1.99	1	253	1	0	0	1	0	0	1	0	9	9	5	258	1.95	0	0	0	4	35	0	0	0	0	0	3.2	186	5.12	181	54.1	0	0	0
QZ552028	1.2	1	198	0	0	0	0	0	0	1	1	6	7	5	203	1.16	0	0	1	1	38	1	1	0	0	0	12.5	207	2.95	134	36.2	0	1	1
QZ553340	2.7	1	268	0	0	0	0	0	0	1	0	10	10	2	270	2.45	2	0	0	3	29	0	0	0	0	0	4.9	225	5.42	178	51.5	0	0	0
QZ553541	0.8	0	216	0	1	0	0	1	0	1	0	9	9	6	222	0.8	0	0	1	2	20	0	0	0	0	0	9.3	150	3.81	140	41.8	0	0	0
QZ554021	1.4	1	201	0	0	0	0	0	0	1	0	9	9	14	215	1.43	1	0	1	13	18	0	0	0	0	0	4.6	541	3.11	91	28.5	0	0	0
QZ555043	2.7	1	246	1	0	0	0	1	0	1	0	10	10	10	256	2.81	1	0	0	1	10	0	0	0	0	0	14.8	425	3.78	124	36.4	0	0	0
QZ555204	0.58	1	166	0	0	0	0	0	0	1	1	6	9	81	247	1.6	1	1	1	1	121	0	0	1	1	3	3.6	50	3.27	95	29.8	1	0	1
QZ555977	1.19	0	218	1	0	0	1	1	0	1	2	8	9	40	258	1.94	1	1	1	43	58	0	0	1	1	1	5	424	3.14	96	30.4	0	0	1
QZ556395	1.8	1	245	1	0	0	0	0	0	1	0	8	9	14	259	2.03	1	0	0	13	14	1	0	0	0	0	3.9	142	3.37	113	35.7	0	0	0
QZ556754	2.3	1	265	1	0	0	0	0	0	1	1	7	10	7	272	2.33	2	0	0	6	41	0	0	0	0	0	8.9	262	2.67	95	28.3	0	0	0
QZ557835	1.6	0	220	1	0	0	0	0	2	1	0	8	9	18	238	1.6	1	0	1	1	15	0	0	0	0	0	10.2	338	3.34	117	33.6	0	0	0
QZ558157	1.4	1	234	1	0	0	0	1	0	1	1	6	8	24	258	1.83	0	0	0	1	8	0	0	0	0	0	16.7	371	3.39	117	33.8	0	0	0
QZ559475	2.25	0	238	0	0	0	0	1	0	1	0	9	9	16	254	2.27	0	0	0	15	6	0	0	0	0	0	11.1	506	3.24	109	32.8	0	0	0
QZ559520	1.43	0	210	1	0	0	0	0	2	1	2	5	8	4	214	1.35	0	0	1	1	11	0	0	1	0	0	7.9	209	4.24	152	46.5	0	0	1
QZ560112	0.91	0	210	1	1	0	0	0	0	1	0	8	9	29	239	1.35	0	0	1	1	55	1	0	0	0	0	3.5	213	3.28	122	37.3	0	0	1
QZ560131	0.75	0	201	1	1	0	0	0	0	1	0	8	9	31	232	1.14	0	0	1	1	50	0	0	0	0	0	5.2	267	3.39	116	37.1	0	0	0
QZ560330	1.47	1	209	1	0	0	0	1	0	1	0	8	9	22	231	1.9	0	0	1	1	28	1	0	0	0	0	8	217	3.38	119	35.6	0	0	0
QZ560414	1.51	0	223	0	0	0	0	0	0	1	0	10	10	14	237	1.61	0	0	0	17	13	0	0	0	0	0	6.6	375	2.38	83	24.9	0	0	0
QZ561005	1.48	1	208	1	0	0	0	0	0	1	0	10	10	2	210	1.4	0	0	1	2	13	0	0	0	0	0	11.6	163	3.62	135	41.3	1	0	0
QZ561287	1.15	0	228	1	1	0	0	0	0	1	0	8	9	17	245	1.46	0	0	1	16	17	1	0	0	0	0	4.5	207	3.64	136	41.2	0	0	0
QZ561487	2.4	1	237	1	0	0	0	1	0	1	0	8	9	11	248	2.41	0	0	0	1	16	0	0	0	0	0	33	291	3.9	140	41.6	0	0	0
QZ563126	1.185	1	197	1	0	0	0	1	0	1	0	8	9	17	214	1.18	0	1	1	1	23	0	0	0	1	3	4	277	2.64	100	28.1	0	0	0
QZ563489	0.82	1	180	0	0	0	0	1	0	1	2	6	8	12	192	0.76	0	1	1	1	28	0	1	1	1	3	36	27	4.2	101	31.8	1	0	0
QZ565612	1.6	0	224	1	0	0	0	0	1	1	0	9	10	25	249	1.9	1	0	1	1	14	0	0	0	0	0	8.4	608	3.55	124	36.8	0	0	0
QZ566074	2.05	1	229	0	0	0	0	1	0	1	0	10	10	13	242	2.13	1	0	0	1	43	0	1	0	0	0	10.4	312	4.87	169	49.2	0	0	1
QZ567195	2	0	230	1	0	0	0	0	2	1	0	9	9	18	248	2.15	0	0	0	17	8	0	0	0	0	0	14.3	441	3.66	129	38.2	0	0	0
QZ569760	3.27	1	284	0	0	0	0	0	0	1	0	8	10	1	285	3.18	0	0	0	2	32	1	0	0	0	0	13.7	245	5.55	192	57	0	0	0
QZ570982	2.25	1	268	0	0	0	0	0	0	0	0	10	10	2	270	2.27	0	0	0	6	4	0	0	0	0	0	18.9	309	4.67	165	46.5	0	0	0
QZ571382	1.68	1	212	1	0	0	0	0	0	1	0	8	9	22	234	2.01	1	0	1	1	13	0	0	0	0	0	10.4	459	4.56	155	45.8	0	0	0
QZ574079	1	0	188	0	0	0	0	0	0	1	2	4	7	27	215	1.13	0	1	1	1	46	0	1	1	0	0	12.3	325	2.92	99	29.7	0	0	1
QZ574895	3.2	1	260	1	0	0	0	0	0	1	1	5	9	3	263	3.07	2	0	0	3	16	0	1	1	0	0	3.6	194	3.98	145	43	0	0	1
QZ575945	1.15	1	203	1	0	0	0	0	2	1	2	5	8	52	255	2.5	1	0	1	1	47	1	0	0	0	0	4.8	350	3.08	95	28.5	0	0	0
QZ576255	1.82	1	218	1	0	0	0	1	0	1	0	10	10	21	239	2.13	1	0	0	1	14	0	0	0	0	0	13.6	451	4.37	147	43.1	0	0	0
QZ578484	4.02	0	264	0	0	0	0	1	0	1	1	7	9	11	275	4	1	0	0	1	13	0	0	0	0	0	15.1	692	3.33	113	33.3	0	0	0
QZ578602	2.05	1	234	0	0	0	0	1	0	1	0	10	10	7	241	2.03	0	0	0	1	14	0	0	0	0	0	9.8	238	3.76	146	41.3	0	0	0
QZ578822	1.2	1	223	1	1	0	0	0	0	1	0	8	8	3	226	1.17	0	0	1	1	15	0	0	0	0	0	5.6	121	3.88	152	43.7	0	0	0
QZ579630	1.75	0	243	1	1	0	0	0	0	1	0	8	9	17	260	1.89	1	0	1	15	14	0	0	0	0	0	4.1	300	3.06	109	32.8	0	0	0
QZ580643	1.18	1	196	1	0	0	0	1	0	1	2	3	7	17	213	1.3	0	1	1	1	20	0	0	0	0	0	16.6	359	2.26	81	23.7	1	0	0
QZ580797	1.75	0	226	1	0	0	0	1	1	1	0	8	9	12	238	1.81	0	0	1	1	22	0	0	0	0	0	9.7	562	3.65	134	37.6	0	0	0
QZ580957	1.07	1	191	0	0	0	0	0	1	1	0	8	9	21	212	1.18	0	1	1	1	42	0	1	0	0	0	11.1	355	3.35	117	34.8	0	0	0
QZ581277	2.4	0	268	1	0	0	0	0	0	1	0	10	10	6	274	2.46	0	0	0	5	3	0	0	0	0	0	8.1	278	4.06	147	41.5	0	0	0
QZ581794	1.16	0	196	0	0	0	0	1	0	1	0	9	10	19	215	1.15	0	1	1	1	37	1	0	0	0	0	5.1	48	3.04	103	29.8	0	0	0
QZ581828	1.71	1	208	0	0	0	0	0	0	1	0	9	10	22	230	1.65	1	0	1	1	21	0	0	0	0	0	12.4	312	3.61	119	35.5	0	0	0
QZ581965	2.85	1	269	0	0	0	0	0	0	0	0	3	6	6	275	2.91	1	0	0	5	13	0	0	0	0	0	24.2	356	4.18	141	39.9	0	0	0
QZ582720	1.1	1	188	0	0	0	0	1	0	1	1	7	7	24	212	1.2	1	0	1	1	36	1	1	0	0	0	28.8	500	3.49	117	32.1	0	0	0
QZ583374	2.75	0	255	1	0	0	0	0	0	0	0	10	10	5	260	2.6	0	0	0	4	15	0	0	0	0	0	6.6	180	4.51	161	46.6	0	0	0
QZ583529	0.76	1	172	0	0	0	0	0	0	0	2	1	7	11	183	0.63	0	1	1	1	54	1	1	1	0	0	33.9	187	3.71	120	34.7	1	0	1
QZ584476	3.05	1	250	1	0	0	0	1	0	0	0	9	10	7	257	3.02	1	0	0	6	13	0	0	0	0	0	15	462	4.68	154	43.7	0	0	0
QZ585438	2.25	1	245	1	0	0	0	1	0	0	0	9	10	12	257	2.32	1	0	0	12	7	0	0	0	0	0	14	456	4.06	149	42.5	0	0	0
QZ585639	1.5	1	216	1	0	0	0	0	0	1	2	6	9	26	242	1.74	1	0	0	1	21	0	0	0	0	0	9.7	349	2.76	100	27.9	0	0	0
QZ586085	0.72	1	175	0	0	0	0	0	0	0	2	2	7	7	182	0.72	0	1	1	1	11	1	0	1	0	0	17	80	4.16	131	38.7	1	0	0
QZ586152	2.7	1	256	1	0	0	0	0	0	0	0	9	9	17	273	2.95	1	0	0	21	5	0	0	0	0	0	10.6	329	2.85	98	27.5	0	0	0
QZ587024	1.95	1	229	1	0	0	0	0	0	1	0	8	9	23	252	2.11	1	0	0	1	9	0	0	0	0	0	11.6	263	4.28	120	35.4	0	0	0
QZ587633	1.9	1	234	1	0	0	0	1	0	1	0	9	10	11	245	1.89	0	0	0	1	14	0	0	0	0	0	14	376	4.55	167	47.2	0	0	0
QZ589259	1.65	0	261	1	0	0	0	0	0	0	0	9	10	14	275	1.9	1	0	0	4	13	0	0	0	0	0	10.6	340	4.17	156	43.6	0	0	0
QZ590223	2.48	0	255	1	1	0	0	0	0	1	0	9	10	6	261	2.41	0	0	0	4	8	0	0	0	0	0	8.9	233	4.27	149	41.7	0	0	0
QZ590230	3.1	1	258	1	0	0	0	1	1	0	2	7	10	4	262	3	0	0	0	4	3	0	0	0	0	0	5.4	126	4.45	159	44.1	0	0	0
QZ590388	2.15	0	256	1	0	0	0	1	0	1	0	9	10	9	265	2.3	0	0	0	8	2	0	0	0	0	0	9.5	403	4.16	145	41.3	0	0	0
QZ590646	1.85	0	232	0	0	0	0	1	0	1	0	8	8	10	242	1.88	1	0	0	1	10	0	0	0	0	0	13.9	405	3.52	132	38.4	0	0	0
QZ590711	1.88	1	231	1	0	0	0	0	2	1	1	7	8	15	246	1.8	1	0	0	1	8	0	0	0	0	0	12.8	463	4.5	153	43.3	0	0	0
QZ590787	1.58	1	238	1	0	0	0	1	0	1	0	10	10	7	245	1.6	0	0	1	6	23	0	0	0	0	0	7	196	4.37	174	49.9	0	0	0
QZ590810	0.86	0	206	1	1	0	0	0	0	1	0	8	9	5	211	0.84	0	0	1	1	10	0	0	0	0	0	5.5	109	5.58	176	57.3	0	0	0
QZ591102	3.05	1	256	1	0	0	0	0	0	0	0	10	10	10	266	3.15	1	0	0	10	3	0	0	0	0	0	11.7	342	4.42	155	43	0	0	0
QZ591321	2.15	0	247	1	0	0	0	1	0	0	0	9	10	6	253	2.17	1	0	0	6	5	0	0	0	0	0	11.2	210	4.82	179	50.4	0	0	0
QZ591871	3.1	0	274	3	0	0	0	0	0	0	0	10	10	2	276	3.08	3	1	0	2	4	0	0	0	0	0	18.3	255	4.71	168	47	0	0	0
QZ592149	2.425	0	267	0	0	0	0	0	0	0	0	10	10	7	274	2.32	0	0	0	6	5	0	0	0	0	0	11.7	204	4.63	173	49.2	0	0	0
QZ592168	2.85	1	279	0	0	0	0	0	0	0	0	7	8	4	283	2.9	1	0	0	3	19	0	0	0	0	0	6	286	4.17	147	41.7	0	0	0
QZ592242	1.23	0	225	1	1	0	0	0	0	0	2	8	9	43	268	2.14	1	0	1	3	16	0	0	0	0	0	9.88	244	3.85	124	37.7	1	0	0
QZ592301	1.65	0	239	0	0	0	0	1	0	1	0	10	10	15	254	1.81	1	0	0	1	14	0	0	0	0	0	9.6	592	3.46	119	34.7	0	0	0
QZ592373	2.5	1	256	1	0	0	0	0	0	0	0	10	10	8	264	2.5	1	0	0	8	7	0	0	0	0	0	11.4	279	4.64	157	45.9	0	0	0
QZ592564	2.7	1	256	1	0	0	0	0	0	1	0	9	10	5	261	2.64	0	0	0	4	6	1	0	0	0	0	8.9	216	4.59	159	44.6	0	0	0
QZ592778	3.2	1	268	0	0	0	0	0	0	0	0	10	10	3	271	3.08	1	0	0	2	6	0	0	0	0	0	9.8	276	4.65	165	45.8	0	0	0
QZ592894	2.75	1	253	0	0	0	0	1	0	0	0	10	10	19	272	3.33	1	0	0	18	5	0	0	0	0	0	13.2	448	3.2	112	32.8	0	0	0
QZ593226	2.4	0	245	1	0	0	0	0	0	1	0	8	9	5	250	2.37	0	1	0	5	8	0	0	0	0	0	9.5	173	4.28	149	42.5	0	0	0
QZ593228	2.95	1	274	0	0	0	0	0	0	0	0	10	10	4	278	2.76	0	0	0	3	11	0	0	0	0	0	9	364	4.39	157	43.4	0	0	0
QZ593234	2.7	0	258	0	0	0	0	1	0	0	0	10	10	5	263	2.71	1	1	0	5	7	0	0	0	0	0	12.5	220	4.24	115	46.1	0	0	0
QZ593308	2.25	1	238	0	0	0	0	1	0	1	0	9	10	19	257	2.41	1	0	0	21	7	0	0	0	0	0	8.9	224	3.13	109	31.5	0	0	0
QZ593547	2.15	1	259	1	0	0	0	0	0	0	0	10	10	14	273	2.44	0	0	0	3	7	0	0	0	0	0	7	331	3.8	133	38.2	0	0	0
QZ593708	2.75	1	273	1	0	0	0	0	0	0	0	9	10	3	276	2.94	1	0	0	2	26	0	0	0	0	0	8.4	295	4.82	173	49.4	0	0	1
QZ594232	2.85	1	251	1	0	0	0	1	0	0	0	10	10	20	271	3.29	1	0	0	21	6	0	0	0	0	0	7.1	313	4.44	149	45.4	0	0	0
QZ595155	1.7	0	248	1	0	0	0	1	0	0	0	9	10	14	262	1.92	1	0	0	13	5	0	0	0	0	0	9.4	497	4.53	154	44.5	0	0	0
QZ595280	3.5	1	267	1	1	0	0	0	0	0	0	10	10	2	269	3.47	1	0	0	2	4	0	0	0	0	0	13	216	4.66	171	49.1	0	0	0
QZ595542	2.73	1	257	0	0	0	0	0	0	0	0	10	10	3	260	2.81	1	0	0	3	7	0	0	0	0	0	7.7	219	5.12	180	49.2	0	0	0
QZ595552	2.8	1	253	0	0	0	0	0	0	1	0	10	10	3	256	2.84	0	0	1	2	14	0	0	0	0	0	4.6	253	4.29	158	44.8	0	0	0
QZ596059	1.65	1	247	1	1	0	0	0	1	0	2	3	6	19	266	1.92	1	0	0	3	9	0	0	0	0	0	8.9	352	3.75	137	38.6	0	0	0
QZ596492	2.75	1	272	1	0	0	0	0	0	0	0	9	10	26	298	3.36	1	0	0	26	8	0	0	0	0	0	13.11	396	4.71	148	45.9	0	0	0
QZ596618	2.1	0	259	1	0	0	0	0	0	1	0	10	10	10	269	2.2	1	0	0	10	3	0	0	0	0	0	10.4	409	4.64	165	46	0	0	0
SH20223998	1.45	0	218	1	0	0	0	1	0	1	0	10	10	31	249	1.95	1	0	0	1	59	1	1	0	1	1	1.75	191	3.44	118	32.5	0	0	0
SH20224452	1.54	1	222	0	0	0	0	1	0	0	1	10	10	24	246	2.04	0	0	0	2	16	1	0	0	0	0	9.54	275	3.45	114	32.1	0	0	0
SH20225283	1.39	1	217	0	0	0	0	1	0	1	0	8	9	15	232	1.5	1	0	1	15	11	0	0	0	0	0	14.81	182	4.77	160	42.5	0	0	0
SH20227586	1.345	1	209	1	0	0	0	0	0	0	3	7	3	26	235	1.85	0	1	1	2	25	1	0	0	0	0	10.56	382	3.03	101	27.9	0	0	0
SH20230951	1.72	1	214	0	0	0	0	0	0	1	0	9	10	53	267	2.17	1	1	0	1	32	1	0	0	0	0	5.61	230	3.25	103	28.4	0	0	1
SH20232912	1.465	0	246	1	1	0	0	0	0	0	0	8	8	6	252	1.44	0	0	0	7	7	0	0	0	0	0	12.78	161	5.1	192	53.4	0	0	0
SH20234568	0.81	1	197	1	1	0	0	0	0	0	1	8	10	95	292	2.13	1	1	1	1	67	1	0	0	1	3	26.39	331	4.67	135	39.4	1	0	0
SH20234653	2.36	0	241	1	0	0	0	0	0	0	1	8	10	4	245	2.27	0	0	0	5	10	0	0	0	0	0	11.21	269	5.16	185	48.4	0	0	0
SH20235209	1.465	1	218	0	0	0	0	1	0	1	0	9	9	21	239	1.96	1	0	0	1	31	1	0	0	0	0	12.27	254	3.84	126	34.6	0	0	0
SH20235354	1.81	1	260	1	0	0	0	0	0	0	0	9	9	7	267	1.87	1	0	0	8	18	1	0	0	0	0	12.57	122	4.9	166	46.2	0	0	0
SH20239820	0.79	1	206	1	1	0	0	0	0	0	0	9	9	29	235	1.15	0	0	1	1	40	1	0	0	0	0	8.6	78	3.19	105	29.4	1	0	0
SH20241211	1.29	1	201	0	0	0	0	0	0	0	1	5	9	31	232	1.75	1	0	1	1	26	1	0	0	1	1	8.41	344	4.41	143	40.4	1	0	0
SH20241842	1.39	1	203	1	0	0	0	0	0	0	0	10	10	29	232	1.78	1	0	0	1	22	1	0	0	0	0	6.7	274	3.97	128	35	1	0	0
SH20243408	1.75	0	218	0	0	0	0	0	0	1	0	9	10	11	229	1.8	1	0	0	1	21	0	0	0	0	0	15.35	421	5.23	182	48.4	0	0	0
SH20245272	1.29	0	225	1	0	0	0	1	0	1	1	7	9	19	244	1.45	1	1	0	1	23	1	0	0	0	0	4.29	320	3.65	134	35.5	0	0	0
SH20246873	1.855	0	245	1	1	0	0	0	0	0	0	9	9	6	251	1.71	0	0	0	8	17	1	0	0	0	0	7.37	213	2.98	96	27.8	1	0	0
SH20248142	1.335	1	213	1	0	0	0	0	0	1	1	6	9	20	233	1.52	0	0	1	1	57	1	0	0	0	0	8.34	731	2.52	94	26	0	0	0
SH20249094	0.77	1	189	1	0	0	0	1	1	1	2	6	8	11	200	0.75	0	0	1	1	19	1	1	1	0	0	20.88	14	3.04	122	31.7	0	0	0
SH20254942	1.875	0	239	1	0	0	1	0	0	1	1	9	9	7	246	1.81	0	0	0	7	19	0	0	0	0	0	14.77	329	4.79	175	48.5	0	0	0
SH20254943	2.22	1	239	1	0	0	1	0	0	1	1	9	9	12	251	2.07	1	0	0	12	15	0	0	0	0	0	16.06	549	5.88	201	52.2	0	0	0
SH20256895	1.78	1	228	1	0	0	0	0	2	1	1	8	9	7	235	1.87	0	1	0	1	23	1	1	0	0	0	10.42	28	2.94	103	28	0	0	0
SH20257311	2.95	1	273	1	0	0	0	0	0	0	0	10	10	5	278	2.83	0	0	0	5	14	0	0	0	0	0	12.64	277	6.07	212	57.8	0	0	0
SH20257419	0.85	1	181	0	0	0	0	0	0	0	2	4	7	64	245	1.79	1	1	1	1	72	1	0	0	1	2	9.32	927	3.59	106	30.3	0	0	0
SH20259064	1.41	1	215	0	0	0	0	1	0	0	0	10	10	28	243	1.74	1	1	0	1	18	1	0	0	0	0	14.04	369	3.49	124	35.5	0	0	1
SH20259400	2.795	0	251	1	1	0	0	0	0	0	1	9	10	6	257	2.6	0	1	0	6	15	1	0	0	0	0	6.27	198	4.4	153	43	0	0	0
SH20260470	2.41	1	250	1	0	0	1	0	0	0	0	10	10	5	255	2.28	1	1	0	5	2	1	1	0	0	0	2.17	229	4.93	177	50.3	0	0	0
SH20260674	2.31	1	255	1	0	0	0	0	0	0	0	9	9	6	261	2.35	1	1	0	6	17	1	0	0	0	0	13.62	450	3.18	107	29.9	0	0	0
SH20261560	1.875	1	244	1	0	0	0	1	0	0	1	9	10	4	248	1.78	0	0	1	4	22	1	1	0	0	0	3.24	16	4.38	161	44	0	0	0
SH20261991	2.85	1	255	1	0	0	0	1	0	0	0	9	10	7	262	2.64	1	0	0	7	18	0	0	0	0	0	9.38	331	4.21	151	41	0	0	1
SH20262386	1.15	1	193	1	0	0	0	1	1	1	1	8	8	13	206	1.16	1	1	1	1	37	1	0	0	0	0	5.53	164	3.06	99	26.8	0	0	1
SH20262394	2.56	0	258	1	0	0	0	0	0	0	0	9	10	8	266	2.48	1	0	0	9	15	0	0	0	0	0	11.74	315	4.23	152	41	0	0	0
SH20262986	2.37	0	260	1	0	0	0	0	0	0	0	9	10	6	266	2.22	1	0	0	6	16	0	0	0	0	0	13.92	505	3.83	139	37.7	0	0	0
SH20264932	1.07	0	198	1	0	0	0	0	2	0	1	8	8	31	229	1.43	1	1	1	3	37	1	1	0	1	1	8.28	375	2.17	78	21.3	0	0	0
SH20265355	1.205	0	199	1	0	0	0	0	0	1	1	8	8	19	218	1.45	0	1	1	1	36	1	1	0	1	1	5.78	363	3.6	128	35.3	1	0	0
SH20267876	1.375	0	212	0	0	0	0	0	0	0	1	8	10	24	236	1.8	0	1	1	1	24	1	0	0	0	0	3.59	185	2.79	100	26.8	1	0	0
SH20269708	1.675	0	219	0	0	0	0	0	0	0	0	9	9	29	248	1.98	1	1	0	1	30	1	0	0	0	0	14.25	321	3.03	102	28.2	0	0	0
SH20269715	1.18	0	195	0	0	0	0	0	0	0	3	7	9	10	205	1.06	0	1	1	1	55	1	0	0	1	2	11.39	220	3.26	113	30.1	0	0	0
SH20269839	1.32	1	206	1	0	0	0	0	0	1	1	9	9	28	234	1.61	0	0	0	1	35	1	1	0	0	0	15.68	425	3.1	109	29.1	0	0	0
SH20270501	1.51	1	240	1	0	0	0	0	0	1	0	8	9	16	256	1.62	0	0	0	3	60	1	0	0	0	0	5.69	183	3.38	120	34.4	0	0	0
SH20270538	1.22	0	212	1	1	0	0	0	0	1	1	7	8	32	244	1.63	0	0	0	1	30	0	0	0	0	0	12.01	327	3.19	110	30.2	0	0	0
SH20270594	2.3	1	234	1	0	0	0	1	0	0	0	5	9	7	241	2.36	1	0	0	1	22	0	0	0	0	0	22.35	383	3.78	138	36.9	0	0	0
SH20270625	1.48	0	205	1	0	0	0	0	1	0	2	1	6	28	233	1.82	0	0	1	1	39	1	1	0	1	2	7.27	354	3.92	125	34.3	1	0	0
SH20270653	2.4	1	243	1	0	0	0	0	1	0	3	4	8	5	248	2.35	0	0	0	1	16	0	0	0	0	0	9.12	207	5.62	190	52.4	0	0	0
SH20271180	0.78	1	184	1	1	0	0	0	0	0	2	5	7	25	209	1.04	0	1	1	1	108	1	1	0	1	3	6.85	160	4.08	120	33.9	1	0	0
SH20271221	1.32	1	225	1	0	0	0	1	0	0	2	8	9	10	235	1.6	0	0	1	1	18	0	0	0	0	0	19.95	230	4.44	164	44.8	0	0	0
SH20272700	2.21	0	236	1	0	0	0	0	0	1	0	8	9	6	242	2.14	0	0	1	7	17	1	0	0	0	0	6.2	259	3.2	116	34.4	0	0	0
SH20274358	1.71	1	222	0	0	0	0	0	0	0	1	7	8	26	248	2.01	1	1	0	1	53	0	0	0	0	0	11.03	524	3.72	127	33.5	0	0	0
SH20274670	0.925	1	199	1	1	0	0	0	0	0	2	5	8	41	240	1.5	1	0	0	1	23	1	0	0	1	2	12.46	700	2.59	89	24.6	0	0	0
SH20275193	1.98	0	255	1	1	0	0	0	0	0	0	9	10	5	260	1.95	1	0	0	4	33	1	0	1	0	0	14.81	278	4.14	146	40.2	0	0	1
SH20275806	1.89	1	227	1	0	0	0	1	1	0	0	9	10	22	249	2.05	0	0	0	1	31	0	0	0	0	0	13.91	341	4.25	152	42.8	0	0	0
SH20278135	1.66	1	212	1	0	0	0	0	0	0	1	7	8	14	226	1.73	0	1	0	1	28	1	0	0	0	0	19.2	395	4.1	153	41.9	0	0	0
SH20279944	0.985	0	192	0	0	0	0	0	0	0	2	6	8	54	246	1.86	0	1	1	1	101	1	1	0	1	2	2.91	215	5.43	155	42.9	1	0	1
SH20281579	2.015	0	227	1	0	0	0	0	0	1	0	8	9	13	240	2	1	0	0	13	17	0	0	0	0	0	12.63	634	3.48	119	33	0	0	0
SH20282077	1.92	0	233	1	0	0	0	1	0	0	1	8	10	10	243	1.88	1	0	0	1	14	1	0	0	0	0	18.57	384	5.5	208	58.2	0	0	0
SH20282210	1.12	1	213	1	1	0	0	0	0	0	1	8	9	23	236	1.43	0	0	0	1	48	1	0	0	0	0	8.88	187	2.71	105	27.9	0	0	0
SH20283004	1.41	1	226	1	1	0	0	0	0	0	1	9	9	32	258	1.9	0	0	0	2	29	1	0	0	0	0	9.13	360	3.24	111	30.8	0	0	0
SH20283426	1.13	0	195	0	0	0	0	1	0	1	2	6	8	35	230	1.62	1	0	1	1	26	1	0	0	1	2	7.69	339	4.8	141	41.6	0	0	0
SH20283429	1.69	1	225	1	0	0	0	1	0	1	1	8	9	19	244	1.91	0	0	0	1	27	1	0	0	0	0	7.04	134	5.28	182	50.5	0	0	0
SH20283840	1.21	1	206	1	0	0	0	0	0	0	2	8	8	24	230	1.4	0	1	1	1	37	1	0	0	1	2	6.23	318	3.84	129	35.2	0	0	0
SH20289350	2.255	1	239	1	0	0	0	0	0	0	1	8	9	10	249	2.2	0	1	0	10	17	1	0	0	0	0	14.55	215	4.14	141	39	0	0	0
SH20289831	1.56	1	214	1	1	0	0	0	0	1	1	8	9	32	246	2.27	1	0	0	4	50	1	0	0	0	0	7.39	419	3.62	118	36.4	0	0	0
SH20290027	1.8	0	235	1	0	0	0	0	0	0	1	6	9	7	242	1.8	0	1	1	6	21	0	0	0	0	0	4.22	226	5.07	194	56.5	0	0	1
SH20290310	1.795	1	215	1	0	0	0	1	0	0	2	9	9	20	235	1.85	1	0	0	1	20	0	0	0	0	0	11.4	562	3.66	122	35.7	0	0	0
SH20290650	2.62	1	259	0	0	0	0	0	0	0	0	9	9	32	291	3.05	1	0	1	5	25	1	0	0	0	0	8.63	187	3.92	120	34.4	1	0	0
SH20290755	1.67	1	230	1	1	0	0	0	0	0	0	9	10	7	237	1.63	0	1	0	9	14	0	0	0	0	0	9.49	200	4.57	174	52	0	0	0
SH20291354	1.49	0	223	0	1	0	0	0	0	0	2	9	9	26	249	1.75	1	1	0	1	18	0	0	0	0	0	15.32	408	4.56	158	47.4	0	0	0
SH20291421	0.865	0	220	1	1	0	0	0	0	0	2	9	9	31	251	1.22	0	1	0	1	37	1	0	0	0	0	2.31	321	2.71	80	24.9	0	0	1
SH20292467	1.25	1	207	0	0	0	0	0	0	0	2	8	8	23	230	1.68	1	1	1	1	44	1	0	0	0	0	8.85	444	3.23	108	29.2	0	0	1
SH20294146	2.25	1	241	0	0	0	0	1	0	0	0	9	9	8	249	2.3	1	0	0	1	31	1	0	0	0	0	11.31	340	3.99	138	37	0	0	1
SH20296245	1.8	1	231	0	0	0	0	0	0	0	0	8	9	11	242	1.73	0	1	0	12	15	1	0	0	0	0	14.58	422	4.82	167	48.7	0	0	0
SH20297009	1.09	0	195	0	0	0	0	0	0	1	2	6	8	68	263	2.43	1	1	0	1	77	1	1	0	1	2	12.47	381	4.33	126	38.6	1	0	0
SH20297084	2.48	1	252	1	0	0	0	1	0	0	0	9	9	24	276	2.66	0	0	0	8	26	0	0	0	0	0	7.66	319	2.49	91	28.8	0	0	0
SH20297459	2.38	0	244	1	1	0	0	0	0	0	0	10	10	8	252	2.34	0	0	0	5	12	0	0	0	0	0	13.1	262	4.81	175	53.1	0	0	0
SH20298647	1.525	1	212	1	0	0	0	0	1	0	2	8	8	12	224	1.56	0	1	1	1	12	1	1	1	0	0	15.16	533	3.9	156	43.4	0	1	1
SH20299173	1.14	1	191	0	0	0	0	0	0	0	1	8	8	24	215	1.3	1	0	1	23	79	1	1	0	0	0	15.47	524	2.44	85	25.5	0	0	1
SH20299669	1.63	0	223	1	0	0	0	0	0	1	2	7	8	33	256	2.16	0	1	0	1	25	0	0	0	0	0	13.32	301	3.53	125	36.7	1	0	0
SH20301311	1.01	0	209	1	1	0	0	0	0	1	1	7	9	44	253	1.8	1	0	1	1	35	1	1	0	0	0	2.14	257	3.4	112	34.7	0	0	0
SH20303239	1.735	0	218	1	1	0	0	0	1	0	3	3	5	30	248	1.99	0	0	1	30	21	1	0	0	1	1	6.15	353	3.47	116	35.6	0	0	0
SH20304041	1.27	1	208	1	0	0	0	0	0	0	2	7	8	29	237	1.51	0	0	1	6	42	1	0	0	0	0	4.17	278	2.77	91	27.4	0	0	1
SH20304116	1.52	1	209	1	0	0	0	0	2	1	0	8	8	41	250	2.29	1	1	0	2	34	1	0	0	1	2	17.9	399	4.99	137	41.7	0	0	0
SH20304325	1.16	0	211	1	1	0	0	1	0	1	1	9	9	13	224	1.23	1	1	1	1	21	1	0	0	0	0	15.64	341	4.62	171	49.2	0	0	0
SH20305040	3.37	0	268	1	0	0	0	0	0	0	0	9	10	3	271	3.2	1	0	0	6	1	0	0	0	0	0	37.13	354	3.21	118	34.5	0	0	0
SH20305973	3.22	0	266	1	1	0	0	0	0	0	0	9	10	8	274	2.89	1	0	0	8	14	1	0	0	0	0	31.56	399	4.29	156	44.5	0	0	0
SH20307506	1.7	0	238	1	0	0	0	0	0	0	0	10	10	12	250	1.86	0	0	0	13	11	1	0	0	0	0	12.39	334	3.32	125	37.4	0	0	0
SH20311371	1.02	1	212	1	1	0	0	0	0	0	2	2	5	41	253	1.72	1	1	1	2	19	1	0	0	0	0	7.23	310	3.29	122	36.9	0	0	0
SH20315303	3.3	0	270	0	0	0	0	0	0	0	0	10	10	9	279	3.2	1	1	0	10	14	0	0	0	0	0	19.79	565	3.66	136	45.2	0	0	0
SH20318424	1.53	1	237	1	1	0	0	0	0	0	0	10	10	4	241	1.39	0	1	1	2	11	1	0	0	0	0	7.44	165	4.37	173	50.8	0	0	0
SH20319518	2.33	1	228	0	0	0	0	0	0	1	0	9	9	16	244	2.09	1	1	0	2	13	0	0	0	0	0	11.4	562	4.36	151	43.6	0	0	0
SH20320507	0.97	0	211	1	1	0	0	0	0	1	0	7	7	47	258	1.81	1	1	1	1	38	1	0	0	1	2	10.98	555	3.81	120	37.3	0	0	0
SH20321054	3.78	1	269	1	0	0	0	0	0	0	0	10	10	10	279	3.7	1	0	0	11	8	0	0	0	0	0	13.05	265	4.65	176	54.1	0	0	0
SH20322069	1.458	1	212	1	1	0	0	0	1	1	1	8	9	12	224	1.41	1	1	1	12	22	1	0	0	0	0	30.75	578	4.79	155	46.3	0	0	1
SH20328246	1.88	1	242	1	1	0	0	0	0	0	0	9	10	7	249	1.88	1	0	0	8	27	0	0	0	0	0	11.7	333	4.43	157	49.1	0	0	1
SH20331723	2.355	0	255	1	0	0	0	0	0	0	1	1	9	5	260	2.23	1	1	0	5	16	1	0	0	0	0	15.88	257	3.88	138	39.5	0	0	1
SH20339561	2.65	1	261	1	0	0	0	0	0	0	0	9	10	6	267	2.65	1	1	0	6	18	0	0	0	0	0	7.46	233	3.01	107	32.6	0	0	0
SH20339850	3.4	1	260	1	0	0	0	0	0	0	0	10	10	3	263	3.31	0	0	1	2	17	0	0	0	0	0	17.97	222	6.26	220	62.6	0	0	0
SH20345194	1.9	0	241	0	0	0	0	1	0	1	0	9	9	15	256	1.92	1	1	0	15	16	0	0	0	0	0	13.41	498	3.7	145	42.9	0	0	0
SH20346729	1.745	0	231	1	0	0	0	0	1	0	2	8	8	3	234	1.7	0	1	1	3	11	0	0	0	0	0	4.26	108	3.91	146	44.4	0	0	1
SH20348676	2.05	1	238	1	0	0	0	1	0	0	0	9	10	11	249	2.25	1	0	1	13	15	1	1	0	0	0	5.46	414	3.08	112	30.8	0	0	1
SH20349331	0.68	1	197	1	1	0	0	0	0	1	2	6	8	41	238	1.24	0	1	1	1	57	1	0	0	1	2	16.83	349	4.27	132	39.1	0	0	0
SH20350003	2.845	0	248	0	0	0	0	1	0	0	0	9	10	4	252	2.45	1	0	0	8	24	1	0	0	0	0	52.16	309	3.77	139	39.2	0	0	0
SH20359708	2.35	0	259	1	1	0	0	0	0	1	0	8	9	3	262	2.22	1	0	0	4	5	0	0	0	0	0	5.77	171	5.07	194	57.3	0	0	0
SH20360786	1.86	1	246	1	1	0	0	0	0	1	0	10	10	9	255	1.83	1	0	1	9	23	1	0	0	0	0	18.78	172	5.59	209	60.4	0	0	0

## Sheet: NEC_Treatment
Sample_ID	Weight	Gender	Gestational Age	Delivery Method	Gestational Hypertension	Chorioamnionitis	Intrahepatic Cholestasis of Pregnancy	Premature Rupture of Membranes	Placental Condition	Antenatal Steroid Use	Resuscitation Needed	1-min Apgar Score	5-min Apgar Score	Age of Illness Onset	Corrected Gestational Age	Weight at NEC Onset	Full Enteral Feeding at Onset	hsPDA After Birth	Respiratory Support During Illness	Age at antibiotic use	Duration of antibiotic use	Sepsis	Shock	Gastrointestinal Perforation	BPD	BPD Severity	WBC Count at NEC Onset	Platelet Count at NEC Onset	RBC Count at NEC Onset	Hemoglobin Level at NEC Onset	Hematocrit at NEC Onset	Blood Transfusions in 1 Week Before NEC	Acute Kidney Injury During NEC	NEC Stage	Treatment
JX1431433	3.55	0	274	0	0	0	0	0	0	0	0	9	10	2	276	3.16	1	0	0	2	14	1	0	1	0	0	7.27	298	4.6	167	49	0	0	IIIB	1
JX1448519	0.94	0	192	0	0	1	0	0	0	1	1	7	7	0	192	0.88	0	0	1	4	63	0	0	0	1	2	10.35	116	3.98	158	46.8	0	0	IIIB	1
JX1449103	1.04	0	226	1	0	1	0	0	0	1	0	9	10	2	228	0.99	0	0	1	1	24	0	0	0	1	1	3.85	150	4.11	165	47.7	0	0	IIB	1
JX1454013	1.5	0	220	1	0	0	0	0	0	0	0	7	9	16	236	1.65	1	0	0	14	17	0	0	1	0	0	5.25	244	3.09	103	33	0	0	IB	0
JX1457343	3.1	0	283	0	0	0	0	0	0	0	0	10	10	8	291	3.26	1	0	0	8	6	0	0	1	0	0	12.41	318	4.62	159	44.7	0	0	IB	0
JX1459819	2.1	1	254	0	0	0	0	0	0	0	0	9	10	1	255	2.12	0	0	0	2	4	0	0	1	0	0	12.81	252	5.15	188	53.1	0	0	IIA	0
JX1460454	2	1	217	1	1	1	0	0	0	1	0	8	10	26	243	2.05	0	0	1	1	12	0	0	1	1	2	21.27	608	5.35	171	52.2	1	0	IIA	0
JX1461808	1.75	1	231	1	0	1	0	0	0	1	0	9	10	4	235	1.59	0	0	1	5	13	0	0	1	0	0	9.19	311	3.93	150	44.7	0	0	IIA	0
JX1465107	2.75	0	260	1	0	0	0	0	0	0	0	9	10	4	264	2.75	0	1	1	1	10	0	0	1	0	0	17.18	294	5.14	181	54.6	0	0	IIIB	1
JX1467005	3.9	1	280	0	0	0	0	0	0	0	0	9	10	3	283	3.71	1	0	0	1	18	0	0	0	0	0	13.49	200	4.04	142	40.04	0	0	IIIA	1
JX1468057	1.45	1	206	1	0	1	0	0	2	1	2	5	9	2	208	1.52	0	0	1	2	14	0	0	0	1	2	7.21	139	3.79	138	40.4	0	0	IIB	0
JX1470592	1.18	1	198	0	1	0	0	0	0	1	2	5	8	10	208	1.37	2	0	1	15	35	1	0	0	0	0	10.31	185	2.35	81	25	0	0	IIA	0
JX1470658	1.14	1	194	0	0	0	0	0	0	1	2	7	9	3	197	1.1	2	0	1	1	33	1	0	1	1	3	13.2	137	4.57	172	52.7	0	0	IIIB	1
JX1471676	3	1	285	0	0	1	0	0	0	0	0	10	10	1	286	2.93	1	0	0	2	14	0	0	0	0	0	6.15	280	4.74	162	45.7	0	0	IIA	0
JX1475332	2.6	0	266	1	0	1	0	0	0	0	0	9	10	5	271	2.6	1	0	0	7	22	0	0	0	0	0	14.9	370	3.06	108	32.3	0	0	IIA	0
JX1475918	2.6	1	280	0	0	0	0	0	0	0	0	10	10	2	282	2.6	1	0	0	5	16	0	0	0	0	0	6.41	194	5.19	192	56.4	0	0	IIA	0
JX1475957	3	0	280	1	0	1	0	0	0	0	0	9	10	2	282	3.3	1	0	0	3	19	0	0	0	0	0	21.12	277	3.58	135	38.8	0	0	IIA	0
JX1478174	2.59	1	267	0	0	0	0	0	0	0	0	9	10	11	278	2.935	1	0	0	11	10	0	0	0	0	0	11.67	380	4.45	143	41.6	1	0	IIA	0
JX1478864	2.6	0	242	0	0	1	0	0	0	1	0	9	10	1	243	2.5	1	0	0	1	13	0	0	0	0	0	3.93	115	4.22	154	47.4	0	0	IIIA	1
JX1479698	2.3	1	253	1	0	1	0	0	0	1	0	8	9	2	255	2.3	2	0	0	1	16	0	0	0	0	0	8.9	125	3.23	123	34.6	0	0	IIA	0
JX1480569	2.9	1	266	0	0	0	0	0	0	0	0	9	10	1	267	2.74	2	0	0	1	4	0	0	0	0	0	10	254	4.4	157	45.1	0	0	IIB	0
JX1483248	2.1	0	250	1	0	0	0	0	0	1	0	9	10	14	264	2.38	1	0	0	21	23	0	0	0	0	0	17.1	558	3.69	136	39.4	0	0	IIA	0
JX1483287	3	1	260	1	1	0	0	0	0	0	0	9	10	4	264	2.845	1	0	1	6	33	1	1	1	0	0	4.13	192	5.37	167	50.5	0	1	IIIB	1
JX1483716	3.53	1	280	1	0	0	0	0	0	0	0	9	10	3	283	3.85	1	0	0	3	11	1	0	1	0	0	2.05	135	4.07	138	40.6	0	0	IIIB	1
JX1485546	2.5	1	249	0	1	1	0	0	0	1	0	8	10	1	250	2.38	1	0	0	2	13	0	0	0	0	0	10.08	174	4.29	161	43.1	0	0	IIA	0
JX1485875	3.55	1	280	1	0	0	0	0	0	0	0	9	10	13	293	3.87	1	0	0	15	12	1	0	0	0	0	10.95	591	5.12	169	49.6	0	0	IIA	0
JX1486507	3.55	1	277	0	1	0	0	0	0	0	0	9	10	1	278	3.17	2	0	0	1	15	0	0	0	0	0	5.99	275	4.11	143	41.4	0	0	IIA	1
JX1486534	2.2	0	259	0	0	0	0	0	0	0	0	9	10	1	260	2.2	2	0	0	2	13	0	0	0	0	0	14.34	313	4.55	159	47.6	0	0	IIA	0
JX1489224	2.45	0	259	0	1	0	0	0	0	0	0	9	10	1	260	2.44	1	0	0	3	9	0	0	0	0	0	12.74	337	5.03	183	51.8	0	0	IIA	0
JX1490459	3.2	0	277	1	0	0	0	0	0	0	0	9	10	14	291	3.46	1	0	0	21	18	0	0	0	0	0	11.9	500	3.63	123	34.8	0	0	IIA	0
JX1491344	1.86	0	237	1	0	0	0	0	0	1	0	10	10	17	254	2.04	1	0	0	20	8	0	0	0	0	0	11.89	380	3.29	118	32.7	0	0	IIA	0
JX1491908	3.5	1	280	0	0	1	0	0	0	0	0	9	10	2	282	3.29	1	0	0	3	16	0	0	0	0	0	7.23	215	3.3	115	32.9	0	0	IIB	0
JX1492322	2.75	0	250	1	0	0	0	0	0	1	0	8	9	5	255	2.4	1	0	0	6	6	0	0	0	0	0	12.47	297	5.41	187	56.3	0	0	IIA	0
JX1492547	2.8	1	258	0	0	1	0	0	0	0	0	5	7	1	259	2.56	0	0	1	1	15	1	1	0	0	0	13.2	238	4.27	146	43.9	0	0	IIA	0
JX1492759	2.8	1	259	0	0	1	0	0	0	0	0	9	10	1	260	2.73	1	0	0	3	5	0	0	0	0	0	6	179	4.92	165	49.2	0	0	IIA	0
JX1495459	1.5	1	218	0	1	1	0	0	0	1	1	8	9	20	238	1.73	2	0	1	1	7	0	0	0	0	0	4.47	269	3.75	125	35.8	0	0	IIIA	1
JX1497574	2.4	0	238	0	0	0	0	0	0	1	0	8	10	19	257	2.71	1	0	0	19	6	0	0	0	0	0	12.18	343	4.49	155	46.2	0	0	IIA	0
JX1498084	2.55	0	256	1	0	0	0	0	0	0	0	8	10	6	262	2.5	1	0	0	7	10	0	0	0	0	0	9.18	259	3.41	117	34.6	0	0	IIA	0
JX1498650	3.2	1	259	0	0	0	0	0	0	0	0	10	10	10	269	2.98	1	0	0	12	6	0	0	0	0	0	8.7	430	4.99	174	49.6	0	0	IIA	0
JX1498913	2.3	0	261	0	0	0	0	0	0	0	0	10	10	8	269	2.32	1	0	0	10	15	0	0	0	0	0	10.9	599	4.77	166	48.9	0	0	IIA	0
JX1501753	1.2	1	209	0	0	0	0	1	0	1	0	8	10	1	210	1.19	2	0	1	1	37	1	0	1	0	0	6.62	123	4.19	154	44.8	0	0	IIIB	1
JX1503183	2.6	1	259	0	0	1	0	0	0	0	0	9	10	9	268	2.52	1	0	0	10	7	0	0	0	0	0	6.18	316	4.25	160	46.6	0	0	IIA	0
JX1504214	1.325	0	211	0	0	1	0	0	1	1	0	9	9	22	233	1.35	1	1	1	1	20	1	0	1	1	1	22.12	499	3.5	121	36.8	0	0	IB	0
JX1505504	3.35	1	273	1	0	0	0	0	0	0	0	10	10	2	275	3.24	1	0	0	2	14	0	0	0	0	0	12.14	268	3.7	137	37.6	0	0	IIIA	1
JX1507061	2.75	1	277	1	0	0	0	0	0	0	0	10	10	8	285	2.81	1	0	0	9	12	0	0	0	0	0	9.2	375	4.53	158	48.9	0	0	IIA	0
JX1509852	3	1	272	1	0	0	0	0	0	0	0	9	10	4	276	3.5	1	0	0	4	23	0	0	0	0	0	13.73	230	3.52	124	34.3	0	0	IIA	1
JX1515310	3.65	1	281	0	0	0	0	0	0	0	0	10	10	1	282	3.52	1	0	0	1	13	0	0	0	0	0	16.38	239	4.79	167	48.7	0	0	IIA	0
JX1518133	2.5	1	254	1	0	0	0	0	0	0	0	8	10	4	258	2.355	0	0	0	8	22	0	0	0	0	0	20.49	438	3.46	126	35.6	0	0	IIA	0
JX1518983	2.475	1	259	1	0	0	0	0	0	0	0	9	10	3	262	2.36	1	0	1	3	8	0	0	0	0	0	5.97	118	4.58	156	52.2	0	0	IIA	0
JX1520887	3.6	1	271	0	0	0	0	0	0	0	0	9	10	14	285	3.52	1	0	0	15	12	0	0	0	0	0	15.17	702	3.74	126	36.2	0	0	IIA	0
JX1521104	3	1	259	0	0	1	0	0	0	0	0	10	10	9	268	3.19	1	0	0	10	7	0	0	0	0	0	15.82	433	4.58	159	46	0	0	IIA	0
JX1521115	3.1	0	278	0	0	0	0	0	0	0	0	10	10	2	280	2.88	0	0	0	1	3	0	0	1	0	0	6.69	93	4.34	133	36.2	0	0	IB	0
JX1521669	2.6	1	268	1	0	0	0	0	0	0	0	8	10	13	281	3.3	1	0	0	21	11	0	0	0	0	0	8.59	231	4.28	138	39.3	0	0	IIA	0
JX1523646	2.5	1	253	0	0	1	0	0	0	0	0	9	10	7	260	2.7	1	0	0	8	14	0	0	0	0	0	11.04	267	3.16	108	30.9	0	0	IIA	0
JX1524841	3.05	1	264	1	0	0	0	0	0	0	0	7	9	6	270	2.99	1	0	1	6	8	1	1	0	0	0	5.4	240	4.49	163	46.3	0	0	IIIA	1
JX1541212	2	0	234	1	0	0	0	0	0	1	1	6	8	1	235	2	0	0	1	1	15	0	0	0	0	0	16.01	312	4.68	151	44.8	0	0	IB	0
JX1542843	3.1	0	264	0	0	0	0	0	0	0	0	10	10	11	275	2.83	0	0	0	2	8	0	0	0	0	0	11.74	281	5.37	189	55.2	0	0	IIA	0
JX1543748	1.34	0	240	1	0	1	0	0	0	0	1	8	7	2	242	1.235	0	1	1	1	16	1	0	0	1	3	3.75	116	3.81	153	41.2	0	0	IIB	1
JX1544216	3.5	1	280	0	0	0	0	0	0	0	0	10	10	7	287	3.52	1	0	0	7	3	0	0	0	0	0	9.32	111	5.08	176	52.8	0	0	IIA	0
JX1546651	2	1	230	1	0	0	0	0	0	1	0	9	10	2	232	1.91	0	0	0	5	10	0	0	0	0	0	27.16	393	4.66	166	48.9	0	0	IIA	0
JX1547316	3.1	0	285	0	0	0	0	0	0	0	0	10	10	25	310	3.8	1	0	0	26	10	0	0	0	0	0	9.12	454	4.18	141	41.4	0	0	IIA	0
JX1549292	3	1	254	1	0	1	0	1	0	0	1	8	10	5	259	2.94	0	0	1	5	10	0	0	0	0	0	20.33	327	4.74	149	45.2	0	0	IIA	0
JX1549340	3.9	1	271	1	0	0	0	0	0	1	1	5	7	28	299	4.38	1	0	0	26	10	0	0	0	0	0	8.31	225	4.09	132	40.5	0	0	IA	0
JX1550392	2.75	0	266	1	0	0	0	0	0	0	0	10	10	18	284	2.82	1	0	0	18	8	0	0	0	0	0	14.35	597	4.17	140	40.6	0	0	IA	0
JX1555803	2.8	1	254	0	0	1	0	1	0	0	0	10	10	10	264	2.8	0	0	0	7	7	0	0	0	0	0	11.69	412	4.2	148	45.7	0	0	IIA	0
JX1556735	1.4	0	203	1	0	0	0	0	0	0	0	10	10	1	204	1.4	0	0	1	1	2	0	0	0	1	3	12.9	439	4.99	160	50.1	0	0	IIA	0
JX1557547	1.8	1	234	1	0	0	0	0	0	0	0	10	10	3	237	1.78	1	0	0	4	18	0	0	1	0	0	10.73	216	5.12	174	53.2	0	0	IIIB	1
JX1558836	2.15	0	230	0	0	0	0	0	0	1	0	10	10	5	235	2.3	0	0	1	6	4	0	0	0	1	1	17.87	252	4.48	162	45.7	1	0	IIA	0
JX1560271	1.6	0	209	1	0	1	0	0	0	1	0	10	10	9	218	1.68	0	0	1	1	17	0	0	0	1	3	26	423	3.71	123	37.9	0	0	IA	1
JX1561112	2.5	1	259	0	0	0	0	0	0	0	0	10	10	7	266	2.55	1	0	0	7	12	0	0	0	0	0	9.93	215	4.61	165	48.6	0	0	IIA	0
JX1566248	3.1	1	263	0	0	0	0	1	0	0	0	10	10	1	264	3.01	0	0	0	1	7	0	0	0	0	0	11.98	303	4.88	168	50.8	0	0	IA	0
JX1569620	3.3	0	272	1	1	0	0	0	0	0	0	10	10	3	275	3.28	0	0	0	4	8	0	0	0	0	0	8.9	310	4.51	150	45.6	0	0	IIA	0
JX1569810	3.25	1	268	1	0	0	0	0	0	0	0	10	10	3	271	3.14	0	0	0	3	11	0	0	0	0	0	8.6	314	4.79	179	50.2	0	0	IIA	0
JX1571923	2.5	1	262	1	0	0	0	0	0	0	1	5	9	3	265	2.56	0	0	0	3	18	0	0	0	0	0	18.37	370	2.96	98	29.6	1	0	IIA	0
JX1574345	3.45	1	274	0	0	0	0	0	0	0	0	10	10	20	294	4	1	0	0	20	7	0	0	0	0	0	4.25	442	3.35	105	31.3	0	0	IIA	0
JX1576803	4	1	271	0	0	0	0	0	0	0	0	10	10	5	276	4.4	0	0	0	17	4	0	0	0	0	0	12.85	342	4.09	138	39.8	0	0	IIA	0
JX1576963	4.4	1	280	0	0	0	0	0	0	0	0	10	10	7	287	4.73	0	0	0	17	9	0	0	0	0	0	7.85	502	4.22	136	41.3	0	0	IIA	0
JX1577350	2.9	1	273	0	0	0	0	0	0	0	0	10	10	1	274	2.72	0	0	0	2	6	0	0	0	0	0	9.5	277	6	188	57.2	0	0	IIA	0
JX1577370	3.8	1	278	0	0	0	0	0	0	0	0	10	10	2	280	3.84	1	0	0	7	5	1	0	0	0	0	4	209	5.36	183	52.5	0	0	IIB	1
JX1578521	0.85	1	188	1	0	1	0	0	0	0	1	0	5	5	193	0.89	0	1	1	6	16	0	0	1	1	1	7.14	24	4.46	147	44.3	0	0	IIB	0
JX1581741	1.13	1	189	0	0	0	0	0	0	1	1	6	8	6	195	1	0	0	1	1	35	1	1	1	1	3	60.22	216	3.58	113	33.5	0	0	IIIA	1
JX1582461	3.45	0	259	1	0	0	0	0	0	0	0	10	10	22	281	4.3	1	0	0	23	3	0	0	0	0	0	11.48	395	4.92	165	49.7	0	0	IIA	0
JX1584615	2.95	1	273	0	0	0	0	0	0	0	0	10	10	12	285	3.3	1	0	0	13	14	0	0	0	0	0	15.16	544	4.95	174	51.3	0	0	IIA	0
JX1585093	3.15	1	266	0	0	0	0	0	0	0	0	10	10	2	268	3.1	0	0	0	2	10	0	0	0	0	0	10.32	150	5.37	192	54.4	0	0	IIB	0
JX1585184	2.85	1	264	0	0	0	0	0	0	0	0	10	10	1	265	2.89	1	0	0	6	15	0	0	0	0	0	20.93	286	4.66	158	46.3	0	0	IIB	0
JX1585185	1.33	1	217	1	0	0	0	0	1	1	1	3	6	1	218	1.24	0	0	1	2	10	0	0	0	1	3	5.35	202	3.49	129	40	0	0	IIA	0
JX1587798	3.5	1	284	0	0	0	0	0	0	0	0	10	10	1	285	3.37	0	0	0	1	8	0	0	0	0	0	14.01	319	4.4	157	46.4	0	0	IIA	0
JX1588742	3.45	1	289	0	0	0	0	0	0	0	0	10	10	1	290	3.33	0	0	0	1	18	0	0	0	0	0	12.03	211	5.24	183	55	0	0	IIB	0
JX1592756	2.11	0	238	1	0	0	0	0	0	0	0	10	10	1	239	2	0	0	0	2	16	0	0	0	0	0	6.96	224	3.36	132	39.7	0	0	IIA	0
JX1593031	2.41	0	238	1	0	0	0	0	0	0	0	9	10	1	239	2.36	0	0	0	4	14	0	0	0	0	0	9.49	288	3.86	152	43.2	0	0	IIA	0
JX1593682	1.34	1	228	1	1	0	0	0	0	1	0	7	9	3	231	1.39	0	0	1	1	16	1	1	0	1	3	17.6	232	3.4	139	39.6	0	0	IIIA	1
JX1594367	2.5	0	264	0	0	0	0	0	0	0	0	10	10	9	273	2.38	1	0	0	11	8	0	0	0	0	0	9.61	446	4.57	161	45.8	0	0	IIA	0
JX1595405	1.833	0	219	0	0	0	0	0	0	0	0	10	10	1	220	1.8	1	0	1	4	22	0	0	0	1	3	11.82	181	3.44	118	33.8	0	0	IIA	0
JX1595704	3	1	246	1	0	0	0	0	0	0	0	10	10	1	247	2.9	0	0	0	6	10	0	0	0	0	0	10.91	322	3.73	137	39.6	0	0	IIA	0
NMG536863	1.48	0	206	0	0	0	0	0	0	0	2	7	9	3	209	1.46	0	0	1	1	53	0	0	0	0	0	8.71	147	3.33	131	39	0	0	IB	0
NMG537400	1.73	0	218	1	0	0	0	1	0	1	0	9	9	3	221	1.7	0	0	1	1	29	1	0	0	0	0	15.56	231	4.44	177	51	0	0	IIA	0
NMG538598	2.4	1	264	1	0	0	0	0	0	0	0	9	9	1	265	2.28	1	0	1	1	14	0	0	0	0	0	11.22	204	5.55	190	56	0	0	IB	0
NMG539348	1.66	1	217	0	0	0	0	1	0	1	0	9	9	1	218	1.66	0	0	1	1	41	0	0	0	1	1	10.86	295	4.68	173	49.4	0	0	IB	0
NMG539380	2.1	0	236	0	0	0	0	1	0	0	0	9	9	3	239	2.08	0	0	1	3	22	0	0	0	0	0	7.85	253	4.39	173	49.3	0	0	IIA	0
NMG539627	3.47	1	260	0	0	0	0	0	0	0	0	9	9	6	266	3.27	1	0	1	1	9	0	0	0	0	0	16.3	436	4.72	163	47.6	0	0	IIA	0
NMG540126	1.35	1	223	1	1	0	0	0	0	1	2	7	9	13	236	1.39	0	1	1	1	46	0	0	0	0	0	4.15	153	2.72	109	31.9	0	0	IIA	0
NMG540828	2.2	1	265	0	0	0	0	0	0	0	0	9	9	13	278	2.48	1	1	1	1	20	0	0	0	0	0	5.86	259	2.96	99	29.1	0	0	IIA	0
NMG541155	0.9	0	195	0	0	0	0	0	0	1	2	5	9	3	198	0.9	0	0	1	1	82	1	0	0	0	0	14.87	88	2.63	108	31	1	0	IB	0
NMG541270	2.64	0	242	1	0	0	0	0	1	0	2	4	8	2	244	2.62	0	1	1	1	35	0	0	0	0	0	6.29	125	4.48	172	48.7	0	0	IIA	0
NMG542048	1.28	0	200	0	1	0	0	0	0	0	0	9	9	11	211	1.2	0	1	1	1	21	0	0	0	0	0	22.03	269	3.34	115	35.7	0	0	IIA	0
NMG542861	1.15	1	213	1	1	0	0	0	0	0	0	9	9	13	226	1.14	0	1	1	1	31	1	0	0	0	0	20.32	63	3.17	133	37.9	0	0	IA	0
NMG545202	1.26	0	209	0	0	0	0	1	0	0	0	9	9	18	227	1.44	1	1	1	1	44	1	1	0	1	2	27.17	147	2.49	90	24.6	1	0	IIA	0
NMG546135	1.35	0	224	0	1	0	0	0	0	1	0	9	9	6	230	1.3	0	0	1	1	10	0	0	0	0	0	13.06	175	5.06	194	56.7	0	1	IIA	0
NMG546215	2.72	1	249	1	0	0	0	0	0	0	0	9	9	3	252	2.63	0	0	1	2	10	0	0	0	0	0	13.26	250	5.98	209	60.8	0	0	IIA	0
NMG546262	1.27	1	218	1	1	0	0	0	0	0	0	8	9	2	220	1.25	0	0	1	2	24	0	0	0	0	0	9.46	196	5.07	205	61.5	0	0	IB	0
NMG546262002	1.27	1	218	1	1	0	0	0	0	0	0	8	9	3	221	1.2	0	0	1	2	9	0	0	0	0	0	9.46	196	5.07	205	61.5	0	0	IA	0
NMG547101	1.66	0	242	1	1	0	0	0	0	1	0	9	9	5	247	1.65	0	0	1	5	4	1	0	0	0	0	10.22	307	1.04	146	43.2	0	0	IIA	0
NMG547729	2	1	222	1	1	0	0	0	0	1	0	8	9	5	227	1.92	0	1	1	2	24	0	0	0	0	0	6.31	211	4.12	164	48.1	0	0	IB	0
NMG550795	0.8	0	188	0	0	0	0	0	0	0	2	8	9	45	233	1.33	1	1	1	1	41	0	1	1	1	2	24.67	145	3.34	95	30.6	0	0	IIA	0
NMG551612	2.42	1	270	1	1	0	0	0	0	0	0	9	9	3	273	2.4	0	0	1	2	8	0	0	0	0	0	8.54	219	4.93	190	53.5	0	0	IIA	0
NMG551691	2.5	0	267	1	1	0	0	0	0	0	0	9	9	3	270	3.29	1	0	1	3	6	0	0	0	0	0	12.01	229	5.09	194	53.9	0	0	IA	0
NMG551746	1.03	0	197	0	0	0	0	1	0	1	0	9	9	17	214	1.14	0	0	1	1	50	0	0	0	1	1	16.38	272	3.52	142	42.1	0	0	IB	0
NMG551929	1.35	0	219	0	1	1	0	1	0	0	0	8	8	9	228	1.35	0	1	1	1	36	0	0	0	0	0	6.24	249	3.78	146	41	0	0	IIA	0
NMG552222	2.9	1	274	0	0	0	0	0	0	0	0	9	9	17	291	3.85	1	0	1	1	5	0	0	0	0	0	7.71	492	3.77	128	38.2	0	0	IA	0
NMG552794	0.98	1	188	0	0	0	0	0	0	0	0	8	9	44	232	1.36	1	0	1	1	31	0	0	0	1	2	9.21	183	3.81	114	33.8	1	0	IIA	0
NMG552955	0.9	1	196	1	1	0	0	0	0	0	2	8	9	19	215	1.13	0	0	1	2	30	1	1	0	0	0	3.74	215	2.45	89	25.9	0	0	IIB	0
NMG553156	2.16	0	241	1	0	0	0	0	2	0	1	9	5	11	252	2.07	1	0	1	3	31	0	0	0	0	0	20.81	46	4.28	143	41.7	0	0	IIA	0
NMG553505	0.97	1	198	1	1	0	0	0	0	0	0	9	9	30	228	1.17	0	1	1	1	48	0	0	0	0	0	7.78	324	2.78	99	29.8	0	0	IA	0
NMG553723	1.63	0	229	0	0	0	0	1	0	1	0	9	9	15	244	1.83	0	0	1	1	17	0	0	0	0	0	7.76	349	3.8	136	38.8	0	0	IIB	0
NMG553953	1.42	0	212	1	0	0	0	1	0	0	0	9	9	16	228	1.6	0	0	1	1	20	0	0	0	0	0	6.08	301	3.32	119	35	0	0	IB	0
NMG554058	0.98	0	195	1	0	0	0	1	0	0	2	7	8	15	210	1.13	0	0	1	1	15	1	1	0	0	0	7.39	145	3.36	140	41.8	0	0	IB	0
NMG554145	2.02	1	235	1	0	0	0	0	0	0	0	9	9	17	252	2.12	0	0	1	1	23	0	0	0	0	0	11.21	352	3.56	134	34.4	0	0	IA	0
NMG554147	2.14	1	268	1	0	0	0	0	0	0	0	9	9	8	276	2.17	1	0	1	2	14	0	0	0	0	0	4.53	123	3.86	146	43.3	0	0	IIA	0
NMG554176	2.22	1	266	0	0	0	0	0	0	0	0	9	9	25	291	2.4	1	1	1	1	14	0	0	1	0	0	5.69	110	3.52	112	33.3	0	0	IIIA	1
NMG554791	1.55	1	233	1	1	0	0	0	0	0	0	9	9	18	251	1.69	0	0	1	3	58	0	0	0	0	0	7.4	400	3.56	129	38.2	0	0	IIA	0
NMG554905	1.38	1	206	1	1	0	0	0	0	0	1	7	9	7	213	1.32	0	0	1	1	58	0	0	0	0	0	9.32	257	5.08	226	65.6	0	0	IIA	0
NMG555144	1.66	0	227	1	0	0	0	0	1	0	0	9	9	5	232	1.61	0	0	1	1	23	0	0	0	0	0	8.7	353	4.23	152	44.6	0	0	IA	0
NMG555497	1.1	1	210	0	0	0	0	0	0	0	0	9	9	50	260	1.93	1	0	1	1	37	0	0	0	1	2	6.49	410	3.56	107	33.2	1	0	IIA	0
NMG555607	1.28	0	227	1	1	0	0	0	0	0	0	9	9	13	240	1.38	0	0	1	5	31	0	0	0	0	0	5.66	182	4.75	183	53.2	0	0	IB	0
NMG556029	3.05	0	264	1	1	0	1	0	0	0	0	9	9	8	272	2.81	1	0	1	6	11	0	0	0	0	0	15.42	194	5.14	196	55.1	0	0	IIA	0
NMG556282	2.82	0	283	0	0	0	0	0	0	0	0	9	9	15	298	2.84	1	0	1	1	24	0	0	0	0	0	8.99	619	2.48	86	25.7	0	0	IIA	0
NMG556410	1.21	1	227	1	1	0	0	0	0	0	0	9	9	11	238	1.21	0	0	1	1	19	0	0	0	0	0	7.81	257	4.75	181	54.2	0	0	IB	0
NMG556626	1.24	0	203	0	0	0	0	0	0	0	0	9	9	21	224	1.43	0	1	1	1	49	0	0	0	0	0	5.12	202	2.91	102	29.1	0	0	IA	0
NMG556746	1.49	1	235	1	0	0	0	0	0	1	0	9	9	2	237	1.52	0	0	1	1	10	1	0	1	0	0	7.08	151	5.15	203	59.7	0	1	IIB	0
NMG556748	2.09	1	235	1	0	0	0	0	0	1	0	9	9	2	237	2.04	0	0	1	1	4	0	0	0	0	0	5.19	139	5.45	210	59.5	0	1	IA	0
NMG557489	1	1	201	0	0	0	0	0	0	0	0	9	9	20	221	1.16	0	0	1	1	50	0	0	0	0	0	7.06	180	4.92	162	48.7	1	0	IA	0
NMG557546	1.24	1	212	0	0	0	0	1	0	1	0	9	9	11	223	1.25	0	1	1	1	40	0	0	0	0	0	15.17	253	3.78	133	39.2	0	0	IB	0
NMG557705	1.63	0	247	0	0	0	0	1	0	1	0	9	9	2	249	2.4	0	0	1	3	5	0	0	0	0	0	12.41	285	4.93	172	50.6	0	0	IA	0
NMG557727	2.12	0	259	1	0	0	0	0	0	0	0	9	9	5	264	1.93	0	0	1	3	37	0	0	0	0	0	5.24	186	5.02	187	52.5	0	0	IA	0
NMG557880	3.35	1	282	0	0	0	0	0	0	0	1	6	9	6	288	3.28	1	0	1	6	9	0	0	0	0	0	6.52	260	4.11	149	43	0	0	IA	0
NMG559320	1.49	1	237	1	1	0	0	0	0	1	0	9	9	4	241	1.44	0	0	1	1	28	0	0	0	0	0	3.98	178	6.2	210	58.8	0	0	IIA	0
NMG560191	1.36	0	220	0	0	0	0	1	0	0	0	9	9	14	234	1.36	0	0	1	1	16	0	0	0	0	0	23.15	692	5.43	199	58.5	0	0	IB	0
NMG560660	0.97	1	214	1	1	0	0	0	0	0	0	9	9	40	254	1.42	0	1	1	4	43	0	0	0	0	0	3.49	148	3.11	104	31	1	0	IIA	0
NMG560743001	1.65	1	234	1	1	0	0	0	0	0	0	9	9	8	242	1.69	1	0	1	6	4	0	1	0	0	0	19.34	12	2.84	100	29.7	1	0	IIIA	1
NMG560911002	2.69	1	245	1	1	0	0	0	0	0	0	9	9	24	269	2.83	0	0	1	16	15	0	0	0	0	0	12.51	556	4.5	157	45.7	0	0	IIA	0
NMG561428002	1.83	1	219	1	0	0	0	1	2	0	0	9	9	36	255	2.4	1	0	1	30	13	0	0	0	0	0	9.47	371	2.82	96	31.1	0	0	IA	0
NMG562178	1.78	1	222	1	1	0	0	1	0	0	0	9	9	3	225	1.75	0	1	1	2	20	0	0	0	0	0	5.41	210	3.64	137	39.3	0	0	IB	0
NMG562425	3.14	1	283	0	0	1	0	0	0	0	0	9	9	5	288	3.02	1	0	1	4	9	0	1	0	0	0	13.98	380	3.85	140	39.5	0	0	IB	0
NMG562493	0.99	0	211	1	1	0	0	0	0	0	0	9	9	38	249	1.56	0	1	1	1	28	0	1	0	0	0	8.65	352	3.05	99	30.6	0	0	IA	0
NMG563309	1.39	0	238	1	1	0	0	0	0	0	0	9	9	4	242	1.39	0	1	1	1	7	0	0	0	0	0	4.92	124	7.59	271	79.5	0	0	IB	0
NMG563450	2.5	1	239	1	0	0	0	0	2	0	0	9	9	12	251	2.37	1	0	1	12	9	0	0	0	0	0	6.52	382	3.71	126	37.4	0	0	IB	0
NMG564664	1.61	0	232	1	0	0	0	1	0	0	0	9	9	8	240	1.62	0	1	1	1	17	0	0	0	0	0	11.18	252	4.53	163	48	0	0	IA	0
NMG564762	1.15	1	224	1	1	0	1	0	0	1	0	8	9	37	261	1.59	0	0	1	3	38	0	0	0	0	0	7.04	271	3.43	108	31.9	1	0	IIB	0
NMG564868	1.23	0	203	1	0	0	0	1	0	1	1	8	9	13	216	1.36	0	0	1	1	29	1	0	0	1	2	12.5	550	3.86	134	41	0	0	IIA	0
NMG565554	0.8	1	204	1	0	0	0	0	0	1	2	3	5	5	209	0.78	0	1	1	1	50	1	0	0	1	2	4.63	90	5.76	234	67.2	0	0	IA	0
NMG566622	1.2	0	201	1	0	0	0	1	0	0	0	9	9	12	213	1.2	0	0	1	1	56	1	0	0	0	0	15.46	214	3.32	124	37.6	0	0	IIB	1
NMG567095	1.25	1	203	1	1	1	0	0	1	1	2	9	9	10	213	1.31	0	1	1	4	11	1	1	0	0	0	6.2	324	4.19	144	42.4	0	0	IIA	0
NMG567118	2.09	1	236	1	0	0	0	1	0	0	0	9	9	9	245	2.05	0	0	1	1	10	0	0	0	0	0	7.09	279	4.81	166	49.1	0	0	IA	0
NMG568003	1.03	0	206	1	0	0	0	0	0	0	0	9	9	13	219	1.07	0	1	1	3	43	0	0	0	0	0	5.75	216	3.7	139	42.5	0	0	IB	0
NMG570882	1.11	1	194	0	0	0	0	0	0	0	0	8	9	45	239	1.6	0	1	1	1	42	1	0	0	1	1	9.84	366	3.3	93	28.1	0	0	IA	0
NMG571390	0.94	0	212	1	1	0	0	0	0	0	2	5	8	25	237	1.04	0	1	1	1	43	0	0	0	0	0	6.56	268	2.55	86	25.7	0	0	IB	0
NMG571457	1.3	1	214	1	1	0	0	0	0	0	1	9	9	2	216	1.27	0	1	1	1	35	1	1	0	0	0	6.19	140	4.83	173	50.4	0	0	IIB	0
NMG572117	1.49	1	223	1	1	0	1	0	0	0	0	9	9	18	241	1.55	0	0	1	1	35	0	0	0	0	0	15.61	287	4.69	171	50.3	0	0	IA	0
NMG572574	1.83	1	253	1	1	0	0	0	0	0	0	9	9	6	259	1.82	0	1	1	5	15	0	0	0	0	0	12.69	142	4.01	159	54	0	0	IIA	0
NMG572779	2	1	229	1	0	0	0	1	0	0	1	7	9	14	243	1.91	0	0	1	1	20	0	0	0	0	0	12.71	354	3.99	133	41.4	1	0	IB	0
NMG572856	2.45	1	251	1	0	0	1	0	0	0	0	9	9	5	256	2.41	0	0	1	3	3	0	0	0	0	0	6.92	235	4.54	167	48.4	0	0	IB	0
NMG574346	1.55	0	217	1	0	1	0	1	0	0	0	9	9	20	237	1.97	1	1	1	1	22	0	0	0	0	0	10.16	414	2.87	98	30.1	1	0	IIA	0
NMG575641	1.15	0	207	1	0	0	0	0	0	0	0	8	9	22	229	1.25	0	1	1	1	37	0	0	0	0	0	10.94	498	2.69	91	26.4	1	0	IB	0
NMG577198	1.33	1	222	1	0	0	0	1	0	0	0	9	9	13	235	1.36	0	0	1	2	14	0	0	0	0	0	12.84	401	3.54	129	38.2	0	0	IA	0
NMG577199	1.4	1	222	1	0	0	0	1	0	0	3	6	7	18	240	1.51	0	0	1	2	20	0	0	0	0	0	16.62	438	4.36	149	45.2	0	0	IA	0
NMG578388	1.48	0	238	1	1	0	0	0	0	0	0	9	9	4	242	1.3	0	0	1	3	11	0	0	0	0	0	6.48	180	5.48	201	61.4	0	0	IA	0
NMG578788	3.08	1	267	1	0	0	0	0	0	0	0	9	9	11	278	2.48	1	1	1	9	15	1	0	0	0	0	30.97	724	4.78	175	49.4	0	0	IIB	0
NMG579698	1.25	1	214	1	1	0	0	0	0	0	1	5	8	10	224	1.22	0	1	1	1	21	0	0	0	0	0	11.36	411	3.29	133	38.4	0	0	IIB	0
NMG580526	1.44	0	209	0	0	0	0	1	0	0	0	9	9	8	217	1.4	0	0	1	3	20	0	0	0	0	0	28.33	311	4.37	141	44.3	1	0	IB	1
NMG585054	1.76	1	229	0	0	0	0	0	0	0	0	8	9	8	237	1.74	0	1	1	2	19	0	0	0	0	0	7.63	442	4.71	168	48.4	0	0	IA	0
NMG585713	1	0	212	0	0	0	0	1	0	0	1	5	9	25	237	1.19	1	0	1	1	19	0	0	0	0	0	7.55	325	3.62	121	35.8	1	0	IB	0
NMG585784	3	1	247	1	0	0	0	0	0	0	0	9	9	11	258	3.18	1	0	1	11	10	0	0	0	0	0	12.62	466	3.55	132	38.2	0	0	IB	0
NMG585903	1.5	1	222	1	1	0	0	0	0	0	0	9	9	2	224	1.48	0	0	1	1	22	0	0	0	0	0	8.38	212	5.11	200	58.7	0	0	IA	0
NMG587354	1.4	1	215	1	0	0	0	1	0	1	0	9	9	28	243	1.65	1	0	1	1	16	0	0	0	0	0	12.23	351	4.17	146	42.5	0	0	IB	0
NMG587763	3.01	1	275	1	0	0	0	0	0	0	0	9	9	2	277	2.98	0	1	1	2	5	0	0	0	0	0	17.01	212	4.82	179	54.8	0	0	IB	0
NMG588291	1.2	1	227	1	1	0	0	0	1	0	1	7	9	27	254	1.55	1	1	1	2	24	1	0	0	0	0	7.22	177	2.81	95	29.2	0	0	IA	0
NMG588537	0.99	1	226	1	1	0	1	0	0	0	0	9	9	14	240	1.08	0	1	1	1	28	1	0	0	1	1	8.12	332	2.86	111	34.2	0	0	IA	0
NMG588663	1.24	1	225	1	1	1	0	0	0	0	2	9	9	3	228	1.22	0	1	1	1	53	0	0	0	0	0	9.27	126	5.12	212	61	0	0	IB	0
NMG588984	1.17	0	207	0	0	0	0	1	0	0	1	8	9	15	222	1.15	0	0	1	1	21	1	0	0	1	2	19.02	208	4.08	152	44.1	0	0	IIB	0
NMG589283	1.64	1	238	1	0	0	0	0	0	0	0	9	9	3	241	1.63	0	0	1	1	11	0	0	0	0	0	11.33	147	4.49	178	52.7	0	0	IA	0
NMG589690	1.1	0	208	1	0	0	0	0	0	0	2	5	8	20	228	1.33	0	1	1	1	18	0	0	0	0	0	10	144	3.13	113	34.1	0	0	IA	0
NMG590383	1.59	0	229	1	0	0	0	1	0	1	0	9	9	4	233	1.59	0	1	1	4	8	0	0	0	0	0	9.82	316	4.42	169	49.3	0	0	IIA	0
NMG590892	0.8	0	196	0	0	0	0	1	0	0	0	9	9	41	237	1.67	0	1	1	1	27	0	0	0	1	1	3.81	259	3.95	127	39.2	1	0	IB	0
NMG591875	1.78	1	222	0	0	0	0	0	0	0	0	8	8	27	249	2.2	0	0	1	1	31	1	1	0	1	2	11.29	183	2.6	84	24.6	0	0	IA	0
NMG593360	3.03	1	279	1	1	0	0	0	0	0	1	7	9	4	283	2.88	1	0	1	4	14	1	1	1	0	0	19.32	255	4.88	174	49.9	0	0	IIB	1
NMG593796	1.26	1	216	1	1	0	0	0	1	1	0	9	9	9	225	1.27	0	1	1	1	14	0	0	0	1	1	7.76	217	3.92	150	44.2	0	0	IB	0
NMG594127	1.2	1	205	0	0	0	0	1	0	0	0	8	8	23	228	1.57	0	0	1	1	15	0	0	0	0	0	3.83	366	2.3	86	25.6	0	0	IIA	0
NMG594249	1.6	0	218	0	0	0	0	1	0	0	0	9	9	22	240	1.76	1	0	1	1	16	0	0	0	0	0	11.57	589	3.37	118	35.6	0	0	IB	0
NMG595074	1.26	1	212	0	0	0	0	1	0	0	1	8	9	33	245	1.79	0	1	1	1	22	0	0	0	0	0	6.41	214	2.27	77	23.1	1	0	IIA	0
NMG595868	1.68	1	219	0	0	0	0	0	0	0	0	9	9	14	233	1.68	0	1	1	2	39	0	0	0	1	1	8.21	465	4.02	139	40.1	0	0	IA	0
NMG596200	1.93	0	242	1	0	0	0	1	0	1	0	9	9	11	253	2.01	0	0	1	1	6	0	0	0	0	0	13.55	457	3.99	133	38.2	0	0	IB	0
NMG596201	1.97	0	242	1	0	0	0	1	0	0	0	9	9	10	252	2.08	0	0	1	1	24	0	0	0	0	0	3.2	318	4.04	139	43.5	0	0	IIB	0
NMG596775	1.94	0	222	1	1	0	0	0	0	0	0	9	9	21	243	2.07	0	0	1	1	23	0	0	0	0	0	6.51	164	4.21	146	43.8	0	0	IIA	0
NMG597624	1.46	1	241	1	0	0	0	0	0	0	0	9	9	3	244	1.45	0	0	1	3	7	0	0	0	0	0	6.37	246	4.37	174	49.7	0	0	IA	0
NMG598221	1.65	1	224	1	0	0	0	1	0	0	0	9	9	9	233	1.6	0	1	1	1	13	0	0	0	0	0	11.91	334	4.8	169	49.5	0	0	IIA	0
NMG598865	1.67	1	228	1	0	0	0	0	0	0	0	9	9	6	234	1.6	1	0	1	1	4	0	0	0	0	0	6.32	135	4.7	176	53.1	0	0	IB	0
NMG601321	2.21	0	256	1	0	0	0	0	0	0	0	9	9	10	266	2.08	0	1	1	2	26	0	0	1	0	0	6.29	371	4.23	163	48.7	0	0	IIB	1
NMG601613	1.58	1	220	0	0	0	0	1	0	1	0	9	9	5	225	1.54	0	1	1	2	10	1	0	0	0	0	15.01	388	3.15	116	33.4	0	0	IA	0
NMG601685	1.37	0	260	1	1	0	0	0	0	0	0	9	9	7	267	1.41	0	1	1	5	7	1	0	0	0	0	4.62	199	3.55	128	38.6	0	1	IB	0
NMG601884	2.4	1	249	1	1	0	0	0	0	0	0	9	9	2	251	2.33	0	0	1	10	1	0	0	0	0	0	11.62	230	6.01	190	57.4	0	0	IB	0
NMG603080	1.2	1	203	1	1	0	0	0	0	0	0	9	9	41	244	1.84	1	1	1	2	21	0	0	0	1	2	8.46	438	2.49	80	24.3	0	0	IIA	0
NMG603176	4.36	0	268	1	1	0	0	0	0	0	0	9	9	5	273	4.4	1	0	1	1	26	1	0	0	0	0	7.14	218	5.9	214	61.3	0	0	IIA	1
NMG603514	1.15	1	239	1	0	0	0	0	0	1	0	9	9	18	257	1.25	0	0	1	18	18	1	0	0	0	0	8.48	173	3.14	111	33.4	0	0	IA	0
NMG604147	3.4	1	282	0	0	0	0	0	0	0	0	9	9	17	299	3.4	1	1	1	16	8	0	0	0	0	0	6.91	548	4.46	147	42.9	0	0	IIA	0
NMG604648	0.85	1	194	1	1	0	0	0	0	0	0	8	9	11	205	0.85	0	1	1	2	28	1	0	0	0	0	16.84	353	3.9	152	42.9	0	0	IIA	0
NMG604737	2	1	231	0	0	0	0	0	0	0	0	9	9	10	241	1.87	1	0	1	9	8	0	0	0	0	0	12.49	534	3.19	117	34.9	0	0	IB	0
NMG605311	0.88	0	190	0	0	0	0	1	0	0	1	7	9	18	208	0.9	0	1	1	1	27	1	0	0	0	0	12.87	284	3.04	108	32.3	0	0	IB	0
NMG605578	1.83	1	212	1	0	0	0	1	0	1	0	9	9	11	223	1.87	0	1	1	1	19	1	0	0	0	0	9.93	332	4.09	142	41.9	0	0	IIA	0
NMG606724	1.32	1	203	1	1	0	0	0	0	1	0	9	9	45	248	1.78	0	1	1	1	14	0	0	0	0	0	7.82	285	3.59	111	31.6	1	0	IIA	0
NMG607443	2.09	1	235	0	0	0	0	0	0	0	0	9	9	9	244	1.96	1	1	1	8	13	0	0	0	0	0	11.49	402	3.81	145	42.4	0	0	IIA	0
NMG607905	2.14	1	250	1	1	0	0	0	0	0	0	9	9	3	253	2.21	0	0	1	13	7	0	0	0	0	0	10.16	378	4.05	136	40.1	0	0	IIA	0
QZ508747	0.99	0	235	1	1	0	0	0	0	0	0	8	9	9	244	1	0	0	1	1	23	1	0	0	0	0	10.3	356	3.7	141	43.2	0	0	IA	0
QZ510576	1.5	1	248	1	0	0	0	1	0	0	0	10	10	16	264	1.75	1	0	0	16	7	0	0	0	0	0	10.4	304	3.83	134	38.5	0	0	IIA	0
QZ512607	2.55	1	249	1	0	0	0	0	0	0	0	10	10	6	255	2.68	1	0	0	6	8	0	0	0	0	0	8.7	327	3.46	124	38.8	0	0	IA	0
QZ512652	2.9	1	256	1	0	0	0	0	0	0	0	9	10	5	261	3.1	0	1	0	6	6	0	0	0	0	0	12.3	328	4.69	162	48	0	0	IA	0
QZ512896	2.4	1	242	1	0	0	0	1	0	0	0	9	10	13	255	2.5	0	1	0	13	7	0	0	0	0	0	10.8	524	3.7	130	36.7	0	0	IA	0
QZ513255	1.09	1	186	0	0	0	0	1	0	1	1	5	7	6	192	1.02	0	0	1	1	31	0	0	0	1	3	27.34	236	4.26	167	48.2	0	0	IIB	0
QZ513303	1.1	0	200	0	0	0	0	0	0	1	0	8	9	11	211	1.05	0	1	1	1	19	1	0	0	0	0	8.3	219	3.14	110	32.1	0	0	IIB	0
QZ513519	1.3	1	214	1	0	0	0	1	0	1	0	8	9	9	223	1.25	0	1	1	9	6	0	0	0	0	0	10.7	191	3.89	142	40.6	0	0	IIA	0
QZ514120	2	1	263	1	0	0	0	0	0	0	0	8	9	5	268	2	1	0	0	5	19	0	0	0	0	0	6.7	139	4.7	156	45.3	0	0	IIA	0
QZ514728	2.45	0	267	0	0	0	0	0	0	0	0	10	10	5	272	2.31	0	0	0	5	16	0	0	0	0	0	11.1	100	4.57	173	51.1	0	0	IIA	0
QZ514823	1.465	0	216	1	1	0	0	0	0	1	0	8	9	15	231	1.63	0	0	0	1	19	0	0	0	0	0	9.2	334	3.94	142	42.6	0	0	IIA	0
QZ514895	1	0	202	1	0	0	0	0	0	1	0	10	10	36	238	1.67	1	0	1	1	32	1	1	0	0	0	3.5	327	2.92	96	28.9	0	0	IA	0
QZ517068	1.55	0	205	1	0	0	0	0	0	0	1	8	9	10	215	1.6	1	1	1	1	24	0	0	0	0	0	9.7	468	4.25	145	44.2	0	0	IIB	0
QZ517461	0.8	0	192	0	0	0	0	1	0	1	0	8	10	32	224	1.22	1	0	1	1	37	1	0	0	1	3	6.7	265	3.4	108	31.5	1	0	IIB	0
QZ517666	2.6	1	251	0	0	0	0	0	0	0	0	10	10	8	259	2.33	0	0	0	3	7	1	0	0	0	0	10.8	359	4.27	149	42.8	0	0	IA	0
QZ518034	2	1	263	0	0	0	0	0	0	0	0	8	9	6	269	2.07	0	0	0	5	10	0	0	0	0	0	4.6	162	3.96	145	42.4	0	0	IA	0
QZ518430	0.6	1	171	0	0	0	0	0	2	1	2	5	8	15	186	0.59	0	1	1	1	22	1	0	0	0	0	18.7	321	2.83	105	31.2	0	0	IIB	0
QZ518696	2.15	0	253	1	0	0	0	0	0	0	0	9	10	7	260	2.29	1	1	0	7	6	0	0	0	0	0	14.3	395	3.99	137	39.2	0	0	IIA	0
QZ519106	2.1	0	253	1	0	0	0	0	0	0	0	9	10	8	261	2.16	1	0	0	10	10	0	0	0	0	0	12.8	554	4.58	156	46.3	0	0	IIA	0
QZ519391	0.8	1	211	1	1	0	0	0	0	1	2	8	8	20	231	1.08	0	1	1	1	35	1	0	0	1	3	10.3	92	2.29	76	23.4	0	0	IIB	0
QZ519546	3.3	1	268	0	0	0	0	0	0	0	0	10	10	2	270	3.16	1	0	0	2	7	0	0	0	0	0	9.6	287	4.9	170	49.1	0	0	IA	0
QZ520955	1.55	1	214	1	0	0	0	0	0	1	0	8	9	25	239	1.88	1	0	1	1	22	0	0	0	0	0	3	396	4.19	125	38.2	0	0	IIIA	1
QZ521451	0.75	0	191	0	0	0	0	0	0	0	0	9	10	25	216	0.97	0	1	1	12	45	1	1	1	1	3	2.3	146	4.87	154	47.4	1	0	IIIB	1
QZ521634	1.7	1	215	1	0	0	0	0	1	1	2	6	9	13	228	1.8	0	1	1	2	16	0	0	0	1	3	9.4	286	2.89	96	29.1	0	0	IA	0
QZ522071	3.18	1	266	1	0	0	0	0	0	0	0	10	10	2	268	3.18	1	0	0	2	15	0	0	0	0	0	6.6	306	4.06	144	43.2	0	0	IIA	1
QZ523275	1.65	0	253	1	0	0	0	0	0	0	1	5	8	5	258	1.65	0	1	1	1	25	1	0	0	0	0	7.4	188	3.82	146	42.8	0	0	IIB	1
QZ523387	3.7	1	265	1	0	0	0	0	0	0	0	9	10	3	268	3.57	0	0	0	3	13	0	0	0	0	0	12.9	208	4.97	156	48.2	0	0	IIB	0
QZ524797	1.58	0	210	0	0	0	0	1	0	0	0	10	10	13	223	1.56	1	0	1	13	6	0	0	0	0	0	16.8	395	3.87	131	38.6	0	0	IIA	0
QZ524946	2.5	1	251	1	1	0	0	0	0	0	0	9	10	7	258	2.64	1	0	0	7	10	0	0	0	0	0	13.8	168	4.62	166	46.7	0	0	IIB	0
QZ525515	2.6	1	250	0	0	0	0	0	0	0	0	10	10	9	259	2.48	1	0	1	9	5	0	0	0	0	0	14.1	555	3.65	129	37	0	0	IIB	0
QZ526852	0.99	1	183	0	0	0	0	1	0	1	0	8	8	42	225	1.5	1	1	1	1	60	0	0	0	1	3	5.7	489	2.53	88	27.1	0	0	IA	0
QZ527218	1.8	1	211	0	0	0	0	0	0	1	0	9	9	12	223	1.85	0	0	1	1	25	1	0	0	0	0	8.5	398	3.61	121	34.2	0	0	IA	0
QZ527225	2.2	0	272	0	0	0	0	0	0	0	0	9	9	3	275	2.11	0	0	0	3	8	0	0	0	0	0	5.8	190	5.53	200	56.9	0	0	IA	0
QZ527800	1.95	1	232	0	0	0	0	1	0	0	0	9	10	10	242	1.95	0	0	0	10	8	0	0	0	0	0	6.4	339	4.83	182	51.2	0	0	IIA	0
QZ529969	1.22	0	202	1	0	0	0	0	1	1	3	2	8	1	203	1.22	0	1	1	1	29	0	0	0	0	0	14.1	101	3.78	140	41.2	0	0	IIB	0
QZ530167	1.15	0	211	0	0	0	0	0	0	0	0	8	9	13	224	1.21	0	1	1	1	17	0	0	0	0	0	7.3	233	3.42	126	37.1	0	0	IA	0
QZ531205	1.67	1	213	0	0	0	0	1	0	1	0	10	10	15	228	1.9	0	1	1	1	18	0	0	0	0	0	7.8	323	4.33	150	43.1	0	0	IA	0
QZ532990	1.85	0	240	1	0	0	0	0	0	1	0	8	9	7	247	1.89	0	0	1	7	8	0	0	0	0	0	15.4	430	4.04	142	42.2	0	0	IIA	0
QZ533831	1.5	0	268	1	0	0	0	0	0	0	0	9	10	5	273	1.7	0	0	0	5	12	0	0	0	0	0	12.1	217	5.41	177	51	0	0	IB	0
QZ535368	2.65	1	266	0	0	0	0	0	0	0	0	10	10	3	269	2.68	0	0	0	3	10	0	0	0	0	0	9.1	210	5.04	180	50.1	0	0	IIB	0
QZ536864	2.9	0	280	1	0	0	0	0	0	0	0	10	10	4	284	2.9	0	0	0	4	11	0	0	0	0	0	16.4	209	4.82	162	47.3	0	0	IA	0
QZ538024	1.6	0	244	1	1	0	0	0	0	0	1	7	10	12	256	1.69	0	0	0	12	6	0	0	0	0	0	13	283	4.29	149	43.2	0	0	IIA	0
QZ538375	3.25	0	266	1	0	0	0	0	0	0	2	4	8	5	271	3.66	0	0	0	5	7	0	0	0	0	0	16	280	4.12	144	41.4	0	0	IIA	0
QZ538556	1.8	1	219	1	0	0	0	1	0	1	0	7	9	15	234	1.93	1	1	1	1	19	0	0	0	0	0	12.2	353	3.77	131	36.9	0	0	IB	0
QZ543969	2.75	0	263	0	0	0	0	1	0	0	0	10	10	3	266	2.7	0	0	0	3	7	0	0	0	0	0	13	285	4.32	149	43.6	0	0	IB	0
QZ544651	3.4	1	275	0	0	0	0	0	0	0	0	10	10	2	277	3.31	1	1	0	2	10	0	0	0	0	0	10.5	263	4.39	147	45.2	0	0	IB	0
QZ544818	2.4	0	245	1	0	0	0	0	0	0	1	7	8	11	256	2.2	1	1	0	11	6	0	0	0	0	0	9.6	500	4.11	140	42.7	0	0	IB	0
QZ545643	2.23	0	254	0	0	0	0	0	0	0	0	9	10	6	260	2.37	0	0	0	6	8	0	0	0	0	0	12.7	209	4.47	146	44	0	0	IB	0
QZ546463	3.4	0	266	0	0	0	0	1	0	0	0	10	10	8	274	3.45	1	0	0	8	8	0	0	0	0	0	15.5	374	5.38	187	55.1	0	0	IIB	0
QZ547508	2.35	1	265	0	0	0	0	0	0	0	0	10	10	8	273	2.44	1	0	0	7	6	0	0	0	0	0	13.3	279	4.72	159	47.4	0	0	IIB	0
QZ548074	3.75	1	280	0	0	0	0	0	0	0	0	10	10	4	284	3.61	0	0	0	4	10	0	0	0	0	0	14	257	4.95	167	48.9	0	0	IA	0
QZ548166	1.1	0	187	0	0	0	0	1	0	1	0	8	9	41	228	1.84	1	0	1	40	11	1	0	0	1	1	3.6	370	3.31	99	30.3	0	0	IIB	0
QZ548528	1.6	0	221	0	0	0	0	0	0	0	1	6	8	9	230	1.58	0	1	1	9	8	1	0	0	0	0	18.3	314	4.12	145	42.4	0	0	IB	0
QZ548855	1	1	187	0	0	0	0	0	1	0	0	8	9	8	195	1.01	0	1	1	1	12	1	1	1	0	0	19.6	24	2.21	82	25.2	0	1	IIIB	0
QZ550986	2.6	1	246	0	0	1	0	0	1	0	0	9	10	11	257	2.6	1	0	0	10	10	0	0	0	0	0	16	243	3.93	133	38.4	0	0	IIA	0
QZ551230	3.25	1	256	1	0	0	0	1	0	0	0	8	9	35	291	3.4	1	1	0	1	41	1	0	0	0	0	4.9	159	4	122	36	1	0	IB	0
QZ551354	0.92	1	197	1	0	0	0	1	0	1	2	8	8	19	216	1.1	1	1	1	1	52	0	1	0	0	0	11.7	334	3.21	101	30.7	0	0	IIB	1
QZ551411	2.01	0	259	1	0	0	0	0	0	1	0	10	10	6	265	2	0	0	0	5	23	0	0	0	0	0	7.6	195	5.35	186	55.3	0	0	IIA	0
QZ551659	2.5	1	253	1	0	0	1	0	0	1	0	10	10	5	258	2.49	0	0	0	4	7	0	0	0	0	0	10	227	3.64	130	37.5	0	0	IB	0
QZ551660	1.99	1	253	1	0	0	1	0	0	1	0	9	9	5	258	1.95	0	0	0	4	35	0	0	0	0	0	3.2	186	5.12	181	54.1	0	0	IIB	0
QZ552028	1.2	1	198	0	0	0	0	0	0	1	1	6	7	5	203	1.16	0	0	1	1	38	1	1	0	0	0	12.5	207	2.95	134	36.2	0	1	IIB	1
QZ553340	2.7	1	268	0	0	0	0	0	0	1	0	10	10	2	270	2.45	2	0	0	3	29	0	0	0	0	0	4.9	225	5.42	178	51.5	0	0	IIA	1
QZ553541	0.8	0	216	0	1	0	0	1	0	1	0	9	9	6	222	0.8	0	0	1	2	20	0	0	0	0	0	9.3	150	3.81	140	41.8	0	0	IB	0
QZ554021	1.4	1	201	0	0	0	0	0	0	1	0	9	9	14	215	1.43	1	0	1	13	18	0	0	0	0	0	4.6	541	3.11	91	28.5	0	0	IIA	1
QZ555043	2.7	1	246	1	0	0	0	1	0	1	0	10	10	10	256	2.81	1	0	0	1	10	0	0	0	0	0	14.8	425	3.78	124	36.4	0	0	IIA	0
QZ555204	0.58	1	166	0	0	0	0	0	0	1	1	6	9	81	247	1.6	1	1	1	1	121	0	0	1	1	3	3.6	50	3.27	95	29.8	1	0	IIIB	1
QZ555977	1.19	0	218	1	0	0	1	1	0	1	2	8	9	40	258	1.94	1	1	1	43	58	0	0	1	1	1	5	424	3.14	96	30.4	0	0	IIIB	1
QZ556395	1.8	1	245	1	0	0	0	0	0	1	0	8	9	14	259	2.03	1	0	0	13	14	1	0	0	0	0	3.9	142	3.37	113	35.7	0	0	IB	0
QZ556754	2.3	1	265	1	0	0	0	0	0	1	1	7	10	7	272	2.33	2	0	0	6	41	0	0	0	0	0	8.9	262	2.67	95	28.3	0	0	IIA	0
QZ557835	1.6	0	220	1	0	0	0	0	2	1	0	8	9	18	238	1.6	1	0	1	1	15	0	0	0	0	0	10.2	338	3.34	117	33.6	0	0	IIB	0
QZ558157	1.4	1	234	1	0	0	0	1	0	1	1	6	8	24	258	1.83	0	0	0	1	8	0	0	0	0	0	16.7	371	3.39	117	33.8	0	0	IIA	0
QZ559475	2.25	0	238	0	0	0	0	1	0	1	0	9	9	16	254	2.27	0	0	0	15	6	0	0	0	0	0	11.1	506	3.24	109	32.8	0	0	IIA	0
QZ559520	1.43	0	210	1	0	0	0	0	2	1	2	5	8	4	214	1.35	0	0	1	1	11	0	0	1	0	0	7.9	209	4.24	152	46.5	0	0	IIIB	1
QZ560112	0.91	0	210	1	1	0	0	0	0	1	0	8	9	29	239	1.35	0	0	1	1	55	1	0	0	0	0	3.5	213	3.28	122	37.3	0	0	IIB	1
QZ560131	0.75	0	201	1	1	0	0	0	0	1	0	8	9	31	232	1.14	0	0	1	1	50	0	0	0	0	0	5.2	267	3.39	116	37.1	0	0	IIA	1
QZ560330	1.47	1	209	1	0	0	0	1	0	1	0	8	9	22	231	1.9	0	0	1	1	28	1	0	0	0	0	8	217	3.38	119	35.6	0	0	IIB	0
QZ560414	1.51	0	223	0	0	0	0	0	0	1	0	10	10	14	237	1.61	0	0	0	17	13	0	0	0	0	0	6.6	375	2.38	83	24.9	0	0	IB	0
QZ561005	1.48	1	208	1	0	0	0	0	0	1	0	10	10	2	210	1.4	0	0	1	2	13	0	0	0	0	0	11.6	163	3.62	135	41.3	1	0	IIB	0
QZ561287	1.15	0	228	1	1	0	0	0	0	1	0	8	9	17	245	1.46	0	0	1	16	17	1	0	0	0	0	4.5	207	3.64	136	41.2	0	0	IIA	0
QZ561487	2.4	1	237	1	0	0	0	1	0	1	0	8	9	11	248	2.41	0	0	0	1	16	0	0	0	0	0	33	291	3.9	140	41.6	0	0	IIA	0
QZ563126	1.185	1	197	1	0	0	0	1	0	1	0	8	9	17	214	1.18	0	1	1	1	23	0	0	0	1	3	4	277	2.64	100	28.1	0	0	IB	0
QZ563489	0.82	1	180	0	0	0	0	1	0	1	2	6	8	12	192	0.76	0	1	1	1	28	0	1	1	1	3	36	27	4.2	101	31.8	1	0	IIIB	0
QZ565612	1.6	0	224	1	0	0	0	0	1	1	0	9	10	25	249	1.9	1	0	1	1	14	0	0	0	0	0	8.4	608	3.55	124	36.8	0	0	IIA	0
QZ566074	2.05	1	229	0	0	0	0	1	0	1	0	10	10	13	242	2.13	1	0	0	1	43	0	1	0	0	0	10.4	312	4.87	169	49.2	0	0	IIIA	1
QZ567195	2	0	230	1	0	0	0	0	2	1	0	9	9	18	248	2.15	0	0	0	17	8	0	0	0	0	0	14.3	441	3.66	129	38.2	0	0	IIA	0
QZ569760	3.27	1	284	0	0	0	0	0	0	1	0	8	10	1	285	3.18	0	0	0	2	32	1	0	0	0	0	13.7	245	5.55	192	57	0	0	IIA	1
QZ570982	2.25	1	268	0	0	0	0	0	0	0	0	10	10	2	270	2.27	0	0	0	6	4	0	0	0	0	0	18.9	309	4.67	165	46.5	0	0	IIA	0
QZ571382	1.68	1	212	1	0	0	0	0	0	1	0	8	9	22	234	2.01	1	0	1	1	13	0	0	0	0	0	10.4	459	4.56	155	45.8	0	0	IIA	0
QZ574079	1	0	188	0	0	0	0	0	0	1	2	4	7	27	215	1.13	0	1	1	1	46	0	1	1	0	0	12.3	325	2.92	99	29.7	0	0	IIIB	1
QZ574895	3.2	1	260	1	0	0	0	0	0	1	1	5	9	3	263	3.07	2	0	0	3	16	0	1	1	0	0	3.6	194	3.98	145	43	0	0	IIIB	1
QZ575945	1.15	1	203	1	0	0	0	0	2	1	2	5	8	52	255	2.5	1	0	1	1	47	1	0	0	0	0	4.8	350	3.08	95	28.5	0	0	IIA	0
QZ576255	1.82	1	218	1	0	0	0	1	0	1	0	10	10	21	239	2.13	1	0	0	1	14	0	0	0	0	0	13.6	451	4.37	147	43.1	0	0	IIA	0
QZ578484	4.02	0	264	0	0	0	0	1	0	1	1	7	9	11	275	4	1	0	0	1	13	0	0	0	0	0	15.1	692	3.33	113	33.3	0	0	IIA	0
QZ578602	2.05	1	234	0	0	0	0	1	0	1	0	10	10	7	241	2.03	0	0	0	1	14	0	0	0	0	0	9.8	238	3.76	146	41.3	0	0	IIA	0
QZ578822	1.2	1	223	1	1	0	0	0	0	1	0	8	8	3	226	1.17	0	0	1	1	15	0	0	0	0	0	5.6	121	3.88	152	43.7	0	0	IB	0
QZ579630	1.75	0	243	1	1	0	0	0	0	1	0	8	9	17	260	1.89	1	0	1	15	14	0	0	0	0	0	4.1	300	3.06	109	32.8	0	0	IIB	0
QZ580643	1.18	1	196	1	0	0	0	1	0	1	2	3	7	17	213	1.3	0	1	1	1	20	0	0	0	0	0	16.6	359	2.26	81	23.7	1	0	IA	0
QZ580797	1.75	0	226	1	0	0	0	1	1	1	0	8	9	12	238	1.81	0	0	1	1	22	0	0	0	0	0	9.7	562	3.65	134	37.6	0	0	IIA	0
QZ580957	1.07	1	191	0	0	0	0	0	1	1	0	8	9	21	212	1.18	0	1	1	1	42	0	1	0	0	0	11.1	355	3.35	117	34.8	0	0	IIA	1
QZ581277	2.4	0	268	1	0	0	0	0	0	1	0	10	10	6	274	2.46	0	0	0	5	3	0	0	0	0	0	8.1	278	4.06	147	41.5	0	0	IIA	0
QZ581794	1.16	0	196	0	0	0	0	1	0	1	0	9	10	19	215	1.15	0	1	1	1	37	1	0	0	0	0	5.1	48	3.04	103	29.8	0	0	IIA	0
QZ581828	1.71	1	208	0	0	0	0	0	0	1	0	9	10	22	230	1.65	1	0	1	1	21	0	0	0	0	0	12.4	312	3.61	119	35.5	0	0	IIA	0
QZ581965	2.85	1	269	0	0	0	0	0	0	0	0	3	6	6	275	2.91	1	0	0	5	13	0	0	0	0	0	24.2	356	4.18	141	39.9	0	0	IIA	0
QZ582720	1.1	1	188	0	0	0	0	1	0	1	1	7	7	24	212	1.2	1	0	1	1	36	1	1	0	0	0	28.8	500	3.49	117	32.1	0	0	IIA	1
QZ583374	2.75	0	255	1	0	0	0	0	0	0	0	10	10	5	260	2.6	0	0	0	4	15	0	0	0	0	0	6.6	180	4.51	161	46.6	0	0	IIA	0
QZ583529	0.76	1	172	0	0	0	0	0	0	0	2	1	7	11	183	0.63	0	1	1	1	54	1	1	1	0	0	33.9	187	3.71	120	34.7	1	0	IIIB	1
QZ584476	3.05	1	250	1	0	0	0	1	0	0	0	9	10	7	257	3.02	1	0	0	6	13	0	0	0	0	0	15	462	4.68	154	43.7	0	0	IIA	0
QZ585438	2.25	1	245	1	0	0	0	1	0	0	0	9	10	12	257	2.32	1	0	0	12	7	0	0	0	0	0	14	456	4.06	149	42.5	0	0	IIB	0
QZ585639	1.5	1	216	1	0	0	0	0	0	1	2	6	9	26	242	1.74	1	0	0	1	21	0	0	0	0	0	9.7	349	2.76	100	27.9	0	0	IIA	0
QZ586085	0.72	1	175	0	0	0	0	0	0	0	2	2	7	7	182	0.72	0	1	1	1	11	1	0	1	0	0	17	80	4.16	131	38.7	1	0	IIIB	0
QZ586152	2.7	1	256	1	0	0	0	0	0	0	0	9	9	17	273	2.95	1	0	0	21	5	0	0	0	0	0	10.6	329	2.85	98	27.5	0	0	IIB	0
QZ587024	1.95	1	229	1	0	0	0	0	0	1	0	8	9	23	252	2.11	1	0	0	1	9	0	0	0	0	0	11.6	263	4.28	120	35.4	0	0	IIA	0
QZ587633	1.9	1	234	1	0	0	0	1	0	1	0	9	10	11	245	1.89	0	0	0	1	14	0	0	0	0	0	14	376	4.55	167	47.2	0	0	IIA	0
QZ589259	1.65	0	261	1	0	0	0	0	0	0	0	9	10	14	275	1.9	1	0	0	4	13	0	0	0	0	0	10.6	340	4.17	156	43.6	0	0	IIA	0
QZ590223	2.48	0	255	1	1	0	0	0	0	1	0	9	10	6	261	2.41	0	0	0	4	8	0	0	0	0	0	8.9	233	4.27	149	41.7	0	0	IIB	0
QZ590230	3.1	1	258	1	0	0	0	1	1	0	2	7	10	4	262	3	0	0	0	4	3	0	0	0	0	0	5.4	126	4.45	159	44.1	0	0	IIB	0
QZ590388	2.15	0	256	1	0	0	0	1	0	1	0	9	10	9	265	2.3	0	0	0	8	2	0	0	0	0	0	9.5	403	4.16	145	41.3	0	0	IIA	0
QZ590646	1.85	0	232	0	0	0	0	1	0	1	0	8	8	10	242	1.88	1	0	0	1	10	0	0	0	0	0	13.9	405	3.52	132	38.4	0	0	IIB	0
QZ590711	1.88	1	231	1	0	0	0	0	2	1	1	7	8	15	246	1.8	1	0	0	1	8	0	0	0	0	0	12.8	463	4.5	153	43.3	0	0	IIA	0
QZ590787	1.58	1	238	1	0	0	0	1	0	1	0	10	10	7	245	1.6	0	0	1	6	23	0	0	0	0	0	7	196	4.37	174	49.9	0	0	IIA	0
QZ590810	0.86	0	206	1	1	0	0	0	0	1	0	8	9	5	211	0.84	0	0	1	1	10	0	0	0	0	0	5.5	109	5.58	176	57.3	0	0	IIA	0
QZ591102	3.05	1	256	1	0	0	0	0	0	0	0	10	10	10	266	3.15	1	0	0	10	3	0	0	0	0	0	11.7	342	4.42	155	43	0	0	IIA	0
QZ591321	2.15	0	247	1	0	0	0	1	0	0	0	9	10	6	253	2.17	1	0	0	6	5	0	0	0	0	0	11.2	210	4.82	179	50.4	0	0	IIB	0
QZ591871	3.1	0	274	3	0	0	0	0	0	0	0	10	10	2	276	3.08	3	1	0	2	4	0	0	0	0	0	18.3	255	4.71	168	47	0	0	IIB	0
QZ592149	2.425	0	267	0	0	0	0	0	0	0	0	10	10	7	274	2.32	0	0	0	6	5	0	0	0	0	0	11.7	204	4.63	173	49.2	0	0	IIA	0
QZ592168	2.85	1	279	0	0	0	0	0	0	0	0	7	8	4	283	2.9	1	0	0	3	19	0	0	0	0	0	6	286	4.17	147	41.7	0	0	IIA	0
QZ592242	1.23	0	225	1	1	0	0	0	0	0	2	8	9	43	268	2.14	1	0	1	3	16	0	0	0	0	0	9.88	244	3.85	124	37.7	1	0	IB	0
QZ592301	1.65	0	239	0	0	0	0	1	0	1	0	10	10	15	254	1.81	1	0	0	1	14	0	0	0	0	0	9.6	592	3.46	119	34.7	0	0	IIA	0
QZ592373	2.5	1	256	1	0	0	0	0	0	0	0	10	10	8	264	2.5	1	0	0	8	7	0	0	0	0	0	11.4	279	4.64	157	45.9	0	0	IIA	0
QZ592564	2.7	1	256	1	0	0	0	0	0	1	0	9	10	5	261	2.64	0	0	0	4	6	1	0	0	0	0	8.9	216	4.59	159	44.6	0	0	IB	0
QZ592778	3.2	1	268	0	0	0	0	0	0	0	0	10	10	3	271	3.08	1	0	0	2	6	0	0	0	0	0	9.8	276	4.65	165	45.8	0	0	IB	0
QZ592894	2.75	1	253	0	0	0	0	1	0	0	0	10	10	19	272	3.33	1	0	0	18	5	0	0	0	0	0	13.2	448	3.2	112	32.8	0	0	IIA	0
QZ593226	2.4	0	245	1	0	0	0	0	0	1	0	8	9	5	250	2.37	0	1	0	5	8	0	0	0	0	0	9.5	173	4.28	149	42.5	0	0	IB	0
QZ593228	2.95	1	274	0	0	0	0	0	0	0	0	10	10	4	278	2.76	0	0	0	3	11	0	0	0	0	0	9	364	4.39	157	43.4	0	0	IIA	0
QZ593234	2.7	0	258	0	0	0	0	1	0	0	0	10	10	5	263	2.71	1	1	0	5	7	0	0	0	0	0	12.5	220	4.24	115	46.1	0	0	IIA	0
QZ593308	2.25	1	238	0	0	0	0	1	0	1	0	9	10	19	257	2.41	1	0	0	21	7	0	0	0	0	0	8.9	224	3.13	109	31.5	0	0	IA	0
QZ593547	2.15	1	259	1	0	0	0	0	0	0	0	10	10	14	273	2.44	0	0	0	3	7	0	0	0	0	0	7	331	3.8	133	38.2	0	0	IIB	0
QZ593708	2.75	1	273	1	0	0	0	0	0	0	0	9	10	3	276	2.94	1	0	0	2	26	0	0	0	0	0	8.4	295	4.82	173	49.4	0	0	IIB	1
QZ594232	2.85	1	251	1	0	0	0	1	0	0	0	10	10	20	271	3.29	1	0	0	21	6	0	0	0	0	0	7.1	313	4.44	149	45.4	0	0	IIB	0
QZ595155	1.7	0	248	1	0	0	0	1	0	0	0	9	10	14	262	1.92	1	0	0	13	5	0	0	0	0	0	9.4	497	4.53	154	44.5	0	0	IIA	0
QZ595280	3.5	1	267	1	1	0	0	0	0	0	0	10	10	2	269	3.47	1	0	0	2	4	0	0	0	0	0	13	216	4.66	171	49.1	0	0	IB	0
QZ595542	2.73	1	257	0	0	0	0	0	0	0	0	10	10	3	260	2.81	1	0	0	3	7	0	0	0	0	0	7.7	219	5.12	180	49.2	0	0	IIB	0
QZ595552	2.8	1	253	0	0	0	0	0	0	1	0	10	10	3	256	2.84	0	0	1	2	14	0	0	0	0	0	4.6	253	4.29	158	44.8	0	0	IIA	0
QZ596059	1.65	1	247	1	1	0	0	0	1	0	2	3	6	19	266	1.92	1	0	0	3	9	0	0	0	0	0	8.9	352	3.75	137	38.6	0	0	IIA	0
QZ596492	2.75	1	272	1	0	0	0	0	0	0	0	9	10	26	298	3.36	1	0	0	26	8	0	0	0	0	0	13.11	396	4.71	148	45.9	0	0	IIA	0
QZ596618	2.1	0	259	1	0	0	0	0	0	1	0	10	10	10	269	2.2	1	0	0	10	3	0	0	0	0	0	10.4	409	4.64	165	46	0	0	IB	0
SH20223998	1.45	0	218	1	0	0	0	1	0	1	0	10	10	31	249	1.95	1	0	0	1	59	1	1	0	1	1	1.75	191	3.44	118	32.5	0	0	IB	0
SH20224452	1.54	1	222	0	0	0	0	1	0	0	1	10	10	24	246	2.04	0	0	0	2	16	1	0	0	0	0	9.54	275	3.45	114	32.1	0	0	IA	0
SH20225283	1.39	1	217	0	0	0	0	1	0	1	0	8	9	15	232	1.5	1	0	1	15	11	0	0	0	0	0	14.81	182	4.77	160	42.5	0	0	IA	0
SH20227586	1.345	1	209	1	0	0	0	0	0	0	3	7	3	26	235	1.85	0	1	1	2	25	1	0	0	0	0	10.56	382	3.03	101	27.9	0	0	IB	0
SH20230951	1.72	1	214	0	0	0	0	0	0	1	0	9	10	53	267	2.17	1	1	0	1	32	1	0	0	0	0	5.61	230	3.25	103	28.4	0	0	IIB	1
SH20232912	1.465	0	246	1	1	0	0	0	0	0	0	8	8	6	252	1.44	0	0	0	7	7	0	0	0	0	0	12.78	161	5.1	192	53.4	0	0	IB	0
SH20234568	0.81	1	197	1	1	0	0	0	0	0	1	8	10	95	292	2.13	1	1	1	1	67	1	0	0	1	3	26.39	331	4.67	135	39.4	1	0	IIA	1
SH20234653	2.36	0	241	1	0	0	0	0	0	0	1	8	10	4	245	2.27	0	0	0	5	10	0	0	0	0	0	11.21	269	5.16	185	48.4	0	0	IB	0
SH20235209	1.465	1	218	0	0	0	0	1	0	1	0	9	9	21	239	1.96	1	0	0	1	31	1	0	0	0	0	12.27	254	3.84	126	34.6	0	0	IB	0
SH20235354	1.81	1	260	1	0	0	0	0	0	0	0	9	9	7	267	1.87	1	0	0	8	18	1	0	0	0	0	12.57	122	4.9	166	46.2	0	0	IIA	0
SH20239820	0.79	1	206	1	1	0	0	0	0	0	0	9	9	29	235	1.15	0	0	1	1	40	1	0	0	0	0	8.6	78	3.19	105	29.4	1	0	IB	0
SH20241211	1.29	1	201	0	0	0	0	0	0	0	1	5	9	31	232	1.75	1	0	1	1	26	1	0	0	1	1	8.41	344	4.41	143	40.4	1	0	IB	0
SH20241842	1.39	1	203	1	0	0	0	0	0	0	0	10	10	29	232	1.78	1	0	0	1	22	1	0	0	0	0	6.7	274	3.97	128	35	1	0	IA	0
SH20243408	1.75	0	218	0	0	0	0	0	0	1	0	9	10	11	229	1.8	1	0	0	1	21	0	0	0	0	0	15.35	421	5.23	182	48.4	0	0	IIA	0
SH20245272	1.29	0	225	1	0	0	0	1	0	1	1	7	9	19	244	1.45	1	1	0	1	23	1	0	0	0	0	4.29	320	3.65	134	35.5	0	0	IIA	0
SH20246873	1.855	0	245	1	1	0	0	0	0	0	0	9	9	6	251	1.71	0	0	0	8	17	1	0	0	0	0	7.37	213	2.98	96	27.8	1	0	IIB	0
SH20248142	1.335	1	213	1	0	0	0	0	0	1	1	6	9	20	233	1.52	0	0	1	1	57	1	0	0	0	0	8.34	731	2.52	94	26	0	0	IIB	0
SH20249094	0.77	1	189	1	0	0	0	1	1	1	2	6	8	11	200	0.75	0	0	1	1	19	1	1	1	0	0	20.88	14	3.04	122	31.7	0	0	IB	1
SH20254942	1.875	0	239	1	0	0	1	0	0	1	1	9	9	7	246	1.81	0	0	0	7	19	0	0	0	0	0	14.77	329	4.79	175	48.5	0	0	IB	0
SH20254943	2.22	1	239	1	0	0	1	0	0	1	1	9	9	12	251	2.07	1	0	0	12	15	0	0	0	0	0	16.06	549	5.88	201	52.2	0	0	IIB	0
SH20256895	1.78	1	228	1	0	0	0	0	2	1	1	8	9	7	235	1.87	0	1	0	1	23	1	1	0	0	0	10.42	28	2.94	103	28	0	0	IIB	0
SH20257311	2.95	1	273	1	0	0	0	0	0	0	0	10	10	5	278	2.83	0	0	0	5	14	0	0	0	0	0	12.64	277	6.07	212	57.8	0	0	IIA	0
SH20257419	0.85	1	181	0	0	0	0	0	0	0	2	4	7	64	245	1.79	1	1	1	1	72	1	0	0	1	2	9.32	927	3.59	106	30.3	0	0	IIB	0
SH20259064	1.41	1	215	0	0	0	0	1	0	0	0	10	10	28	243	1.74	1	1	0	1	18	1	0	0	0	0	14.04	369	3.49	124	35.5	0	0	IIB	1
SH20259400	2.795	0	251	1	1	0	0	0	0	0	1	9	10	6	257	2.6	0	1	0	6	15	1	0	0	0	0	6.27	198	4.4	153	43	0	0	IIB	0
SH20260470	2.41	1	250	1	0	0	1	0	0	0	0	10	10	5	255	2.28	1	1	0	5	2	1	1	0	0	0	2.17	229	4.93	177	50.3	0	0	IIA	0
SH20260674	2.31	1	255	1	0	0	0	0	0	0	0	9	9	6	261	2.35	1	1	0	6	17	1	0	0	0	0	13.62	450	3.18	107	29.9	0	0	IIA	0
SH20261560	1.875	1	244	1	0	0	0	1	0	0	1	9	10	4	248	1.78	0	0	1	4	22	1	1	0	0	0	3.24	16	4.38	161	44	0	0	IB	0
SH20261991	2.85	1	255	1	0	0	0	1	0	0	0	9	10	7	262	2.64	1	0	0	7	18	0	0	0	0	0	9.38	331	4.21	151	41	0	0	IIB	1
SH20262386	1.15	1	193	1	0	0	0	1	1	1	1	8	8	13	206	1.16	1	1	1	1	37	1	0	0	0	0	5.53	164	3.06	99	26.8	0	0	IIIA	1
SH20262394	2.56	0	258	1	0	0	0	0	0	0	0	9	10	8	266	2.48	1	0	0	9	15	0	0	0	0	0	11.74	315	4.23	152	41	0	0	IIA	0
SH20262986	2.37	0	260	1	0	0	0	0	0	0	0	9	10	6	266	2.22	1	0	0	6	16	0	0	0	0	0	13.92	505	3.83	139	37.7	0	0	IIA	0
SH20264932	1.07	0	198	1	0	0	0	0	2	0	1	8	8	31	229	1.43	1	1	1	3	37	1	1	0	1	1	8.28	375	2.17	78	21.3	0	0	IA	0
SH20265355	1.205	0	199	1	0	0	0	0	0	1	1	8	8	19	218	1.45	0	1	1	1	36	1	1	0	1	1	5.78	363	3.6	128	35.3	1	0	IA	0
SH20267876	1.375	0	212	0	0	0	0	0	0	0	1	8	10	24	236	1.8	0	1	1	1	24	1	0	0	0	0	3.59	185	2.79	100	26.8	1	0	IA	0
SH20269708	1.675	0	219	0	0	0	0	0	0	0	0	9	9	29	248	1.98	1	1	0	1	30	1	0	0	0	0	14.25	321	3.03	102	28.2	0	0	IB	0
SH20269715	1.18	0	195	0	0	0	0	0	0	0	3	7	9	10	205	1.06	0	1	1	1	55	1	0	0	1	2	11.39	220	3.26	113	30.1	0	0	IIA	0
SH20269839	1.32	1	206	1	0	0	0	0	0	1	1	9	9	28	234	1.61	0	0	0	1	35	1	1	0	0	0	15.68	425	3.1	109	29.1	0	0	IA	0
SH20270501	1.51	1	240	1	0	0	0	0	0	1	0	8	9	16	256	1.62	0	0	0	3	60	1	0	0	0	0	5.69	183	3.38	120	34.4	0	0	IA	0
SH20270538	1.22	0	212	1	1	0	0	0	0	1	1	7	8	32	244	1.63	0	0	0	1	30	0	0	0	0	0	12.01	327	3.19	110	30.2	0	0	IA	0
SH20270594	2.3	1	234	1	0	0	0	1	0	0	0	5	9	7	241	2.36	1	0	0	1	22	0	0	0	0	0	22.35	383	3.78	138	36.9	0	0	IB	0
SH20270625	1.48	0	205	1	0	0	0	0	1	0	2	1	6	28	233	1.82	0	0	1	1	39	1	1	0	1	2	7.27	354	3.92	125	34.3	1	0	IIA	1
SH20270653	2.4	1	243	1	0	0	0	0	1	0	3	4	8	5	248	2.35	0	0	0	1	16	0	0	0	0	0	9.12	207	5.62	190	52.4	0	0	IIB	0
SH20271180	0.78	1	184	1	1	0	0	0	0	0	2	5	7	25	209	1.04	0	1	1	1	108	1	1	0	1	3	6.85	160	4.08	120	33.9	1	0	IIIA	0
SH20271221	1.32	1	225	1	0	0	0	1	0	0	2	8	9	10	235	1.6	0	0	1	1	18	0	0	0	0	0	19.95	230	4.44	164	44.8	0	0	IA	0
SH20272700	2.21	0	236	1	0	0	0	0	0	1	0	8	9	6	242	2.14	0	0	1	7	17	1	0	0	0	0	6.2	259	3.2	116	34.4	0	0	IA	0
SH20274358	1.71	1	222	0	0	0	0	0	0	0	1	7	8	26	248	2.01	1	1	0	1	53	0	0	0	0	0	11.03	524	3.72	127	33.5	0	0	IIA	0
SH20274670	0.925	1	199	1	1	0	0	0	0	0	2	5	8	41	240	1.5	1	0	0	1	23	1	0	0	1	2	12.46	700	2.59	89	24.6	0	0	IIA	0
SH20275193	1.98	0	255	1	1	0	0	0	0	0	0	9	10	5	260	1.95	1	0	0	4	33	1	0	1	0	0	14.81	278	4.14	146	40.2	0	0	IIB	1
SH20275806	1.89	1	227	1	0	0	0	1	1	0	0	9	10	22	249	2.05	0	0	0	1	31	0	0	0	0	0	13.91	341	4.25	152	42.8	0	0	IIB	0
SH20278135	1.66	1	212	1	0	0	0	0	0	0	1	7	8	14	226	1.73	0	1	0	1	28	1	0	0	0	0	19.2	395	4.1	153	41.9	0	0	IA	0
SH20279944	0.985	0	192	0	0	0	0	0	0	0	2	6	8	54	246	1.86	0	1	1	1	101	1	1	0	1	2	2.91	215	5.43	155	42.9	1	0	IIB	1
SH20281579	2.015	0	227	1	0	0	0	0	0	1	0	8	9	13	240	2	1	0	0	13	17	0	0	0	0	0	12.63	634	3.48	119	33	0	0	IIA	0
SH20282077	1.92	0	233	1	0	0	0	1	0	0	1	8	10	10	243	1.88	1	0	0	1	14	1	0	0	0	0	18.57	384	5.5	208	58.2	0	0	IIA	0
SH20282210	1.12	1	213	1	1	0	0	0	0	0	1	8	9	23	236	1.43	0	0	0	1	48	1	0	0	0	0	8.88	187	2.71	105	27.9	0	0	IA	0
SH20283004	1.41	1	226	1	1	0	0	0	0	0	1	9	9	32	258	1.9	0	0	0	2	29	1	0	0	0	0	9.13	360	3.24	111	30.8	0	0	IB	0
SH20283426	1.13	0	195	0	0	0	0	1	0	1	2	6	8	35	230	1.62	1	0	1	1	26	1	0	0	1	2	7.69	339	4.8	141	41.6	0	0	IA	0
SH20283429	1.69	1	225	1	0	0	0	1	0	1	1	8	9	19	244	1.91	0	0	0	1	27	1	0	0	0	0	7.04	134	5.28	182	50.5	0	0	IB	0
SH20283840	1.21	1	206	1	0	0	0	0	0	0	2	8	8	24	230	1.4	0	1	1	1	37	1	0	0	1	2	6.23	318	3.84	129	35.2	0	0	IIB	0
SH20289350	2.255	1	239	1	0	0	0	0	0	0	1	8	9	10	249	2.2	0	1	0	10	17	1	0	0	0	0	14.55	215	4.14	141	39	0	0	IA	0
SH20289831	1.56	1	214	1	1	0	0	0	0	1	1	8	9	32	246	2.27	1	0	0	4	50	1	0	0	0	0	7.39	419	3.62	118	36.4	0	0	IB	0
SH20290027	1.8	0	235	1	0	0	0	0	0	0	1	6	9	7	242	1.8	0	1	1	6	21	0	0	0	0	0	4.22	226	5.07	194	56.5	0	0	IIIB	1
SH20290310	1.795	1	215	1	0	0	0	1	0	0	2	9	9	20	235	1.85	1	0	0	1	20	0	0	0	0	0	11.4	562	3.66	122	35.7	0	0	IIB	0
SH20290650	2.62	1	259	0	0	0	0	0	0	0	0	9	9	32	291	3.05	1	0	1	5	25	1	0	0	0	0	8.63	187	3.92	120	34.4	1	0	IIB	0
SH20290755	1.67	1	230	1	1	0	0	0	0	0	0	9	10	7	237	1.63	0	1	0	9	14	0	0	0	0	0	9.49	200	4.57	174	52	0	0	IIB	0
SH20291354	1.49	0	223	0	1	0	0	0	0	0	2	9	9	26	249	1.75	1	1	0	1	18	0	0	0	0	0	15.32	408	4.56	158	47.4	0	0	IIA	0
SH20291421	0.865	0	220	1	1	0	0	0	0	0	2	9	9	31	251	1.22	0	1	0	1	37	1	0	0	0	0	2.31	321	2.71	80	24.9	0	0	IIB	1
SH20292467	1.25	1	207	0	0	0	0	0	0	0	2	8	8	23	230	1.68	1	1	1	1	44	1	0	0	0	0	8.85	444	3.23	108	29.2	0	0	IIIA	1
SH20294146	2.25	1	241	0	0	0	0	1	0	0	0	9	9	8	249	2.3	1	0	0	1	31	1	0	0	0	0	11.31	340	3.99	138	37	0	0	IIIB	1
SH20296245	1.8	1	231	0	0	0	0	0	0	0	0	8	9	11	242	1.73	0	1	0	12	15	1	0	0	0	0	14.58	422	4.82	167	48.7	0	0	IIB	0
SH20297009	1.09	0	195	0	0	0	0	0	0	1	2	6	8	68	263	2.43	1	1	0	1	77	1	1	0	1	2	12.47	381	4.33	126	38.6	1	0	IIA	0
SH20297084	2.48	1	252	1	0	0	0	1	0	0	0	9	9	24	276	2.66	0	0	0	8	26	0	0	0	0	0	7.66	319	2.49	91	28.8	0	0	IIA	0
SH20297459	2.38	0	244	1	1	0	0	0	0	0	0	10	10	8	252	2.34	0	0	0	5	12	0	0	0	0	0	13.1	262	4.81	175	53.1	0	0	IIB	0
SH20298647	1.525	1	212	1	0	0	0	0	1	0	2	8	8	12	224	1.56	0	1	1	1	12	1	1	1	0	0	15.16	533	3.9	156	43.4	0	1	IIIB	1
SH20299173	1.14	1	191	0	0	0	0	0	0	0	1	8	8	24	215	1.3	1	0	1	23	79	1	1	0	0	0	15.47	524	2.44	85	25.5	0	0	IIB	1
SH20299669	1.63	0	223	1	0	0	0	0	0	1	2	7	8	33	256	2.16	0	1	0	1	25	0	0	0	0	0	13.32	301	3.53	125	36.7	1	0	IIA	0
SH20301311	1.01	0	209	1	1	0	0	0	0	1	1	7	9	44	253	1.8	1	0	1	1	35	1	1	0	0	0	2.14	257	3.4	112	34.7	0	0	IA	0
SH20303239	1.735	0	218	1	1	0	0	0	1	0	3	3	5	30	248	1.99	0	0	1	30	21	1	0	0	1	1	6.15	353	3.47	116	35.6	0	0	IB	0
SH20304041	1.27	1	208	1	0	0	0	0	0	0	2	7	8	29	237	1.51	0	0	1	6	42	1	0	0	0	0	4.17	278	2.77	91	27.4	0	0	IIIA	1
SH20304116	1.52	1	209	1	0	0	0	0	2	1	0	8	8	41	250	2.29	1	1	0	2	34	1	0	0	1	2	17.9	399	4.99	137	41.7	0	0	IB	0
SH20304325	1.16	0	211	1	1	0	0	1	0	1	1	9	9	13	224	1.23	1	1	1	1	21	1	0	0	0	0	15.64	341	4.62	171	49.2	0	0	IB	0
SH20305040	3.37	0	268	1	0	0	0	0	0	0	0	9	10	3	271	3.2	1	0	0	6	1	0	0	0	0	0	37.13	354	3.21	118	34.5	0	0	IB	0
SH20305973	3.22	0	266	1	1	0	0	0	0	0	0	9	10	8	274	2.89	1	0	0	8	14	1	0	0	0	0	31.56	399	4.29	156	44.5	0	0	IIA	0
SH20307506	1.7	0	238	1	0	0	0	0	0	0	0	10	10	12	250	1.86	0	0	0	13	11	1	0	0	0	0	12.39	334	3.32	125	37.4	0	0	IB	0
SH20311371	1.02	1	212	1	1	0	0	0	0	0	2	2	5	41	253	1.72	1	1	1	2	19	1	0	0	0	0	7.23	310	3.29	122	36.9	0	0	IB	0
SH20315303	3.3	0	270	0	0	0	0	0	0	0	0	10	10	9	279	3.2	1	1	0	10	14	0	0	0	0	0	19.79	565	3.66	136	45.2	0	0	IIB	0
SH20318424	1.53	1	237	1	1	0	0	0	0	0	0	10	10	4	241	1.39	0	1	1	2	11	1	0	0	0	0	7.44	165	4.37	173	50.8	0	0	IB	0
SH20319518	2.33	1	228	0	0	0	0	0	0	1	0	9	9	16	244	2.09	1	1	0	2	13	0	0	0	0	0	11.4	562	4.36	151	43.6	0	0	IB	0
SH20320507	0.97	0	211	1	1	0	0	0	0	1	0	7	7	47	258	1.81	1	1	1	1	38	1	0	0	1	2	10.98	555	3.81	120	37.3	0	0	IB	0
SH20321054	3.78	1	269	1	0	0	0	0	0	0	0	10	10	10	279	3.7	1	0	0	11	8	0	0	0	0	0	13.05	265	4.65	176	54.1	0	0	IB	0
SH20322069	1.458	1	212	1	1	0	0	0	1	1	1	8	9	12	224	1.41	1	1	1	12	22	1	0	0	0	0	30.75	578	4.79	155	46.3	0	0	IIB	1
SH20328246	1.88	1	242	1	1	0	0	0	0	0	0	9	10	7	249	1.88	1	0	0	8	27	0	0	0	0	0	11.7	333	4.43	157	49.1	0	0	IIB	1
SH20331723	2.355	0	255	1	0	0	0	0	0	0	1	1	9	5	260	2.23	1	1	0	5	16	1	0	0	0	0	15.88	257	3.88	138	39.5	0	0	IIIA	1
SH20339561	2.65	1	261	1	0	0	0	0	0	0	0	9	10	6	267	2.65	1	1	0	6	18	0	0	0	0	0	7.46	233	3.01	107	32.6	0	0	IIA	0
SH20339850	3.4	1	260	1	0	0	0	0	0	0	0	10	10	3	263	3.31	0	0	1	2	17	0	0	0	0	0	17.97	222	6.26	220	62.6	0	0	IB	0
SH20345194	1.9	0	241	0	0	0	0	1	0	1	0	9	9	15	256	1.92	1	1	0	15	16	0	0	0	0	0	13.41	498	3.7	145	42.9	0	0	IB	0
SH20346729	1.745	0	231	1	0	0	0	0	1	0	2	8	8	3	234	1.7	0	1	1	3	11	0	0	0	0	0	4.26	108	3.91	146	44.4	0	0	IIB	1
SH20348676	2.05	1	238	1	0	0	0	1	0	0	0	9	10	11	249	2.25	1	0	1	13	15	1	1	0	0	0	5.46	414	3.08	112	30.8	0	0	IIB	1
SH20349331	0.68	1	197	1	1	0	0	0	0	1	2	6	8	41	238	1.24	0	1	1	1	57	1	0	0	1	2	16.83	349	4.27	132	39.1	0	0	IIA	0
SH20350003	2.845	0	248	0	0	0	0	1	0	0	0	9	10	4	252	2.45	1	0	0	8	24	1	0	0	0	0	52.16	309	3.77	139	39.2	0	0	IIA	0
SH20359708	2.35	0	259	1	1	0	0	0	0	1	0	8	9	3	262	2.22	1	0	0	4	5	0	0	0	0	0	5.77	171	5.07	194	57.3	0	0	IB	0
SH20360786	1.86	1	246	1	1	0	0	0	0	1	0	10	10	9	255	1.83	1	0	1	9	23	1	0	0	0	0	18.78	172	5.59	209	60.4	0	0	IIB	0

## Sheet: NEC_sevOutcome
Sample_ID	Weight	Gender	Gestational Age	Delivery Method	Gestational Hypertension	Chorioamnionitis	Intrahepatic Cholestasis of Pregnancy	Premature Rupture of Membranes	Placental Condition	Antenatal Steroid Use	Resuscitation Needed	1-min Apgar Score	5-min Apgar Score	Age of Illness Onset	Corrected Gestational Age	Weight at NEC Onset	Full Enteral Feeding at Onset	hsPDA After Birth	Respiratory Support During Illness	Age at antibiotic use	Duration of antibiotic use	Gastrointestinal Perforation	BPD	BPD Severity	WBC Count at NEC Onset	Platelet Count at NEC Onset	RBC Count at NEC Onset	Hemoglobin Level at NEC Onset	Hematocrit at NEC Onset	Blood Transfusions in 1 Week Before NEC	Acute Kidney Injury During NEC	NEC Stage	Treatment	sevOutcome	Periventricular Leukomalacia Before NEC	Periventricular Leukomalacia After NEC	Intraventricular Hemorrhage Grade Before NEC	Intraventricular Hemorrhage Grade After NEC	Sepsis	Shock	Outcome
JX1460454	2	1	217	1	1	1	0	0	0	1	0	8	10	26	243	2.05	0	0	1	1	12	1	1	2	21.27	608	5.35	171	52.2	1	0	IIA	0	1	0	0	0	0	0	0	0
JX1470592	1.18	1	198	0	1	0	0	0	0	1	2	5	8	10	208	1.37	2	0	1	15	35	0	0	0	10.31	185	2.35	81	25	0	0	IIA	0	1	0	0	0	0	1	0	0
JX1470658	1.14	1	194	0	0	0	0	0	0	1	2	7	9	3	197	1.1	2	0	1	1	33	1	1	3	13.2	137	4.57	172	52.7	0	0	IIIB	1	1	0	0	0	0	1	0	0
JX1471676	3	1	285	0	0	1	0	0	0	0	0	10	10	1	286	2.93	1	0	0	2	14	0	0	0	6.15	280	4.74	162	45.7	0	0	IIA	0	0	0	0	0	0	0	0	0
JX1478174	2.59	1	267	0	0	0	0	0	0	0	0	9	10	11	278	2.935	1	0	0	11	10	0	0	0	11.67	380	4.45	143	41.6	1	0	IIA	0	0	0	0	0	0	0	0	0
JX1479698	2.3	1	253	1	0	1	0	0	0	1	0	8	9	2	255	2.3	2	0	0	1	16	0	0	0	8.9	125	3.23	123	34.6	0	0	IIA	0	0	0	0	0	0	0	0	0
JX1480569	2.9	1	266	0	0	0	0	0	0	0	0	9	10	1	267	2.74	2	0	0	1	4	0	0	0	10	254	4.4	157	45.1	0	0	IIB	0	0	0	0	0	0	0	0	0
JX1483248	2.1	0	250	1	0	0	0	0	0	1	0	9	10	14	264	2.38	1	0	0	21	23	0	0	0	17.1	558	3.69	136	39.4	0	0	IIA	0	0	0	0	0	0	0	0	0
JX1483287	3	1	260	1	1	0	0	0	0	0	0	9	10	4	264	2.845	1	0	1	6	33	1	0	0	4.13	192	5.37	167	50.5	0	1	IIIB	1	1	0	0	0	0	1	1	0
JX1483716	3.53	1	280	1	0	0	0	0	0	0	0	9	10	3	283	3.85	1	0	0	3	11	1	0	0	2.05	135	4.07	138	40.6	0	0	IIIB	1	1	0	0	0	0	1	0	0
JX1486507	3.55	1	277	0	1	0	0	0	0	0	0	9	10	1	278	3.17	2	0	0	1	15	0	0	0	5.99	275	4.11	143	41.4	0	0	IIA	1	0	0	0	0	0	0	0	0
JX1491908	3.5	1	280	0	0	1	0	0	0	0	0	9	10	2	282	3.29	1	0	0	3	16	0	0	0	7.23	215	3.3	115	32.9	0	0	IIB	0	0	0	0	0	0	0	0	0
JX1492322	2.75	0	250	1	0	0	0	0	0	1	0	8	9	5	255	2.4	1	0	0	6	6	0	0	0	12.47	297	5.41	187	56.3	0	0	IIA	0	0	0	0	0	0	0	0	0
JX1492547	2.8	1	258	0	0	1	0	0	0	0	0	5	7	1	259	2.56	0	0	1	1	15	0	0	0	13.2	238	4.27	146	43.9	0	0	IIA	0	1	0	0	0	0	1	1	0
JX1497574	2.4	0	238	0	0	0	0	0	0	1	0	8	10	19	257	2.71	1	0	0	19	6	0	0	0	12.18	343	4.49	155	46.2	0	0	IIA	0	0	0	0	0	0	0	0	0
JX1498084	2.55	0	256	1	0	0	0	0	0	0	0	8	10	6	262	2.5	1	0	0	7	10	0	0	0	9.18	259	3.41	117	34.6	0	0	IIA	0	0	0	0	0	0	0	0	0
JX1498913	2.3	0	261	0	0	0	0	0	0	0	0	10	10	8	269	2.32	1	0	0	10	15	0	0	0	10.9	599	4.77	166	48.9	0	0	IIA	0	0	0	0	0	0	0	0	0
JX1501753	1.2	1	209	0	0	0	0	1	0	1	0	8	10	1	210	1.19	2	0	1	1	37	1	0	0	6.62	123	4.19	154	44.8	0	0	IIIB	1	1	0	0	1	0	1	0	0
JX1504214	1.325	0	211	0	0	1	0	0	1	1	0	9	9	22	233	1.35	1	1	1	1	20	1	1	1	22.12	499	3.5	121	36.8	0	0	IB	0	1	0	0	0	0	1	0	0
JX1505504	3.35	1	273	1	0	0	0	0	0	0	0	10	10	2	275	3.24	1	0	0	2	14	0	0	0	12.14	268	3.7	137	37.6	0	0	IIIA	1	0	0	0	0	0	0	0	0
JX1515310	3.65	1	281	0	0	0	0	0	0	0	0	10	10	1	282	3.52	1	0	0	1	13	0	0	0	16.38	239	4.79	167	48.7	0	0	IIA	0	0	0	0	0	0	0	0	0
JX1518983	2.475	1	259	1	0	0	0	0	0	0	0	9	10	3	262	2.36	1	0	1	3	8	0	0	0	5.97	118	4.58	156	52.2	0	0	IIA	0	0	0	0	0	0	0	0	0
JX1520887	3.6	1	271	0	0	0	0	0	0	0	0	9	10	14	285	3.52	1	0	0	15	12	0	0	0	15.17	702	3.74	126	36.2	0	0	IIA	0	0	0	0	0	0	0	0	0
JX1524841	3.05	1	264	1	0	0	0	0	0	0	0	7	9	6	270	2.99	1	0	1	6	8	0	0	0	5.4	240	4.49	163	46.3	0	0	IIIA	1	1	0	0	0	0	1	1	0
JX1541212	2	0	234	1	0	0	0	0	0	1	1	6	8	1	235	2	0	0	1	1	15	0	0	0	16.01	312	4.68	151	44.8	0	0	IB	0	0	0	0	0	0	0	0	0
JX1542843	3.1	0	264	0	0	0	0	0	0	0	0	10	10	11	275	2.83	0	0	0	2	8	0	0	0	11.74	281	5.37	189	55.2	0	0	IIA	0	0	0	0	0	0	0	0	0
JX1543748	1.34	0	240	1	0	1	0	0	0	0	1	8	7	2	242	1.235	0	1	1	1	16	0	1	3	3.75	116	3.81	153	41.2	0	0	IIB	1	1	0	0	0	0	1	0	1
JX1544216	3.5	1	280	0	0	0	0	0	0	0	0	10	10	7	287	3.52	1	0	0	7	3	0	0	0	9.32	111	5.08	176	52.8	0	0	IIA	0	0	0	0	0	0	0	0	0
JX1547316	3.1	0	285	0	0	0	0	0	0	0	0	10	10	25	310	3.8	1	0	0	26	10	0	0	0	9.12	454	4.18	141	41.4	0	0	IIA	0	0	0	0	0	0	0	0	0
JX1549292	3	1	254	1	0	1	0	1	0	0	1	8	10	5	259	2.94	0	0	1	5	10	0	0	0	20.33	327	4.74	149	45.2	0	0	IIA	0	0	0	0	0	0	0	0	0
JX1549340	3.9	1	271	1	0	0	0	0	0	1	1	5	7	28	299	4.38	1	0	0	26	10	0	0	0	8.31	225	4.09	132	40.5	0	0	IA	0	0	0	0	0	0	0	0	0
JX1550392	2.75	0	266	1	0	0	0	0	0	0	0	10	10	18	284	2.82	1	0	0	18	8	0	0	0	14.35	597	4.17	140	40.6	0	0	IA	0	0	0	0	0	0	0	0	0
JX1556735	1.4	0	203	1	0	0	0	0	0	0	0	10	10	1	204	1.4	0	0	1	1	2	0	1	3	12.9	439	4.99	160	50.1	0	0	IIA	0	1	0	0	0	0	0	0	0
JX1558836	2.15	0	230	0	0	0	0	0	0	1	0	10	10	5	235	2.3	0	0	1	6	4	0	1	1	17.87	252	4.48	162	45.7	1	0	IIA	0	1	0	0	0	0	0	0	1
JX1569620	3.3	0	272	1	1	0	0	0	0	0	0	10	10	3	275	3.28	0	0	0	4	8	0	0	0	8.9	310	4.51	150	45.6	0	0	IIA	0	0	0	0	0	0	0	0	0
JX1569810	3.25	1	268	1	0	0	0	0	0	0	0	10	10	3	271	3.14	0	0	0	3	11	0	0	0	8.6	314	4.79	179	50.2	0	0	IIA	0	0	0	0	0	0	0	0	0
JX1577350	2.9	1	273	0	0	0	0	0	0	0	0	10	10	1	274	2.72	0	0	0	2	6	0	0	0	9.5	277	6	188	57.2	0	0	IIA	0	0	0	0	0	0	0	0	0
JX1577370	3.8	1	278	0	0	0	0	0	0	0	0	10	10	2	280	3.84	1	0	0	7	5	0	0	0	4	209	5.36	183	52.5	0	0	IIB	1	1	0	0	0	0	1	0	1
JX1578521	0.85	1	188	1	0	1	0	0	0	0	1	0	5	5	193	0.89	0	1	1	6	16	1	1	1	7.14	24	4.46	147	44.3	0	0	IIB	0	1	0	0	0	1	0	0	0
JX1581741	1.13	1	189	0	0	0	0	0	0	1	1	6	8	6	195	1	0	0	1	1	35	1	1	3	60.22	216	3.58	113	33.5	0	0	IIIA	1	1	0	0	0	0	1	1	0
JX1582461	3.45	0	259	1	0	0	0	0	0	0	0	10	10	22	281	4.3	1	0	0	23	3	0	0	0	11.48	395	4.92	165	49.7	0	0	IIA	0	0	0	0	0	0	0	0	0
JX1585093	3.15	1	266	0	0	0	0	0	0	0	0	10	10	2	268	3.1	0	0	0	2	10	0	0	0	10.32	150	5.37	192	54.4	0	0	IIB	0	0	0	0	0	0	0	0	0
JX1585185	1.33	1	217	1	0	0	0	0	1	1	1	3	6	1	218	1.24	0	0	1	2	10	0	1	3	5.35	202	3.49	129	40	0	0	IIA	0	1	0	0	0	0	0	0	0
JX1587798	3.5	1	284	0	0	0	0	0	0	0	0	10	10	1	285	3.37	0	0	0	1	8	0	0	0	14.01	319	4.4	157	46.4	0	0	IIA	0	0	0	0	0	0	0	0	0
JX1588742	3.45	1	289	0	0	0	0	0	0	0	0	10	10	1	290	3.33	0	0	0	1	18	0	0	0	12.03	211	5.24	183	55	0	0	IIB	0	0	0	0	0	0	0	0	0
JX1592756	2.11	0	238	1	0	0	0	0	0	0	0	10	10	1	239	2	0	0	0	2	16	0	0	0	6.96	224	3.36	132	39.7	0	0	IIA	0	1	0	0	0	1	0	0	0
JX1593031	2.41	0	238	1	0	0	0	0	0	0	0	9	10	1	239	2.36	0	0	0	4	14	0	0	0	9.49	288	3.86	152	43.2	0	0	IIA	0	1	0	0	0	1	0	0	0
JX1593682	1.34	1	228	1	1	0	0	0	0	1	0	7	9	3	231	1.39	0	0	1	1	16	0	1	3	17.6	232	3.4	139	39.6	0	0	IIIA	1	1	0	0	0	0	1	1	1
JX1594367	2.5	0	264	0	0	0	0	0	0	0	0	10	10	9	273	2.38	1	0	0	11	8	0	0	0	9.61	446	4.57	161	45.8	0	0	IIA	0	0	0	0	0	0	0	0	0
JX1595405	1.833	0	219	0	0	0	0	0	0	0	0	10	10	1	220	1.8	1	0	1	4	22	0	1	3	11.82	181	3.44	118	33.8	0	0	IIA	0	1	0	0	0	1	0	0	0
NMG537400	1.73	0	218	1	0	0	0	1	0	1	0	9	9	3	221	1.7	0	0	1	1	29	0	0	0	15.56	231	4.44	177	51	0	0	IIA	0	1	0	0	1	0	1	0	0
NMG539348	1.66	1	217	0	0	0	0	1	0	1	0	9	9	1	218	1.66	0	0	1	1	41	0	1	1	10.86	295	4.68	173	49.4	0	0	IB	0	1	0	0	1	1	0	0	0
NMG539627	3.47	1	260	0	0	0	0	0	0	0	0	9	9	6	266	3.27	1	0	1	1	9	0	0	0	16.3	436	4.72	163	47.6	0	0	IIA	0	0	0	0	0	0	0	0	0
NMG540126	1.35	1	223	1	1	0	0	0	0	1	2	7	9	13	236	1.39	0	1	1	1	46	0	0	0	4.15	153	2.72	109	31.9	0	0	IIA	0	0	0	0	0	0	0	0	0
NMG541155	0.9	0	195	0	0	0	0	0	0	1	2	5	9	3	198	0.9	0	0	1	1	82	0	0	0	14.87	88	2.63	108	31	1	0	IB	0	1	0	0	1	1	1	0	0
NMG541270	2.64	0	242	1	0	0	0	0	1	0	2	4	8	2	244	2.62	0	1	1	1	35	0	0	0	6.29	125	4.48	172	48.7	0	0	IIA	0	0	0	0	0	0	0	0	0
NMG542048	1.28	0	200	0	1	0	0	0	0	0	0	9	9	11	211	1.2	0	1	1	1	21	0	0	0	22.03	269	3.34	115	35.7	0	0	IIA	0	0	0	0	0	0	0	0	0
NMG542861	1.15	1	213	1	1	0	0	0	0	0	0	9	9	13	226	1.14	0	1	1	1	31	0	0	0	20.32	63	3.17	133	37.9	0	0	IA	0	1	0	0	0	0	1	0	0
NMG545202	1.26	0	209	0	0	0	0	1	0	0	0	9	9	18	227	1.44	1	1	1	1	44	0	1	2	27.17	147	2.49	90	24.6	1	0	IIA	0	1	0	0	0	0	1	1	0
NMG546135	1.35	0	224	0	1	0	0	0	0	1	0	9	9	6	230	1.3	0	0	1	1	10	0	0	0	13.06	175	5.06	194	56.7	0	1	IIA	0	0	0	0	0	0	0	0	0
NMG546215	2.72	1	249	1	0	0	0	0	0	0	0	9	9	3	252	2.63	0	0	1	2	10	0	0	0	13.26	250	5.98	209	60.8	0	0	IIA	0	1	0	0	0	1	0	0	0
NMG546262	1.27	1	218	1	1	0	0	0	0	0	0	8	9	2	220	1.25	0	0	1	2	24	0	0	0	9.46	196	5.07	205	61.5	0	0	IB	0	0	0	0	0	0	0	0	0
NMG546262002	1.27	1	218	1	1	0	0	0	0	0	0	8	9	3	221	1.2	0	0	1	2	9	0	0	0	9.46	196	5.07	205	61.5	0	0	IA	0	0	0	0	0	0	0	0	0
NMG547729	2	1	222	1	1	0	0	0	0	1	0	8	9	5	227	1.92	0	1	1	2	24	0	0	0	6.31	211	4.12	164	48.1	0	0	IB	0	1	0	0	0	1	0	0	0
NMG550795	0.8	0	188	0	0	0	0	0	0	0	2	8	9	45	233	1.33	1	1	1	1	41	1	1	2	24.67	145	3.34	95	30.6	0	0	IIA	0	1	0	0	0	0	0	1	1
NMG551612	2.42	1	270	1	1	0	0	0	0	0	0	9	9	3	273	2.4	0	0	1	2	8	0	0	0	8.54	219	4.93	190	53.5	0	0	IIA	0	0	0	0	0	0	0	0	0
NMG553156	2.16	0	241	1	0	0	0	0	2	0	1	9	5	11	252	2.07	1	0	1	3	31	0	0	0	20.81	46	4.28	143	41.7	0	0	IIA	0	0	0	0	0	0	0	0	0
NMG553505	0.97	1	198	1	1	0	0	0	0	0	0	9	9	30	228	1.17	0	1	1	1	48	0	0	0	7.78	324	2.78	99	29.8	0	0	IA	0	0	0	0	0	0	0	0	0
NMG553723	1.63	0	229	0	0	0	0	1	0	1	0	9	9	15	244	1.83	0	0	1	1	17	0	0	0	7.76	349	3.8	136	38.8	0	0	IIB	0	0	0	0	0	0	0	0	0
NMG554058	0.98	0	195	1	0	0	0	1	0	0	2	7	8	15	210	1.13	0	0	1	1	15	0	0	0	7.39	145	3.36	140	41.8	0	0	IB	0	1	0	0	0	0	1	1	1
NMG554791	1.55	1	233	1	1	0	0	0	0	0	0	9	9	18	251	1.69	0	0	1	3	58	0	0	0	7.4	400	3.56	129	38.2	0	0	IIA	0	0	0	0	0	0	0	0	0
NMG555144	1.66	0	227	1	0	0	0	0	1	0	0	9	9	5	232	1.61	0	0	1	1	23	0	0	0	8.7	353	4.23	152	44.6	0	0	IA	0	0	0	0	0	0	0	0	0
NMG555497	1.1	1	210	0	0	0	0	0	0	0	0	9	9	50	260	1.93	1	0	1	1	37	0	1	2	6.49	410	3.56	107	33.2	1	0	IIA	0	1	0	0	0	0	0	0	0
NMG556282	2.82	0	283	0	0	0	0	0	0	0	0	9	9	15	298	2.84	1	0	1	1	24	0	0	0	8.99	619	2.48	86	25.7	0	0	IIA	0	1	0	0	1	1	0	0	0
NMG556410	1.21	1	227	1	1	0	0	0	0	0	0	9	9	11	238	1.21	0	0	1	1	19	0	0	0	7.81	257	4.75	181	54.2	0	0	IB	0	1	0	0	1	1	0	0	1
NMG556626	1.24	0	203	0	0	0	0	0	0	0	0	9	9	21	224	1.43	0	1	1	1	49	0	0	0	5.12	202	2.91	102	29.1	0	0	IA	0	0	0	0	0	0	0	0	0
NMG557546	1.24	1	212	0	0	0	0	1	0	1	0	9	9	11	223	1.25	0	1	1	1	40	0	0	0	15.17	253	3.78	133	39.2	0	0	IB	0	0	0	0	0	0	0	0	0
NMG557705	1.63	0	247	0	0	0	0	1	0	1	0	9	9	2	249	2.4	0	0	1	3	5	0	0	0	12.41	285	4.93	172	50.6	0	0	IA	0	0	0	0	0	0	0	0	0
NMG557880	3.35	1	282	0	0	0	0	0	0	0	1	6	9	6	288	3.28	1	0	1	6	9	0	0	0	6.52	260	4.11	149	43	0	0	IA	0	0	0	0	0	0	0	0	0
NMG559320	1.49	1	237	1	1	0	0	0	0	1	0	9	9	4	241	1.44	0	0	1	1	28	0	0	0	3.98	178	6.2	210	58.8	0	0	IIA	0	0	0	0	0	0	0	0	0
NMG560191	1.36	0	220	0	0	0	0	1	0	0	0	9	9	14	234	1.36	0	0	1	1	16	0	0	0	23.15	692	5.43	199	58.5	0	0	IB	0	0	0	0	0	0	0	0	0
NMG560660	0.97	1	214	1	1	0	0	0	0	0	0	9	9	40	254	1.42	0	1	1	4	43	0	0	0	3.49	148	3.11	104	31	1	0	IIA	0	0	0	0	0	0	0	0	0
NMG562178	1.78	1	222	1	1	0	0	1	0	0	0	9	9	3	225	1.75	0	1	1	2	20	0	0	0	5.41	210	3.64	137	39.3	0	0	IB	0	1	0	0	1	0	0	0	0
NMG562493	0.99	0	211	1	1	0	0	0	0	0	0	9	9	38	249	1.56	0	1	1	1	28	0	0	0	8.65	352	3.05	99	30.6	0	0	IA	0	1	1	1	1	1	0	1	0
NMG563309	1.39	0	238	1	1	0	0	0	0	0	0	9	9	4	242	1.39	0	1	1	1	7	0	0	0	4.92	124	7.59	271	79.5	0	0	IB	0	0	0	0	0	0	0	0	0
NMG563450	2.5	1	239	1	0	0	0	0	2	0	0	9	9	12	251	2.37	1	0	1	12	9	0	0	0	6.52	382	3.71	126	37.4	0	0	IB	0	0	0	0	0	0	0	0	0
NMG564664	1.61	0	232	1	0	0	0	1	0	0	0	9	9	8	240	1.62	0	1	1	1	17	0	0	0	11.18	252	4.53	163	48	0	0	IA	0	0	0	0	0	0	0	0	0
NMG564868	1.23	0	203	1	0	0	0	1	0	1	1	8	9	13	216	1.36	0	0	1	1	29	0	1	2	12.5	550	3.86	134	41	0	0	IIA	0	1	0	0	0	0	1	0	0
NMG565554	0.8	1	204	1	0	0	0	0	0	1	2	3	5	5	209	0.78	0	1	1	1	50	0	1	2	4.63	90	5.76	234	67.2	0	0	IA	0	1	0	0	0	0	1	0	0
NMG568003	1.03	0	206	1	0	0	0	0	0	0	0	9	9	13	219	1.07	0	1	1	3	43	0	0	0	5.75	216	3.7	139	42.5	0	0	IB	0	0	0	0	0	0	0	0	0
NMG570882	1.11	1	194	0	0	0	0	0	0	0	0	8	9	45	239	1.6	0	1	1	1	42	0	1	1	9.84	366	3.3	93	28.1	0	0	IA	0	1	0	0	0	0	1	0	0
NMG571390	0.94	0	212	1	1	0	0	0	0	0	2	5	8	25	237	1.04	0	1	1	1	43	0	0	0	6.56	268	2.55	86	25.7	0	0	IB	0	0	0	0	0	0	0	0	0
NMG571457	1.3	1	214	1	1	0	0	0	0	0	1	9	9	2	216	1.27	0	1	1	1	35	0	0	0	6.19	140	4.83	173	50.4	0	0	IIB	0	1	0	0	0	0	1	1	0
NMG572117	1.49	1	223	1	1	0	1	0	0	0	0	9	9	18	241	1.55	0	0	1	1	35	0	0	0	15.61	287	4.69	171	50.3	0	0	IA	0	0	0	0	0	0	0	0	0
NMG572574	1.83	1	253	1	1	0	0	0	0	0	0	9	9	6	259	1.82	0	1	1	5	15	0	0	0	12.69	142	4.01	159	54	0	0	IIA	0	0	0	0	0	0	0	0	0
NMG572779	2	1	229	1	0	0	0	1	0	0	1	7	9	14	243	1.91	0	0	1	1	20	0	0	0	12.71	354	3.99	133	41.4	1	0	IB	0	1	0	0	1	0	0	0	0
NMG574346	1.55	0	217	1	0	1	0	1	0	0	0	9	9	20	237	1.97	1	1	1	1	22	0	0	0	10.16	414	2.87	98	30.1	1	0	IIA	0	0	0	0	0	0	0	0	0
NMG575641	1.15	0	207	1	0	0	0	0	0	0	0	8	9	22	229	1.25	0	1	1	1	37	0	0	0	10.94	498	2.69	91	26.4	1	0	IB	0	0	0	0	0	0	0	0	0
NMG577198	1.33	1	222	1	0	0	0	1	0	0	0	9	9	13	235	1.36	0	0	1	2	14	0	0	0	12.84	401	3.54	129	38.2	0	0	IA	0	0	0	0	0	0	0	0	0
NMG577199	1.4	1	222	1	0	0	0	1	0	0	3	6	7	18	240	1.51	0	0	1	2	20	0	0	0	16.62	438	4.36	149	45.2	0	0	IA	0	0	0	0	0	0	0	0	0
NMG578388	1.48	0	238	1	1	0	0	0	0	0	0	9	9	4	242	1.3	0	0	1	3	11	0	0	0	6.48	180	5.48	201	61.4	0	0	IA	0	0	0	0	0	0	0	0	0
NMG579698	1.25	1	214	1	1	0	0	0	0	0	1	5	8	10	224	1.22	0	1	1	1	21	0	0	0	11.36	411	3.29	133	38.4	0	0	IIB	0	0	0	0	0	0	0	0	0
NMG580526	1.44	0	209	0	0	0	0	1	0	0	0	9	9	8	217	1.4	0	0	1	3	20	0	0	0	28.33	311	4.37	141	44.3	1	0	IB	1	0	0	0	0	0	0	0	0
NMG585054	1.76	1	229	0	0	0	0	0	0	0	0	8	9	8	237	1.74	0	1	1	2	19	0	0	0	7.63	442	4.71	168	48.4	0	0	IA	0	0	0	0	0	0	0	0	0
NMG585713	1	0	212	0	0	0	0	1	0	0	1	5	9	25	237	1.19	1	0	1	1	19	0	0	0	7.55	325	3.62	121	35.8	1	0	IB	0	0	0	0	0	0	0	0	0
NMG585903	1.5	1	222	1	1	0	0	0	0	0	0	9	9	2	224	1.48	0	0	1	1	22	0	0	0	8.38	212	5.11	200	58.7	0	0	IA	0	0	0	0	0	0	0	0	0
NMG588291	1.2	1	227	1	1	0	0	0	1	0	1	7	9	27	254	1.55	1	1	1	2	24	0	0	0	7.22	177	2.81	95	29.2	0	0	IA	0	1	0	0	0	0	1	0	0
NMG588537	0.99	1	226	1	1	0	1	0	0	0	0	9	9	14	240	1.08	0	1	1	1	28	0	1	1	8.12	332	2.86	111	34.2	0	0	IA	0	1	0	0	0	0	1	0	0
NMG588663	1.24	1	225	1	1	1	0	0	0	0	2	9	9	3	228	1.22	0	1	1	1	53	0	0	0	9.27	126	5.12	212	61	0	0	IB	0	1	0	0	0	0	0	0	1
NMG588984	1.17	0	207	0	0	0	0	1	0	0	1	8	9	15	222	1.15	0	0	1	1	21	0	1	2	19.02	208	4.08	152	44.1	0	0	IIB	0	1	0	0	0	0	1	0	0
NMG589283	1.64	1	238	1	0	0	0	0	0	0	0	9	9	3	241	1.63	0	0	1	1	11	0	0	0	11.33	147	4.49	178	52.7	0	0	IA	0	1	0	0	1	0	0	0	0
NMG589690	1.1	0	208	1	0	0	0	0	0	0	2	5	8	20	228	1.33	0	1	1	1	18	0	0	0	10	144	3.13	113	34.1	0	0	IA	0	0	0	0	0	0	0	0	0
NMG590383	1.59	0	229	1	0	0	0	1	0	1	0	9	9	4	233	1.59	0	1	1	4	8	0	0	0	9.82	316	4.42	169	49.3	0	0	IIA	0	0	0	0	0	0	0	0	0
NMG590892	0.8	0	196	0	0	0	0	1	0	0	0	9	9	41	237	1.67	0	1	1	1	27	0	1	1	3.81	259	3.95	127	39.2	1	0	IB	0	1	0	0	0	0	0	0	0
NMG591875	1.78	1	222	0	0	0	0	0	0	0	0	8	8	27	249	2.2	0	0	1	1	31	0	1	2	11.29	183	2.6	84	24.6	0	0	IA	0	1	0	0	0	0	1	1	0
NMG593796	1.26	1	216	1	1	0	0	0	1	1	0	9	9	9	225	1.27	0	1	1	1	14	0	1	1	7.76	217	3.92	150	44.2	0	0	IB	0	1	0	0	0	0	0	0	0
NMG594127	1.2	1	205	0	0	0	0	1	0	0	0	8	8	23	228	1.57	0	0	1	1	15	0	0	0	3.83	366	2.3	86	25.6	0	0	IIA	0	0	0	0	0	0	0	0	0
NMG594249	1.6	0	218	0	0	0	0	1	0	0	0	9	9	22	240	1.76	1	0	1	1	16	0	0	0	11.57	589	3.37	118	35.6	0	0	IB	0	0	0	0	0	0	0	0	0
NMG595074	1.26	1	212	0	0	0	0	1	0	0	1	8	9	33	245	1.79	0	1	1	1	22	0	0	0	6.41	214	2.27	77	23.1	1	0	IIA	0	0	0	0	0	0	0	0	0
NMG595868	1.68	1	219	0	0	0	0	0	0	0	0	9	9	14	233	1.68	0	1	1	2	39	0	1	1	8.21	465	4.02	139	40.1	0	0	IA	0	1	0	0	0	0	0	0	0
NMG596201	1.97	0	242	1	0	0	0	1	0	0	0	9	9	10	252	2.08	0	0	1	1	24	0	0	0	3.2	318	4.04	139	43.5	0	0	IIB	0	0	0	0	0	0	0	0	0
NMG598221	1.65	1	224	1	0	0	0	1	0	0	0	9	9	9	233	1.6	0	1	1	1	13	0	0	0	11.91	334	4.8	169	49.5	0	0	IIA	0	0	0	0	0	0	0	0	0
NMG601321	2.21	0	256	1	0	0	0	0	0	0	0	9	9	10	266	2.08	0	1	1	2	26	1	0	0	6.29	371	4.23	163	48.7	0	0	IIB	1	0	0	0	0	0	0	0	0
NMG603080	1.2	1	203	1	1	0	0	0	0	0	0	9	9	41	244	1.84	1	1	1	2	21	0	1	2	8.46	438	2.49	80	24.3	0	0	IIA	0	1	0	0	0	0	0	0	0
NMG604648	0.85	1	194	1	1	0	0	0	0	0	0	8	9	11	205	0.85	0	1	1	2	28	0	0	0	16.84	353	3.9	152	42.9	0	0	IIA	0	1	0	0	0	0	1	0	0
NMG604737	2	1	231	0	0	0	0	0	0	0	0	9	9	10	241	1.87	1	0	1	9	8	0	0	0	12.49	534	3.19	117	34.9	0	0	IB	0	0	0	0	0	0	0	0	0
NMG605311	0.88	0	190	0	0	0	0	1	0	0	1	7	9	18	208	0.9	0	1	1	1	27	0	0	0	12.87	284	3.04	108	32.3	0	0	IB	0	1	0	0	1	1	1	0	0
NMG606724	1.32	1	203	1	1	0	0	0	0	1	0	9	9	45	248	1.78	0	1	1	1	14	0	0	0	7.82	285	3.59	111	31.6	1	0	IIA	0	0	0	0	0	0	0	0	0
NMG607443	2.09	1	235	0	0	0	0	0	0	0	0	9	9	9	244	1.96	1	1	1	8	13	0	0	0	11.49	402	3.81	145	42.4	0	0	IIA	0	0	0	0	0	0	0	0	0
NMG607905	2.14	1	250	1	1	0	0	0	0	0	0	9	9	3	253	2.21	0	0	1	13	7	0	0	0	10.16	378	4.05	136	40.1	0	0	IIA	0	0	0	0	0	0	0	0	0
QZ510576	1.5	1	248	1	0	0	0	1	0	0	0	10	10	16	264	1.75	1	0	0	16	7	0	0	0	10.4	304	3.83	134	38.5	0	0	IIA	0	1	0	0	1	1	0	0	0
QZ512896	2.4	1	242	1	0	0	0	1	0	0	0	9	10	13	255	2.5	0	1	0	13	7	0	0	0	10.8	524	3.7	130	36.7	0	0	IA	0	0	0	0	0	0	0	0	0
QZ513255	1.09	1	186	0	0	0	0	1	0	1	1	5	7	6	192	1.02	0	0	1	1	31	0	1	3	27.34	236	4.26	167	48.2	0	0	IIB	0	1	0	0	0	1	0	0	0
QZ513303	1.1	0	200	0	0	0	0	0	0	1	0	8	9	11	211	1.05	0	1	1	1	19	0	0	0	8.3	219	3.14	110	32.1	0	0	IIB	0	1	0	0	1	1	1	0	0
QZ513519	1.3	1	214	1	0	0	0	1	0	1	0	8	9	9	223	1.25	0	1	1	9	6	0	0	0	10.7	191	3.89	142	40.6	0	0	IIA	0	0	0	0	0	0	0	0	0
QZ514728	2.45	0	267	0	0	0	0	0	0	0	0	10	10	5	272	2.31	0	0	0	5	16	0	0	0	11.1	100	4.57	173	51.1	0	0	IIA	0	1	0	0	0	1	0	0	0
QZ514823	1.465	0	216	1	1	0	0	0	0	1	0	8	9	15	231	1.63	0	0	0	1	19	0	0	0	9.2	334	3.94	142	42.6	0	0	IIA	0	1	0	0	0	1	0	0	0
QZ514895	1	0	202	1	0	0	0	0	0	1	0	10	10	36	238	1.67	1	0	1	1	32	0	0	0	3.5	327	2.92	96	28.9	0	0	IA	0	1	0	0	1	0	1	1	0
QZ517068	1.55	0	205	1	0	0	0	0	0	0	1	8	9	10	215	1.6	1	1	1	1	24	0	0	0	9.7	468	4.25	145	44.2	0	0	IIB	0	1	0	0	1	1	0	0	0
QZ517461	0.8	0	192	0	0	0	0	1	0	1	0	8	10	32	224	1.22	1	0	1	1	37	0	1	3	6.7	265	3.4	108	31.5	1	0	IIB	0	1	0	0	1	1	1	0	0
QZ518430	0.6	1	171	0	0	0	0	0	2	1	2	5	8	15	186	0.59	0	1	1	1	22	0	0	0	18.7	321	2.83	105	31.2	0	0	IIB	0	1	0	1	1	1	1	0	0
QZ519391	0.8	1	211	1	1	0	0	0	0	1	2	8	8	20	231	1.08	0	1	1	1	35	0	1	3	10.3	92	2.29	76	23.4	0	0	IIB	0	1	0	0	0	0	1	0	0
QZ520955	1.55	1	214	1	0	0	0	0	0	1	0	8	9	25	239	1.88	1	0	1	1	22	0	0	0	3	396	4.19	125	38.2	0	0	IIIA	1	1	0	0	1	1	0	0	0
QZ521634	1.7	1	215	1	0	0	0	0	1	1	2	6	9	13	228	1.8	0	1	1	2	16	0	1	3	9.4	286	2.89	96	29.1	0	0	IA	0	1	0	0	1	1	0	0	0
QZ523275	1.65	0	253	1	0	0	0	0	0	0	1	5	8	5	258	1.65	0	1	1	1	25	0	0	0	7.4	188	3.82	146	42.8	0	0	IIB	1	1	0	0	0	0	1	0	0
QZ526852	0.99	1	183	0	0	0	0	1	0	1	0	8	8	42	225	1.5	1	1	1	1	60	0	1	3	5.7	489	2.53	88	27.1	0	0	IA	0	1	0	0	1	1	0	0	0
QZ529969	1.22	0	202	1	0	0	0	0	1	1	3	2	8	1	203	1.22	0	1	1	1	29	0	0	0	14.1	101	3.78	140	41.2	0	0	IIB	0	1	0	0	1	1	0	0	0
QZ530167	1.15	0	211	0	0	0	0	0	0	0	0	8	9	13	224	1.21	0	1	1	1	17	0	0	0	7.3	233	3.42	126	37.1	0	0	IA	0	1	0	0	1	0	0	0	0
QZ531205	1.67	1	213	0	0	0	0	1	0	1	0	10	10	15	228	1.9	0	1	1	1	18	0	0	0	7.8	323	4.33	150	43.1	0	0	IA	0	1	0	0	1	0	0	0	0
QZ532990	1.85	0	240	1	0	0	0	0	0	1	0	8	9	7	247	1.89	0	0	1	7	8	0	0	0	15.4	430	4.04	142	42.2	0	0	IIA	0	0	0	0	0	0	0	0	0
QZ536864	2.9	0	280	1	0	0	0	0	0	0	0	10	10	4	284	2.9	0	0	0	4	11	0	0	0	16.4	209	4.82	162	47.3	0	0	IA	0	1	0	0	1	0	0	0	0
QZ538024	1.6	0	244	1	1	0	0	0	0	0	1	7	10	12	256	1.69	0	0	0	12	6	0	0	0	13	283	4.29	149	43.2	0	0	IIA	0	1	0	0	1	1	0	0	0
QZ548528	1.6	0	221	0	0	0	0	0	0	0	1	6	8	9	230	1.58	0	1	1	9	8	0	0	0	18.3	314	4.12	145	42.4	0	0	IB	0	1	0	0	1	0	1	0	0
QZ551354	0.92	1	197	1	0	0	0	1	0	1	2	8	8	19	216	1.1	1	1	1	1	52	0	0	0	11.7	334	3.21	101	30.7	0	0	IIB	1	1	0	0	1	1	0	1	0
QZ554021	1.4	1	201	0	0	0	0	0	0	1	0	9	9	14	215	1.43	1	0	1	13	18	0	0	0	4.6	541	3.11	91	28.5	0	0	IIA	1	0	0	0	0	0	0	0	0
QZ555204	0.58	1	166	0	0	0	0	0	0	1	1	6	9	81	247	1.6	1	1	1	1	121	1	1	3	3.6	50	3.27	95	29.8	1	0	IIIB	1	1	0	0	1	0	0	0	0
QZ555977	1.19	0	218	1	0	0	1	1	0	1	2	8	9	40	258	1.94	1	1	1	43	58	1	1	1	5	424	3.14	96	30.4	0	0	IIIB	1	1	0	0	0	0	0	0	0
QZ556395	1.8	1	245	1	0	0	0	0	0	1	0	8	9	14	259	2.03	1	0	0	13	14	0	0	0	3.9	142	3.37	113	35.7	0	0	IB	0	1	0	0	0	0	1	0	0
QZ556754	2.3	1	265	1	0	0	0	0	0	1	1	7	10	7	272	2.33	2	0	0	6	41	0	0	0	8.9	262	2.67	95	28.3	0	0	IIA	0	0	0	0	0	0	0	0	0
QZ558157	1.4	1	234	1	0	0	0	1	0	1	1	6	8	24	258	1.83	0	0	0	1	8	0	0	0	16.7	371	3.39	117	33.8	0	0	IIA	0	0	0	0	0	0	0	0	0
QZ559520	1.43	0	210	1	0	0	0	0	2	1	2	5	8	4	214	1.35	0	0	1	1	11	1	0	0	7.9	209	4.24	152	46.5	0	0	IIIB	1	0	0	0	0	0	0	0	0
QZ560330	1.47	1	209	1	0	0	0	1	0	1	0	8	9	22	231	1.9	0	0	1	1	28	0	0	0	8	217	3.38	119	35.6	0	0	IIB	0	1	0	0	0	0	1	0	0
QZ561287	1.15	0	228	1	1	0	0	0	0	1	0	8	9	17	245	1.46	0	0	1	16	17	0	0	0	4.5	207	3.64	136	41.2	0	0	IIA	0	1	0	0	0	0	1	0	0
QZ561487	2.4	1	237	1	0	0	0	1	0	1	0	8	9	11	248	2.41	0	0	0	1	16	0	0	0	33	291	3.9	140	41.6	0	0	IIA	0	0	0	0	0	0	0	0	0
QZ563126	1.185	1	197	1	0	0	0	1	0	1	0	8	9	17	214	1.18	0	1	1	1	23	0	1	3	4	277	2.64	100	28.1	0	0	IB	0	1	0	0	1	1	0	0	0
QZ565612	1.6	0	224	1	0	0	0	0	1	1	0	9	10	25	249	1.9	1	0	1	1	14	0	0	0	8.4	608	3.55	124	36.8	0	0	IIA	0	0	0	0	0	0	0	0	0
QZ566074	2.05	1	229	0	0	0	0	1	0	1	0	10	10	13	242	2.13	1	0	0	1	43	0	0	0	10.4	312	4.87	169	49.2	0	0	IIIA	1	1	0	0	1	0	0	1	0
QZ567195	2	0	230	1	0	0	0	0	2	1	0	9	9	18	248	2.15	0	0	0	17	8	0	0	0	14.3	441	3.66	129	38.2	0	0	IIA	0	0	0	0	0	0	0	0	0
QZ569760	3.27	1	284	0	0	0	0	0	0	1	0	8	10	1	285	3.18	0	0	0	2	32	0	0	0	13.7	245	5.55	192	57	0	0	IIA	1	1	0	0	1	0	1	0	0
QZ575945	1.15	1	203	1	0	0	0	0	2	1	2	5	8	52	255	2.5	1	0	1	1	47	0	0	0	4.8	350	3.08	95	28.5	0	0	IIA	0	1	0	0	0	0	1	0	0
QZ576255	1.82	1	218	1	0	0	0	1	0	1	0	10	10	21	239	2.13	1	0	0	1	14	0	0	0	13.6	451	4.37	147	43.1	0	0	IIA	0	0	0	0	0	0	0	0	0
QZ578602	2.05	1	234	0	0	0	0	1	0	1	0	10	10	7	241	2.03	0	0	0	1	14	0	0	0	9.8	238	3.76	146	41.3	0	0	IIA	0	0	0	0	0	0	0	0	0
QZ591102	3.05	1	256	1	0	0	0	0	0	0	0	10	10	10	266	3.15	1	0	0	10	3	0	0	0	11.7	342	4.42	155	43	0	0	IIA	0	0	0	0	0	0	0	0	0
QZ592168	2.85	1	279	0	0	0	0	0	0	0	0	7	8	4	283	2.9	1	0	0	3	19	0	0	0	6	286	4.17	147	41.7	0	0	IIA	0	0	0	0	0	0	0	0	0
QZ596618	2.1	0	259	1	0	0	0	0	0	1	0	10	10	10	269	2.2	1	0	0	10	3	0	0	0	10.4	409	4.64	165	46	0	0	IB	0	0	0	0	0	0	0	0	0
SH20223998	1.45	0	218	1	0	0	0	1	0	1	0	10	10	31	249	1.95	1	0	0	1	59	0	1	1	1.75	191	3.44	118	32.5	0	0	IB	0	1	0	0	0	0	1	1	0
SH20224452	1.54	1	222	0	0	0	0	1	0	0	1	10	10	24	246	2.04	0	0	0	2	16	0	0	0	9.54	275	3.45	114	32.1	0	0	IA	0	1	0	0	0	0	1	0	0
SH20225283	1.39	1	217	0	0	0	0	1	0	1	0	8	9	15	232	1.5	1	0	1	15	11	0	0	0	14.81	182	4.77	160	42.5	0	0	IA	0	0	0	0	0	0	0	0	0
SH20227586	1.345	1	209	1	0	0	0	0	0	0	3	7	3	26	235	1.85	0	1	1	2	25	0	0	0	10.56	382	3.03	101	27.9	0	0	IB	0	1	0	0	1	1	1	0	0
SH20230951	1.72	1	214	0	0	0	0	0	0	1	0	9	10	53	267	2.17	1	1	0	1	32	0	0	0	5.61	230	3.25	103	28.4	0	0	IIB	1	1	0	0	0	0	1	0	0
SH20232912	1.465	0	246	1	1	0	0	0	0	0	0	8	8	6	252	1.44	0	0	0	7	7	0	0	0	12.78	161	5.1	192	53.4	0	0	IB	0	0	0	0	0	0	0	0	0
SH20234568	0.81	1	197	1	1	0	0	0	0	0	1	8	10	95	292	2.13	1	1	1	1	67	0	1	3	26.39	331	4.67	135	39.4	1	0	IIA	1	1	0	0	0	0	1	0	0
SH20234653	2.36	0	241	1	0	0	0	0	0	0	1	8	10	4	245	2.27	0	0	0	5	10	0	0	0	11.21	269	5.16	185	48.4	0	0	IB	0	1	0	0	1	0	0	0	0
SH20235354	1.81	1	260	1	0	0	0	0	0	0	0	9	9	7	267	1.87	1	0	0	8	18	0	0	0	12.57	122	4.9	166	46.2	0	0	IIA	0	1	0	0	0	0	1	0	0
SH20239820	0.79	1	206	1	1	0	0	0	0	0	0	9	9	29	235	1.15	0	0	1	1	40	0	0	0	8.6	78	3.19	105	29.4	1	0	IB	0	1	0	0	0	0	1	0	0
SH20241211	1.29	1	201	0	0	0	0	0	0	0	1	5	9	31	232	1.75	1	0	1	1	26	0	1	1	8.41	344	4.41	143	40.4	1	0	IB	0	1	0	0	0	0	1	0	0
SH20241842	1.39	1	203	1	0	0	0	0	0	0	0	10	10	29	232	1.78	1	0	0	1	22	0	0	0	6.7	274	3.97	128	35	1	0	IA	0	1	0	0	0	0	1	0	0
SH20243408	1.75	0	218	0	0	0	0	0	0	1	0	9	10	11	229	1.8	1	0	0	1	21	0	0	0	15.35	421	5.23	182	48.4	0	0	IIA	0	0	0	0	0	0	0	0	0
SH20245272	1.29	0	225	1	0	0	0	1	0	1	1	7	9	19	244	1.45	1	1	0	1	23	0	0	0	4.29	320	3.65	134	35.5	0	0	IIA	0	1	0	0	1	1	1	0	0
SH20246873	1.855	0	245	1	1	0	0	0	0	0	0	9	9	6	251	1.71	0	0	0	8	17	0	0	0	7.37	213	2.98	96	27.8	1	0	IIB	0	1	0	0	0	0	1	0	0
SH20248142	1.335	1	213	1	0	0	0	0	0	1	1	6	9	20	233	1.52	0	0	1	1	57	0	0	0	8.34	731	2.52	94	26	0	0	IIB	0	1	0	0	0	0	1	0	0
SH20249094	0.77	1	189	1	0	0	0	1	1	1	2	6	8	11	200	0.75	0	0	1	1	19	1	0	0	20.88	14	3.04	122	31.7	0	0	IB	1	1	0	0	0	0	1	1	1
SH20254942	1.875	0	239	1	0	0	1	0	0	1	1	9	9	7	246	1.81	0	0	0	7	19	0	0	0	14.77	329	4.79	175	48.5	0	0	IB	0	0	0	0	0	0	0	0	0
SH20256895	1.78	1	228	1	0	0	0	0	2	1	1	8	9	7	235	1.87	0	1	0	1	23	0	0	0	10.42	28	2.94	103	28	0	0	IIB	0	1	0	0	0	0	1	1	0
SH20257419	0.85	1	181	0	0	0	0	0	0	0	2	4	7	64	245	1.79	1	1	1	1	72	0	1	2	9.32	927	3.59	106	30.3	0	0	IIB	0	1	0	0	0	0	1	0	0
SH20259400	2.795	0	251	1	1	0	0	0	0	0	1	9	10	6	257	2.6	0	1	0	6	15	0	0	0	6.27	198	4.4	153	43	0	0	IIB	0	1	0	0	0	0	1	0	0
SH20260674	2.31	1	255	1	0	0	0	0	0	0	0	9	9	6	261	2.35	1	1	0	6	17	0	0	0	13.62	450	3.18	107	29.9	0	0	IIA	0	1	0	0	0	0	1	0	0
SH20261560	1.875	1	244	1	0	0	0	1	0	0	1	9	10	4	248	1.78	0	0	1	4	22	0	0	0	3.24	16	4.38	161	44	0	0	IB	0	1	0	0	0	0	1	1	0
SH20262386	1.15	1	193	1	0	0	0	1	1	1	1	8	8	13	206	1.16	1	1	1	1	37	0	0	0	5.53	164	3.06	99	26.8	0	0	IIIA	1	1	0	0	0	0	1	0	0
SH20262394	2.56	0	258	1	0	0	0	0	0	0	0	9	10	8	266	2.48	1	0	0	9	15	0	0	0	11.74	315	4.23	152	41	0	0	IIA	0	0	0	0	0	0	0	0	0
SH20262986	2.37	0	260	1	0	0	0	0	0	0	0	9	10	6	266	2.22	1	0	0	6	16	0	0	0	13.92	505	3.83	139	37.7	0	0	IIA	0	0	0	0	0	0	0	0	0
SH20264932	1.07	0	198	1	0	0	0	0	2	0	1	8	8	31	229	1.43	1	1	1	3	37	0	1	1	8.28	375	2.17	78	21.3	0	0	IA	0	1	1	1	0	0	1	1	0
SH20265355	1.205	0	199	1	0	0	0	0	0	1	1	8	8	19	218	1.45	0	1	1	1	36	0	1	1	5.78	363	3.6	128	35.3	1	0	IA	0	1	0	0	0	0	1	1	0
SH20267876	1.375	0	212	0	0	0	0	0	0	0	1	8	10	24	236	1.8	0	1	1	1	24	0	0	0	3.59	185	2.79	100	26.8	1	0	IA	0	1	0	0	0	0	1	0	0
SH20269708	1.675	0	219	0	0	0	0	0	0	0	0	9	9	29	248	1.98	1	1	0	1	30	0	0	0	14.25	321	3.03	102	28.2	0	0	IB	0	1	0	0	0	0	1	0	0
SH20269715	1.18	0	195	0	0	0	0	0	0	0	3	7	9	10	205	1.06	0	1	1	1	55	0	1	2	11.39	220	3.26	113	30.1	0	0	IIA	0	1	0	0	0	0	1	0	0
SH20269839	1.32	1	206	1	0	0	0	0	0	1	1	9	9	28	234	1.61	0	0	0	1	35	0	0	0	15.68	425	3.1	109	29.1	0	0	IA	0	1	0	0	1	1	1	1	0
SH20270501	1.51	1	240	1	0	0	0	0	0	1	0	8	9	16	256	1.62	0	0	0	3	60	0	0	0	5.69	183	3.38	120	34.4	0	0	IA	0	1	0	0	0	0	1	0	0
SH20270538	1.22	0	212	1	1	0	0	0	0	1	1	7	8	32	244	1.63	0	0	0	1	30	0	0	0	12.01	327	3.19	110	30.2	0	0	IA	0	0	0	0	0	0	0	0	0
SH20270594	2.3	1	234	1	0	0	0	1	0	0	0	5	9	7	241	2.36	1	0	0	1	22	0	0	0	22.35	383	3.78	138	36.9	0	0	IB	0	0	0	0	0	0	0	0	0
SH20270625	1.48	0	205	1	0	0	0	0	1	0	2	1	6	28	233	1.82	0	0	1	1	39	0	1	2	7.27	354	3.92	125	34.3	1	0	IIA	1	1	0	0	0	0	1	1	0
SH20271221	1.32	1	225	1	0	0	0	1	0	0	2	8	9	10	235	1.6	0	0	1	1	18	0	0	0	19.95	230	4.44	164	44.8	0	0	IA	0	0	0	0	0	0	0	0	0
SH20272700	2.21	0	236	1	0	0	0	0	0	1	0	8	9	6	242	2.14	0	0	1	7	17	0	0	0	6.2	259	3.2	116	34.4	0	0	IA	0	1	0	0	0	1	1	0	0
SH20274358	1.71	1	222	0	0	0	0	0	0	0	1	7	8	26	248	2.01	1	1	0	1	53	0	0	0	11.03	524	3.72	127	33.5	0	0	IIA	0	1	0	0	1	1	0	0	0
SH20274670	0.925	1	199	1	1	0	0	0	0	0	2	5	8	41	240	1.5	1	0	0	1	23	0	1	2	12.46	700	2.59	89	24.6	0	0	IIA	0	1	0	0	0	0	1	0	0
SH20275193	1.98	0	255	1	1	0	0	0	0	0	0	9	10	5	260	1.95	1	0	0	4	33	1	0	0	14.81	278	4.14	146	40.2	0	0	IIB	1	1	0	0	0	0	1	0	0
SH20275806	1.89	1	227	1	0	0	0	1	1	0	0	9	10	22	249	2.05	0	0	0	1	31	0	0	0	13.91	341	4.25	152	42.8	0	0	IIB	0	0	0	0	0	0	0	0	0
SH20278135	1.66	1	212	1	0	0	0	0	0	0	1	7	8	14	226	1.73	0	1	0	1	28	0	0	0	19.2	395	4.1	153	41.9	0	0	IA	0	1	0	0	1	0	1	0	0
SH20279944	0.985	0	192	0	0	0	0	0	0	0	2	6	8	54	246	1.86	0	1	1	1	101	0	1	2	2.91	215	5.43	155	42.9	1	0	IIB	1	1	0	0	0	0	1	1	0
SH20282210	1.12	1	213	1	1	0	0	0	0	0	1	8	9	23	236	1.43	0	0	0	1	48	0	0	0	8.88	187	2.71	105	27.9	0	0	IA	0	1	0	0	0	0	1	0	0
SH20283004	1.41	1	226	1	1	0	0	0	0	0	1	9	9	32	258	1.9	0	0	0	2	29	0	0	0	9.13	360	3.24	111	30.8	0	0	IB	0	1	0	0	0	0	1	0	0
SH20283426	1.13	0	195	0	0	0	0	1	0	1	2	6	8	35	230	1.62	1	0	1	1	26	0	1	2	7.69	339	4.8	141	41.6	0	0	IA	0	1	0	0	0	0	1	0	0
SH20283429	1.69	1	225	1	0	0	0	1	0	1	1	8	9	19	244	1.91	0	0	0	1	27	0	0	0	7.04	134	5.28	182	50.5	0	0	IB	0	1	0	0	0	0	1	0	0
SH20283840	1.21	1	206	1	0	0	0	0	0	0	2	8	8	24	230	1.4	0	1	1	1	37	0	1	2	6.23	318	3.84	129	35.2	0	0	IIB	0	1	0	0	0	1	1	0	0
SH20289350	2.255	1	239	1	0	0	0	0	0	0	1	8	9	10	249	2.2	0	1	0	10	17	0	0	0	14.55	215	4.14	141	39	0	0	IA	0	1	0	0	0	0	1	0	0
SH20289831	1.56	1	214	1	1	0	0	0	0	1	1	8	9	32	246	2.27	1	0	0	4	50	0	0	0	7.39	419	3.62	118	36.4	0	0	IB	0	1	0	0	0	0	1	0	0
SH20290027	1.8	0	235	1	0	0	0	0	0	0	1	6	9	7	242	1.8	0	1	1	6	21	0	0	0	4.22	226	5.07	194	56.5	0	0	IIIB	1	0	0	0	0	0	0	0	0
SH20290310	1.795	1	215	1	0	0	0	1	0	0	2	9	9	20	235	1.85	1	0	0	1	20	0	0	0	11.4	562	3.66	122	35.7	0	0	IIB	0	0	0	0	0	0	0	0	0
SH20290755	1.67	1	230	1	1	0	0	0	0	0	0	9	10	7	237	1.63	0	1	0	9	14	0	0	0	9.49	200	4.57	174	52	0	0	IIB	0	0	0	0	0	0	0	0	0
SH20291354	1.49	0	223	0	1	0	0	0	0	0	2	9	9	26	249	1.75	1	1	0	1	18	0	0	0	15.32	408	4.56	158	47.4	0	0	IIA	0	0	0	0	0	0	0	0	0
SH20291421	0.865	0	220	1	1	0	0	0	0	0	2	9	9	31	251	1.22	0	1	0	1	37	0	0	0	2.31	321	2.71	80	24.9	0	0	IIB	1	1	0	0	0	0	1	0	0
SH20292467	1.25	1	207	0	0	0	0	0	0	0	2	8	8	23	230	1.68	1	1	1	1	44	0	0	0	8.85	444	3.23	108	29.2	0	0	IIIA	1	1	0	0	0	0	1	0	0
SH20294146	2.25	1	241	0	0	0	0	1	0	0	0	9	9	8	249	2.3	1	0	0	1	31	0	0	0	11.31	340	3.99	138	37	0	0	IIIB	1	1	0	0	0	0	1	0	0
SH20296245	1.8	1	231	0	0	0	0	0	0	0	0	8	9	11	242	1.73	0	1	0	12	15	0	0	0	14.58	422	4.82	167	48.7	0	0	IIB	0	1	0	0	1	1	1	0	0
SH20297009	1.09	0	195	0	0	0	0	0	0	1	2	6	8	68	263	2.43	1	1	0	1	77	0	1	2	12.47	381	4.33	126	38.6	1	0	IIA	0	1	0	0	0	0	1	1	0
SH20297084	2.48	1	252	1	0	0	0	1	0	0	0	9	9	24	276	2.66	0	0	0	8	26	0	0	0	7.66	319	2.49	91	28.8	0	0	IIA	0	0	0	0	0	0	0	0	0
SH20297459	2.38	0	244	1	1	0	0	0	0	0	0	10	10	8	252	2.34	0	0	0	5	12	0	0	0	13.1	262	4.81	175	53.1	0	0	IIB	0	0	0	0	0	0	0	0	0
SH20298647	1.525	1	212	1	0	0	0	0	1	0	2	8	8	12	224	1.56	0	1	1	1	12	1	0	0	15.16	533	3.9	156	43.4	0	1	IIIB	1	1	0	0	0	0	1	1	1
SH20299669	1.63	0	223	1	0	0	0	0	0	1	2	7	8	33	256	2.16	0	1	0	1	25	0	0	0	13.32	301	3.53	125	36.7	1	0	IIA	0	0	0	0	0	0	0	0	0
SH20301311	1.01	0	209	1	1	0	0	0	0	1	1	7	9	44	253	1.8	1	0	1	1	35	0	0	0	2.14	257	3.4	112	34.7	0	0	IA	0	1	0	0	0	0	1	1	0
SH20303239	1.735	0	218	1	1	0	0	0	1	0	3	3	5	30	248	1.99	0	0	1	30	21	0	1	1	6.15	353	3.47	116	35.6	0	0	IB	0	1	0	0	0	0	1	0	0
SH20304041	1.27	1	208	1	0	0	0	0	0	0	2	7	8	29	237	1.51	0	0	1	6	42	0	0	0	4.17	278	2.77	91	27.4	0	0	IIIA	1	1	0	0	0	0	1	0	0
SH20304116	1.52	1	209	1	0	0	0	0	2	1	0	8	8	41	250	2.29	1	1	0	2	34	0	1	2	17.9	399	4.99	137	41.7	0	0	IB	0	1	0	0	0	0	1	0	0
SH20304325	1.16	0	211	1	1	0	0	1	0	1	1	9	9	13	224	1.23	1	1	1	1	21	0	0	0	15.64	341	4.62	171	49.2	0	0	IB	0	1	0	0	1	1	1	0	0
SH20305973	3.22	0	266	1	1	0	0	0	0	0	0	9	10	8	274	2.89	1	0	0	8	14	0	0	0	31.56	399	4.29	156	44.5	0	0	IIA	0	1	0	0	0	0	1	0	0
SH20307506	1.7	0	238	1	0	0	0	0	0	0	0	10	10	12	250	1.86	0	0	0	13	11	0	0	0	12.39	334	3.32	125	37.4	0	0	IB	0	1	0	0	0	0	1	0	0
SH20311371	1.02	1	212	1	1	0	0	0	0	0	2	2	5	41	253	1.72	1	1	1	2	19	0	0	0	7.23	310	3.29	122	36.9	0	0	IB	0	1	0	0	0	0	1	0	0
SH20315303	3.3	0	270	0	0	0	0	0	0	0	0	10	10	9	279	3.2	1	1	0	10	14	0	0	0	19.79	565	3.66	136	45.2	0	0	IIB	0	0	0	0	0	0	0	0	0
SH20318424	1.53	1	237	1	1	0	0	0	0	0	0	10	10	4	241	1.39	0	1	1	2	11	0	0	0	7.44	165	4.37	173	50.8	0	0	IB	0	1	0	0	1	1	1	0	0
SH20319518	2.33	1	228	0	0	0	0	0	0	1	0	9	9	16	244	2.09	1	1	0	2	13	0	0	0	11.4	562	4.36	151	43.6	0	0	IB	0	0	0	0	0	0	0	0	0
SH20322069	1.458	1	212	1	1	0	0	0	1	1	1	8	9	12	224	1.41	1	1	1	12	22	0	0	0	30.75	578	4.79	155	46.3	0	0	IIB	1	1	0	0	0	0	1	0	0
SH20331723	2.355	0	255	1	0	0	0	0	0	0	1	1	9	5	260	2.23	1	1	0	5	16	0	0	0	15.88	257	3.88	138	39.5	0	0	IIIA	1	1	0	0	0	0	1	0	0
SH20339561	2.65	1	261	1	0	0	0	0	0	0	0	9	10	6	267	2.65	1	1	0	6	18	0	0	0	7.46	233	3.01	107	32.6	0	0	IIA	0	0	0	0	0	0	0	0	0
SH20339850	3.4	1	260	1	0	0	0	0	0	0	0	10	10	3	263	3.31	0	0	1	2	17	0	0	0	17.97	222	6.26	220	62.6	0	0	IB	0	0	0	0	0	0	0	0	0
SH20345194	1.9	0	241	0	0	0	0	1	0	1	0	9	9	15	256	1.92	1	1	0	15	16	0	0	0	13.41	498	3.7	145	42.9	0	0	IB	0	0	0	0	0	0	0	0	0
SH20346729	1.745	0	231	1	0	0	0	0	1	0	2	8	8	3	234	1.7	0	1	1	3	11	0	0	0	4.26	108	3.91	146	44.4	0	0	IIB	1	0	0	0	0	0	0	0	0
SH20348676	2.05	1	238	1	0	0	0	1	0	0	0	9	10	11	249	2.25	1	0	1	13	15	0	0	0	5.46	414	3.08	112	30.8	0	0	IIB	1	1	0	0	0	0	1	1	0
SH20349331	0.68	1	197	1	1	0	0	0	0	1	2	6	8	41	238	1.24	0	1	1	1	57	0	1	2	16.83	349	4.27	132	39.1	0	0	IIA	0	1	0	0	0	0	1	0	0
SH20350003	2.845	0	248	0	0	0	0	1	0	0	0	9	10	4	252	2.45	1	0	0	8	24	0	0	0	52.16	309	3.77	139	39.2	0	0	IIA	0	1	0	0	0	0	1	0	0
SH20359708	2.35	0	259	1	1	0	0	0	0	1	0	8	9	3	262	2.22	1	0	0	4	5	0	0	0	5.77	171	5.07	194	57.3	0	0	IB	0	0	0	0	0	0	0	0	0
SH20360786	1.86	1	246	1	1	0	0	0	0	1	0	10	10	9	255	1.83	1	0	1	9	23	0	0	0	18.78	172	5.59	209	60.4	0	0	IIB	0	1	0	0	0	0	1	0	0

## Sheet: new_key_opt
Sample_ID	Institude	ID	Name	Weight (kg)	Gender	Gestational Age (days)	Delivery Method	Gestational Hypertension	Chorioamnionitis	Intrahepatic Cholestasis of Pregnancy	Premature Rupture of Membranes	Placental Condition	Antenatal Steroid Use
string	string	string	string	numeric	0=female/1=male	numeric	0=Vaginal Delivery/1=C-Section	0=No/1=Yes	0=No/1=Yes	0=No/1=Yes	0=No/1=Yes	0=None;1=Placental Abruption;2=Placenta Previa	0=No/1=Yes
Resuscitation Needed	1-min Apgar Score	5-min Apgar Score	Age of Illness Onset (days)	Corrected Gestational Age (days)	Weight at NEC Onset (kg)	Full Enteral Feeding at Onset	hsPDA After Birth	Respiratory Support During Illness	Age at antibiotic use (days)	Duration of antibiotic use (days)
0=No Resuscitation;1=Non-Invasive Ventilation;2=Invasive Ventilation;3=Invasive Ventilation+Chest Compressions	numeric	numeric	numeric	numeric	numeric	0=No/1=Yes	0=No/1=Yes	0=No/1=Yes	numeric	numeric
Gastrointestinal Perforation	WBC Count at NEC Onset (*10^9/L)	Platelet Count at NEC Onset (*10^9/L)	RBC Count at NEC Onset (*10^12/L)	Hemoglobin Level at NEC Onset (g/L)	Hematocrit at NEC Onset (%)	Blood Transfusions in 1 Week Before NEC	Acute Kidney Injury During NEC
0=No/1=Yes	numeric	numeric	numeric	numeric	numeric	0=No/1=Yes	0=No/1=Yes
Periventricular Leukomalacia Before NEC	Periventricular Leukomalacia After NEC	Intraventricular Hemorrhage Grade Before NEC	Intraventricular Hemorrhage Grade After NEC
severity description	severity description	0=No/1=Yes	0=No/1=Yes
Treatment	BPD	BPD Severity	Sepsis	Shock	NEC Stage	Outcome	Length of Stay (days)	sevNEC	sevOutcome
0=Conservative Treatment/1=Surgery	0=No/1=Yes	0/1/2/3	0=No/1=Yes	0=No/1=Yes	Bell's Staging	0=Cured and Discharged/1=Death	numeric	0=No/1=Yes	0=No/1=Yes
